# Supplementary material
Source: PubMed Central journal article supplement (PMC9070842)
Supplement: NIHMS1786734-supplement-Appendix.pdf [file NIHMS1786734-supplement-Appendix.pdf]

## For Online Publication

### Appendix to “A Satellite Account for Health in the United States”<sup>1</sup>

David M. Cutler, Kaushik Ghosh, Kassandra L. Messer, Trivellore Raghunathan,  
Allison B. Rosen and Susan T. Stewart

#### Appendix A: MCBS Data

In this appendix, we present various technical aspects of the data assembly and analysis. The primary data we employ are from the Medicare Current Beneficiary Survey (MCBS; CMS, 1999-2012a). Since the non-elderly population in Medicare consists only of the disabled, we work with data from the elderly population only. There are two MCBS samples: the Access to Care sample, which includes everyone who responds to the annual (fall) survey, and the Cost and Use sample, which consists of all enrollees, whether or not they survived. We use the Cost and Use sample so that we can track all enrollees. The sample size is about 13,000 people annually.

##### A.1 HMO Enrollment Adjustment

MCBS has incomplete or no claims information for beneficiaries enrolled in Health Maintenance Organizations (HMOs). To adjust for this, we develop a weighting adjustment similar to the non-response adjustments performed for unit non-response in national surveys (Little, 1986; Kreuter et al., 2010). We begin by defining two groups: those with complete Medicare enrollment and those enrolled in HMOs. We define complete Medicare enrollment as (1) no participation in Medicare Advantage (HMO) program for the year of study, and (2) enrollment in traditional fee-for-service Medicare parts A & B for the full 12-month study period, unless the participant died during the year. We use a propensity score method to create the adjustment weights. We perform these adjustments separately for the community and institutionalized populations. Since the majority of our sample (~92%) consists of community residents, we present the results for the community population here. A logistic regression model is estimated using selected covariates (demographics, health status, and socioeconomic variables) to model traditional Medicare enrollment. **Table A1** gives the list of covariates used for such adjustments. Using the predicted

---

<sup>1</sup> Additional description and some results and statistical programs are being compiled at: <https://nber.org/programs-projects/projects-and-centers/satellite-national-health-accounts>. Replication code and data that can be made public are available at <http://doi.org/10.3886/E143521V1>

probability ( $p$ ) of complete Medicare enrollment, the adjustment for HMO enrollees is calculated as  $1/p$ . Model fit was assessed by a Hosmer-Lemeshow (Hosmer & Lemeshow, 1980) test.

**Table A2** reports the Hosmer-Lemeshow goodness of fit statistics. In our estimation, there are ten groups, and hence we have eight degrees of freedom. The corresponding Chi-squared values are also reported. The model passes the test suggesting a good fit.

To assess balance in the community population, the propensity of complete Medicare enrollment is estimated using Generalized Linear Models (GLM); F-ratios were reviewed for significance. In the institutionalized population, regression analyses are performed for each covariate to assess its association with the propensity for complete Medicare participation. Using the residuals from each model, we calculate effect size to evaluate balance. We then calculate the “final weight” as the product of the existing MCBS survey weight and the Medicare HMO adjustment weight.

**Figure A1** shows the distribution of propensity scores for complete Medicare enrollment for the 2009 Medicare community population. The overlap between the complete Medicare and HMO populations is high. **Table A3** shows the comparison between the complete Medicare and HMO-adjusted elderly populations. The distributions of age, sex, race, education, marital status, and health status are mostly similar between the complete Medicare enrollment and HMO-adjusted populations.

## **A.2 Survey Spending Adjustment**

A second adjustment is made so that total medical spending in the MCBS matches what was reported to be national spending on the elderly in the National Health Expenditure Accounts (CMS, 1999-2012b). **Table A4** provides details; see also Rosen et al. (2017), and NHEA (2014). We remove nearly 10% of expenditures from the National Health Expenditure Accounts (NHEA) for goods and services which are out of the scope of the MCBS survey. In addition, 4% of spending is moved across some categories of services in the NHEA and MCBS, to create consistent categories between the two sources. Finally, spending in the MCBS is proportionately increased by the factors necessary to have total survey spending equal to the remaining portion of the NHEA total in each service-by-payer category. **Figure A2** shows the adjustments. Overall, the NHEA-adjusted spending is 11% higher than the total spending reported in MCBS. The adjustment is largest for home health (43%) and relatively small for the other types of services.

### A.3 Estimation of Quality of Life Decrements

To measure quality of life decrements by condition, we use data on a number of measures of health status asked about in MCBS, shown in **Table A5**. These include functional limitations, limitations in Activities of Daily Living, and limitations in Instrumental Activities of Daily Living. In addition, people are asked whether they have difficulty seeing or hearing. Finally, people are asked whether health limits their social interactions. Trends in each of these impairments and symptoms are shown in **Figure A3**.

To aggregate these indicators into a single measure of quality of life, we use data from the 2002 MEPS (AHRQ, 2002). In that year, the Medical Expenditure Panel Survey asked people similar questions about their health and also included an overall health assessment on a scale of 0 ('worse imaginable health state') to 100 ('best imaginable health state'): "To help people say how good or bad a health state is, we have drawn a scale (rather like a thermometer) on which the best state you can imagine is marked by 100 and the worst state you can imagine is marked by 0. We would like you to indicate on this scale how good or bad your own health is today, in your opinion. Please do this by drawing a line from the circle below to whichever point on the scale indicates how good or bad your current health state is." We regress the response to this scale question (transformed to 0-1) on the health metrics.

**Table A5** shows the regression results. The constant term is 0.85 and is statistically different from 1. All of the coefficients on the impairments are negative and statistically significant, with the largest decrement being for health interfering with social interactions (-0.16 for moderate interference and -0.20 for severe interference). These coefficients are used to calculate quality of life scores for each individual in MCBS, based on their self-reported symptoms and impairments.

We hold constant the decrements for symptoms and impairments over time, allowing the changes in prevalence of these problems to drive changes in health. We do this in part because the 100-point rating of health was only available in the early 2000's in MEPS, and in part because we would not expect their impact on QOL to change very much over time; the impact of difficulty walking on QOL for example would likely only change gradually over time, as influenced by societal changes. This assumption is supported by our earlier work comparing weights across two independent years of MEPS data (Stewart et al., 2008).

Three areas for which we did not have direct self-report measures in MCBS were pain, cognition, and mental health symptoms. For people with conditions that can affect these symptoms and impairments—i.e., mental health, musculoskeletal, dementia—we captured QOL effects only to the extent that the conditions affected our measures of function. To get a sense of the potential effect of these omissions, we use data from the Health and Retirement Study (HRS), a biennial survey of people aged 51 and older conducted since 1992 (HRS, 2021; RAND, 2021).

The pain measure was derived from the HRS questions: ‘Are you often troubled with pain?’ and if yes, ‘How bad is the pain most of the time: mild, moderate or severe?’ The cognitive measure was a summary score with a maximum of 35 points based on measures of word recall, counting backward by 7’s and by 1’s, naming objects based on description (scissors, cactus), and naming the date (month, day, year, day of week) and country leaders (president, vice-president). Depression symptoms were the 8 questions that form the CES- D 8 (Center of Epidemiological Studies Depression Scale): ‘Much of the time during the past week, I felt depressed, I felt everything I did was an effort, my sleep was restless, I was happy (reverse-scored), I felt lonely, I enjoyed life (reverse-scored), I felt sad, I could not “get going”.’

**Figure A4** shows trends in these measures. From 1998 through 2012, the share of respondents reporting persistent pain rose in this survey. Cognition, as measured by a range of tests, remained stable. Depressive symptoms declined slightly.

**Figure A5** shows the relationship between these symptoms and impairments and those we include. The first panel sorts people by pain. The left figure shows the percent of people with each level of pain who have ADL or IADL impairments, and the right figure shows the average, 25<sup>th</sup> percentile, and 75<sup>th</sup> percentile of number of functional impairments. ADL impairments, IADL impairments, and functional limitations are all rising with higher levels of pain. People experiencing moderate or severe levels of pain are 3.2 times more likely to report an ADL impairment and 1.8 times more likely to report an IADL impairment than people experiencing no pain. Even the 25<sup>th</sup> percentile of people with severe pain have the same number of functional limitations as the 75<sup>th</sup> percentile of people experiencing no pain. The next panels show similar results for cognitive impairment and depression. In each case, the symptoms and impairments we exclude are highly correlated with variables that are not asked about, with the exception that functional limitations do not vary with cognitive impairment. This suggests that our measure of

quality of life is not likely to be very far off even though we do not directly measure quality in every dimension.

#### **A.4 Condition Definitions and Prevalence**

We developed a classification schema for medical conditions building upon the Agency for Healthcare Research and Quality’s (AHRQ) Clinical Classification Software (CCS), which aggregates the 14,000+ ICD-9-CM diagnosis codes and 3,900+ ICD-9-CM procedure codes into 285 clinically meaningful, mutually exclusive categories (Elixhauser, Steiner, and Palmer, 2014).

Our physician working group<sup>2</sup> determined that some of the conditions should be combined due to low prevalence in the elderly, and others should be disaggregated. The latter category was typically mental health conditions; for example, the CCS “mood disorders” category was separated into depression and bipolar disorder. We started with 105 conditions.

Prevalence rates for some conditions in the MCBS were below those based on self-reports and physical assessment in national surveys. This was generally true for chronic diseases that are not serious enough to warrant a medical visit on their own, or at least not every year: hypertension and high cholesterol, for example. By definition, undiagnosed conditions are also not in MCBS. For such conditions, we used self-reports and diagnosed condition rates in NHANES (CDC, 1999-2012a) to estimate ‘calibrated’ health conditions in MCBS that more accurately reflect national prevalence rates.

The imputation method proceeded in several steps, described in Raghunathan et al., 2020. We chose to impute the community and institutionalized populations separately, given the differences in these populations. We began by appending data from each year of MCBS to the relevant wave of NHANES, for example appending the 2009–2010 NHANES to the 2009 MCBS. Each person was placed into one of three groups: having the condition in the self-report (NHANES) or claims (MCBS), not having the condition if the NHANES self-report indicated the beneficiary did not have the health condition and there was no claim for the condition, and missing if there was no claim for the health condition in the MCBS. We then had a standard missing data problem for which we used a sequential regression multivariate imputation procedure.

For conditions present in NHANES, let  $D_{(-j)}$  denote the collection of disease indicators for

---

<sup>2</sup> Special thanks to Ken Langa (M.D., Ph.D., University of Michigan), Paul Pirraglia (M.D., M.P.H., University of Massachusetts Medical School-Baystate), and Sandeep Vijan (M.D., M.S., University of Michigan).

all diseases except disease  $j$ . We constructed a propensity score for having disease  $j$  based on fitting a logistic regression model to the other conditions and exogenous covariates,  $X$ , and predicting with  $(X, D_{(-j)})$  strata based on the propensity scores. Within each propensity score class, we estimated the prevalence rate using the self-report,  $S_j$ , and the claims  $C_j$ . If the prevalence rate based on the claims was greater than or equal to that based on the self-report, then we set all missing  $D_j$  to 0. That is, no additional imputation was necessary, and all those with no claims were considered not to have that health condition. If the self-report prevalence rate was greater than the prevalence rate based on the claims, we randomly set some missing  $D_j$  to 1 so that the prevalence rates after the imputation matched the self-report prevalence rates. We used five Bernoulli draws within each propensity score class to achieve this calibration, resulting in five imputed data sets.

Note that medical expenditure and health conditions without self-report are missing in the NHANES portion of the appended data. To be fully conditional, these missing values were first imputed in the NHANES. Little and Raghunathan (1997) show that estimates of the parameters of interest will be biased without conditioning on the spending outcome; Raghunathan and Paulin (1998) show the bias empirically. These two steps – the medical spending/health condition imputations into NHANES and the disease imputations into MCBS – were iterated across all diseases several times until the multiply imputed prevalence rates stabilized.

The regression relationship between the multiply imputed  $D_j$ , and claims-based  $C_j$  for conditions available in NHANES may be viewed as a measurement error model, and this relationship is then used to calibrate other health conditions not present in NHANES. In this step, we chose the most similar prevalent condition for the imputation.

The NHANES is a sample of the community-dwelling population only. Thus, the claims imputation for the institutionalized sample required some differences. For this population, the calibrated non-institutionalized MCBS data was considered as the ‘donor’ survey. For each claim, subjects were matched according to the estimated propensity of being institutionalized given the self-report and demographic information, and the remaining claims. To estimate this propensity, logistic regression was utilized with a forward selection procedure on the principal components of the set of variables of interest. This principal component analysis was used in an effort to explain as much of the variation in propensity scores as possible while avoiding a complete separation of data points given the small number of people who are institutionalized. Assuming that the probability of being calibrated was the same conditional on institutionalization status, calibrated

conditions were drawn for the institutionalized population matching the distribution for the community population.

The calibration process produced five imputed data sets for both community and institutionalized populations. We used all five imputed data sets in our analysis using appropriate survey weight and sample design adjustments.

Because some of our 105 calibrated conditions have relatively low prevalence in the elderly, even after calibration, before estimating spending by condition we collapsed our initial set of 105 conditions to 80 conditions with generally higher prevalence. As noted in the text, we present the results in 30 aggregates. **Table A6** shows the 30 categories used in the analysis, along with the conditions that go into them.

Some of the conditions we examine are risk factors for other medical conditions. We developed the list of risk factors in consultation with the clinical experts noted above. The most common risk factors are for cardiovascular disease and renal disease; these are widely noted in textbooks and research papers. Other risk factors are directly related to direct conditions, for example cancer screening and cancer, and immunization and infectious disease. Risk factors for dementia, accidents, and frailty were assessed by the clinical experts.

**Figure A1: Propensity Score for Complete Medicare Enrollment,  
2009 MCBS Community Sample**

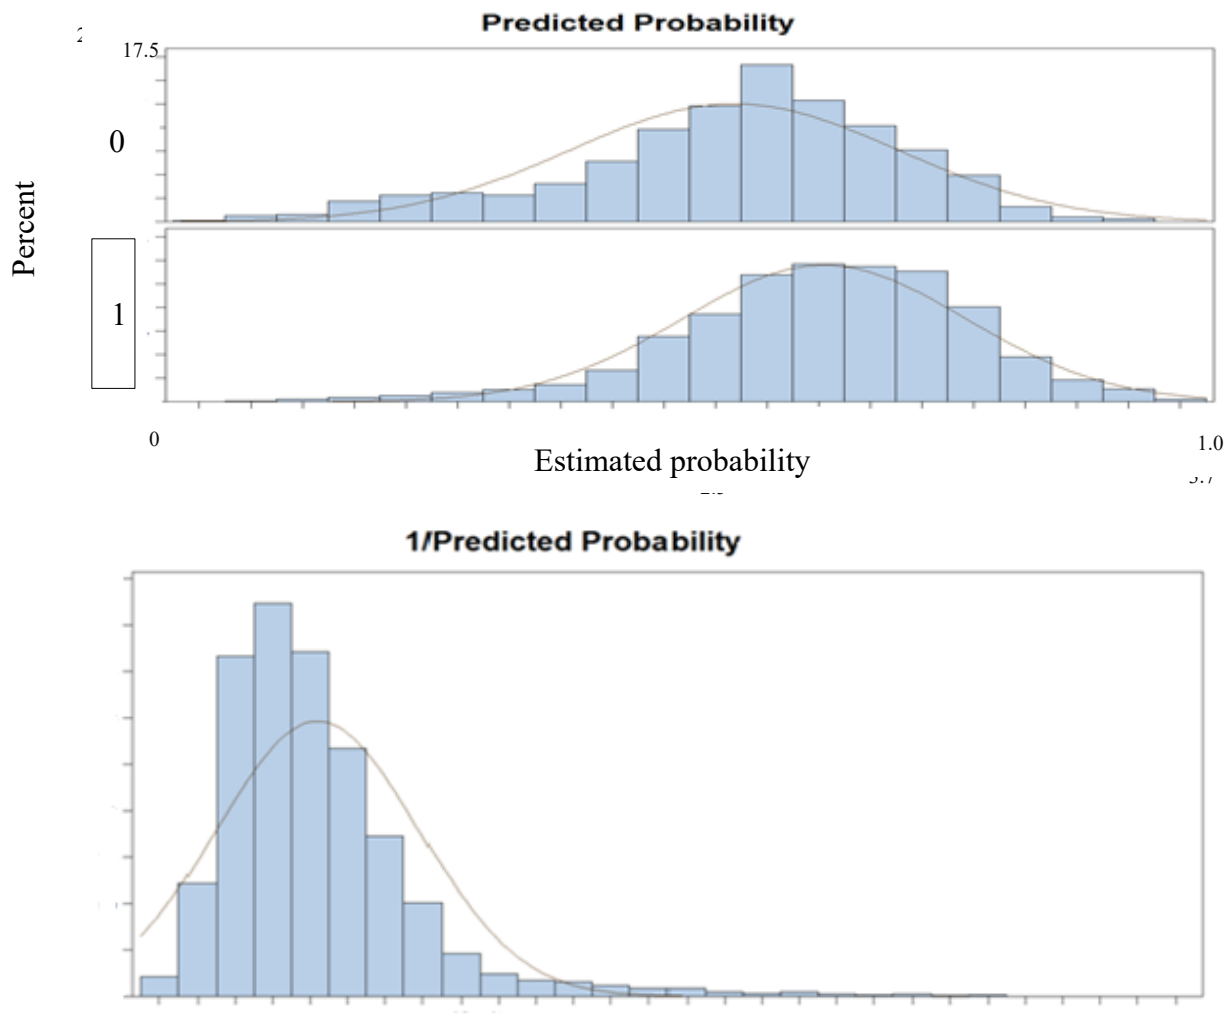

Note: Predictors in the propensity score model include demographics, health status (including ADLs and IADLs), and socioeconomic variables, listed in Table A1. Here, 1 is complete Medicare enrollment (full-year enrolment in traditional fee-for-service Parts A and B), and 0 includes at least some HMO enrollment. Figure 1b shows that adjustment factors are in a tight range.

**Figure A2: Ratios to Adjust Spending in MCBS to match NHEA, by Service Categories**

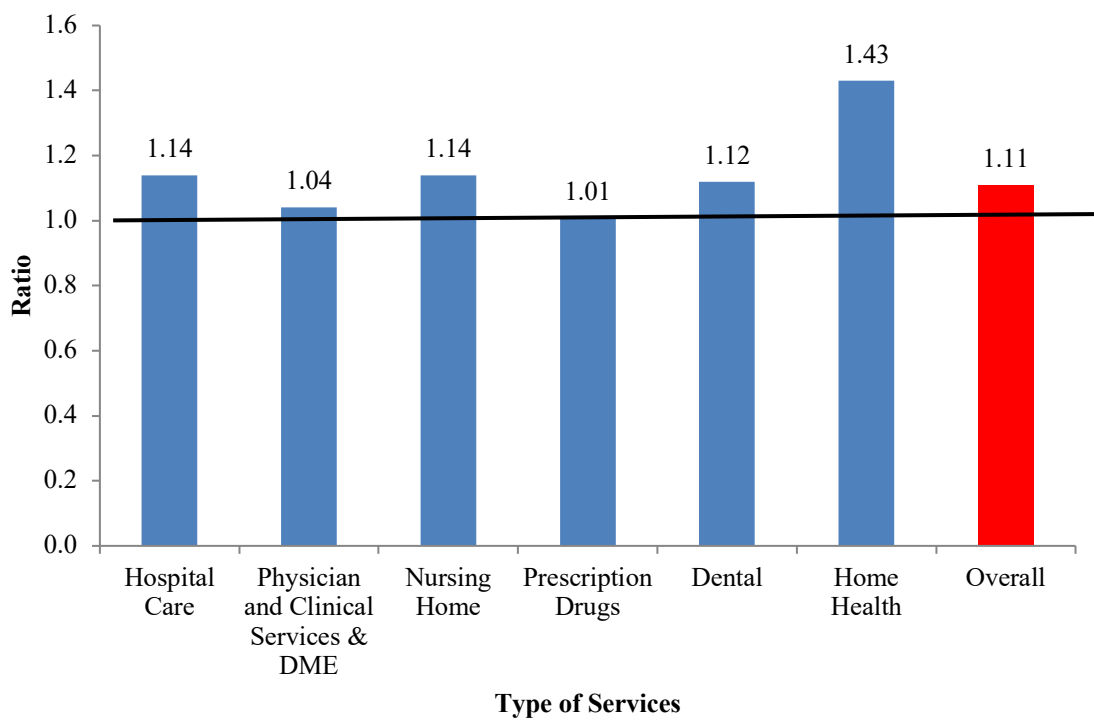

Note: NHEA= National Health Expenditure Accounts. Ratios are shown for the year 2009 as an example, but were similar across years.

**Figure A3: Prevalence of Each Impairment and Symptom in MCBS  
Used for Quality of Life**

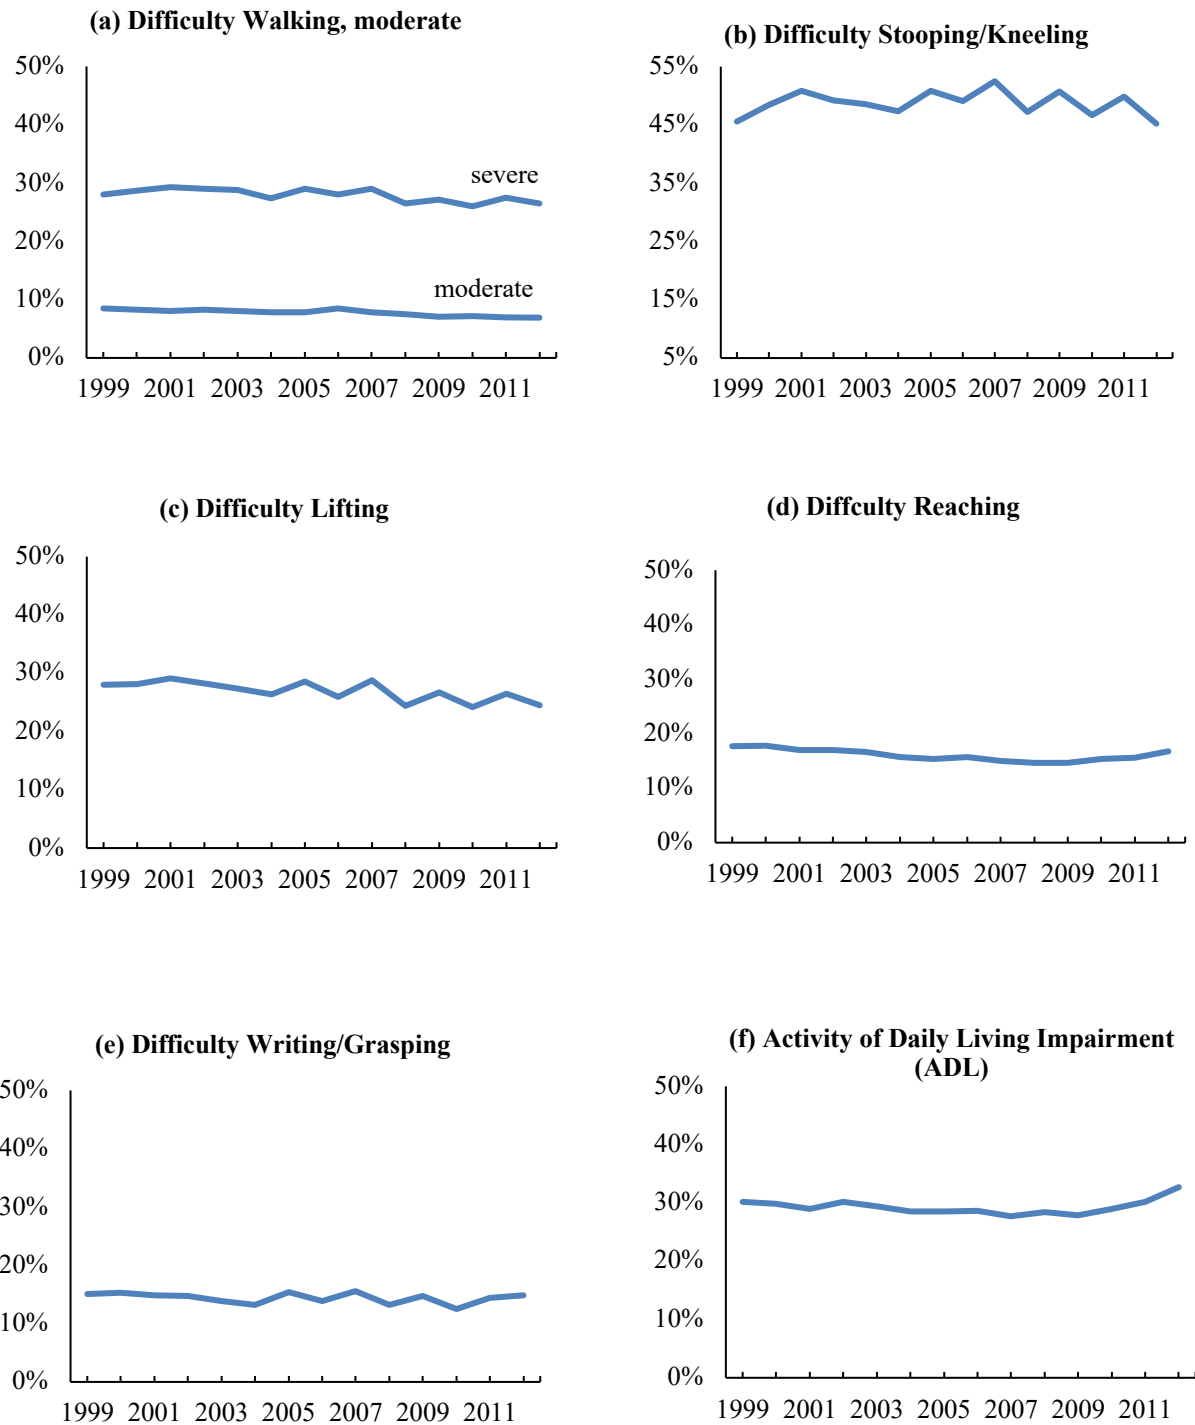

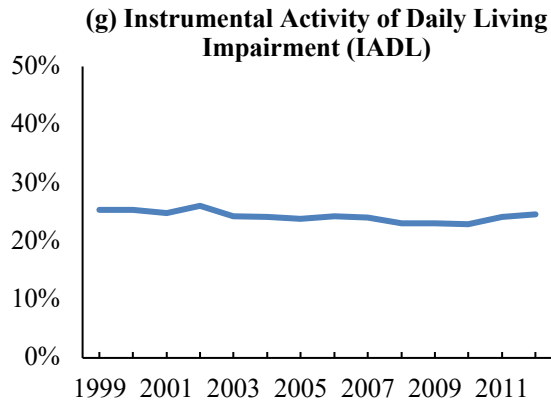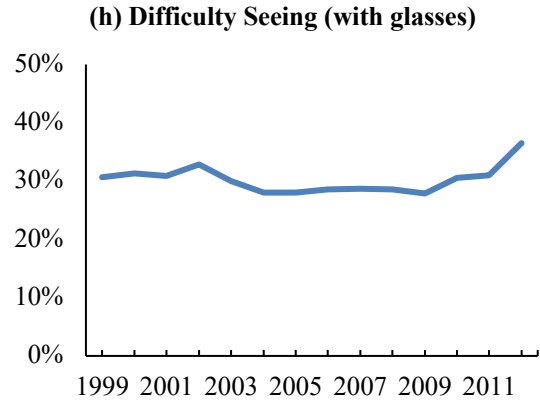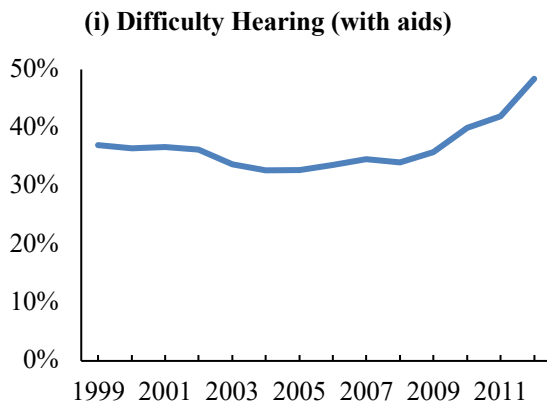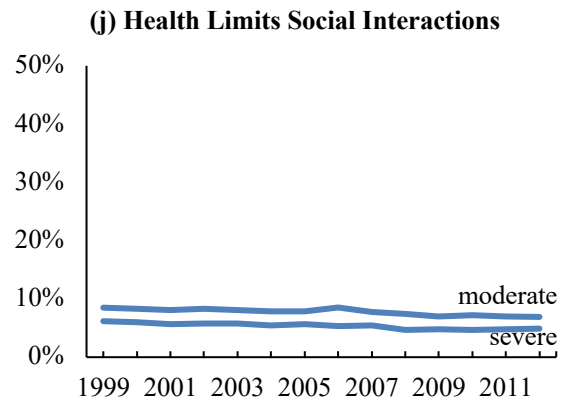

Note: Data are from the Medicare Current Beneficiary Survey and are age-adjusted to the year 2010 using 10 year age groups.

**Figure A4: Trends in Pain, Cognition, and Mental Health Symptoms among Those Age 65+ in the Health and Retirement Study, 1998-2012**

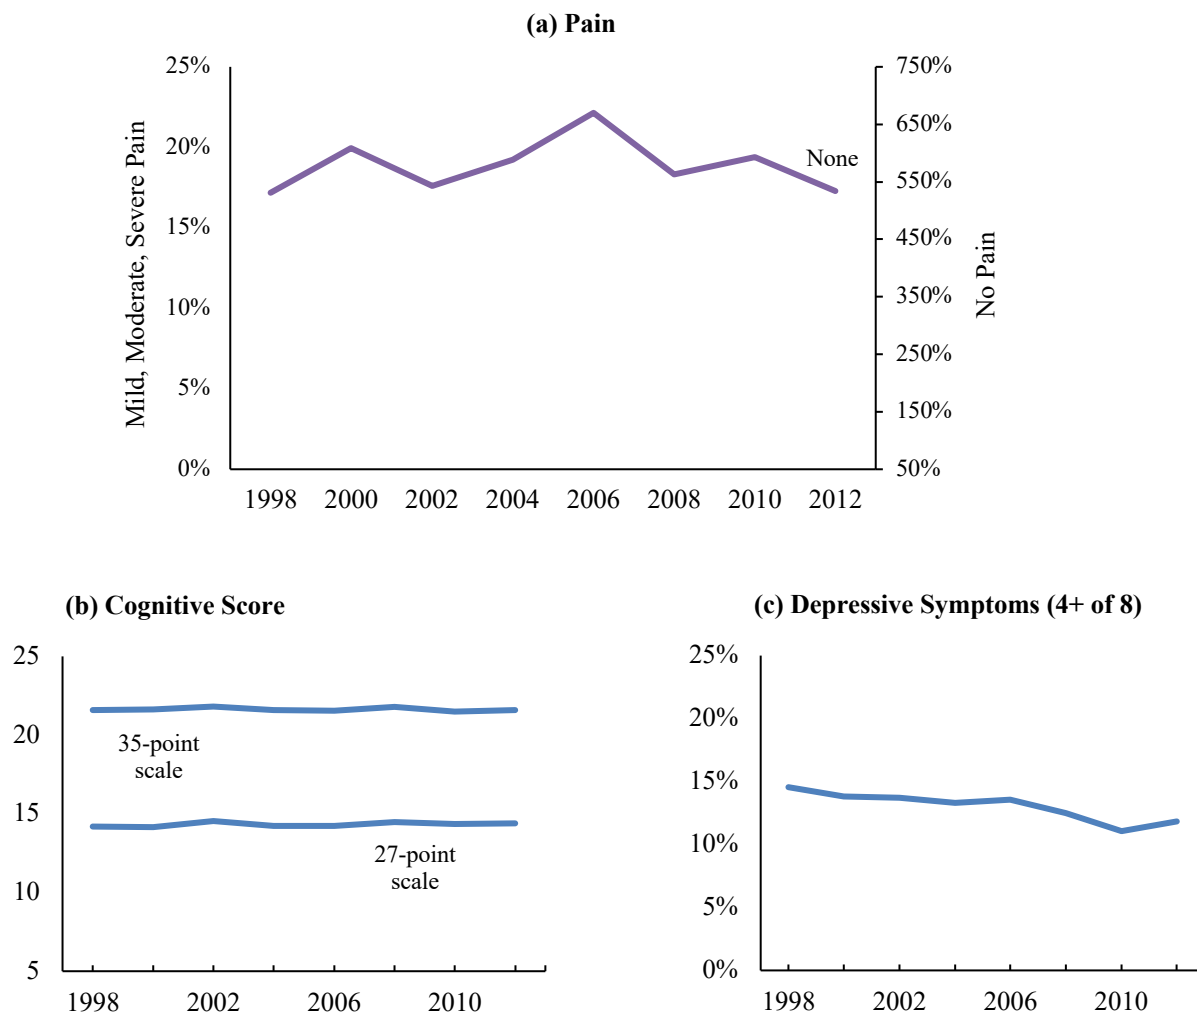

Note: Data are from the Health and Retirement Study (HRS). The sample is people aged 65 and older. The data are age-adjusted to the year 2010 using 10-year age groups.

**Figure A5: Relationships in the Health and Retirement Study (1998–2012) between Symptoms Not Available in MCBS and Impairments Measured in MCBS, Age 65+**

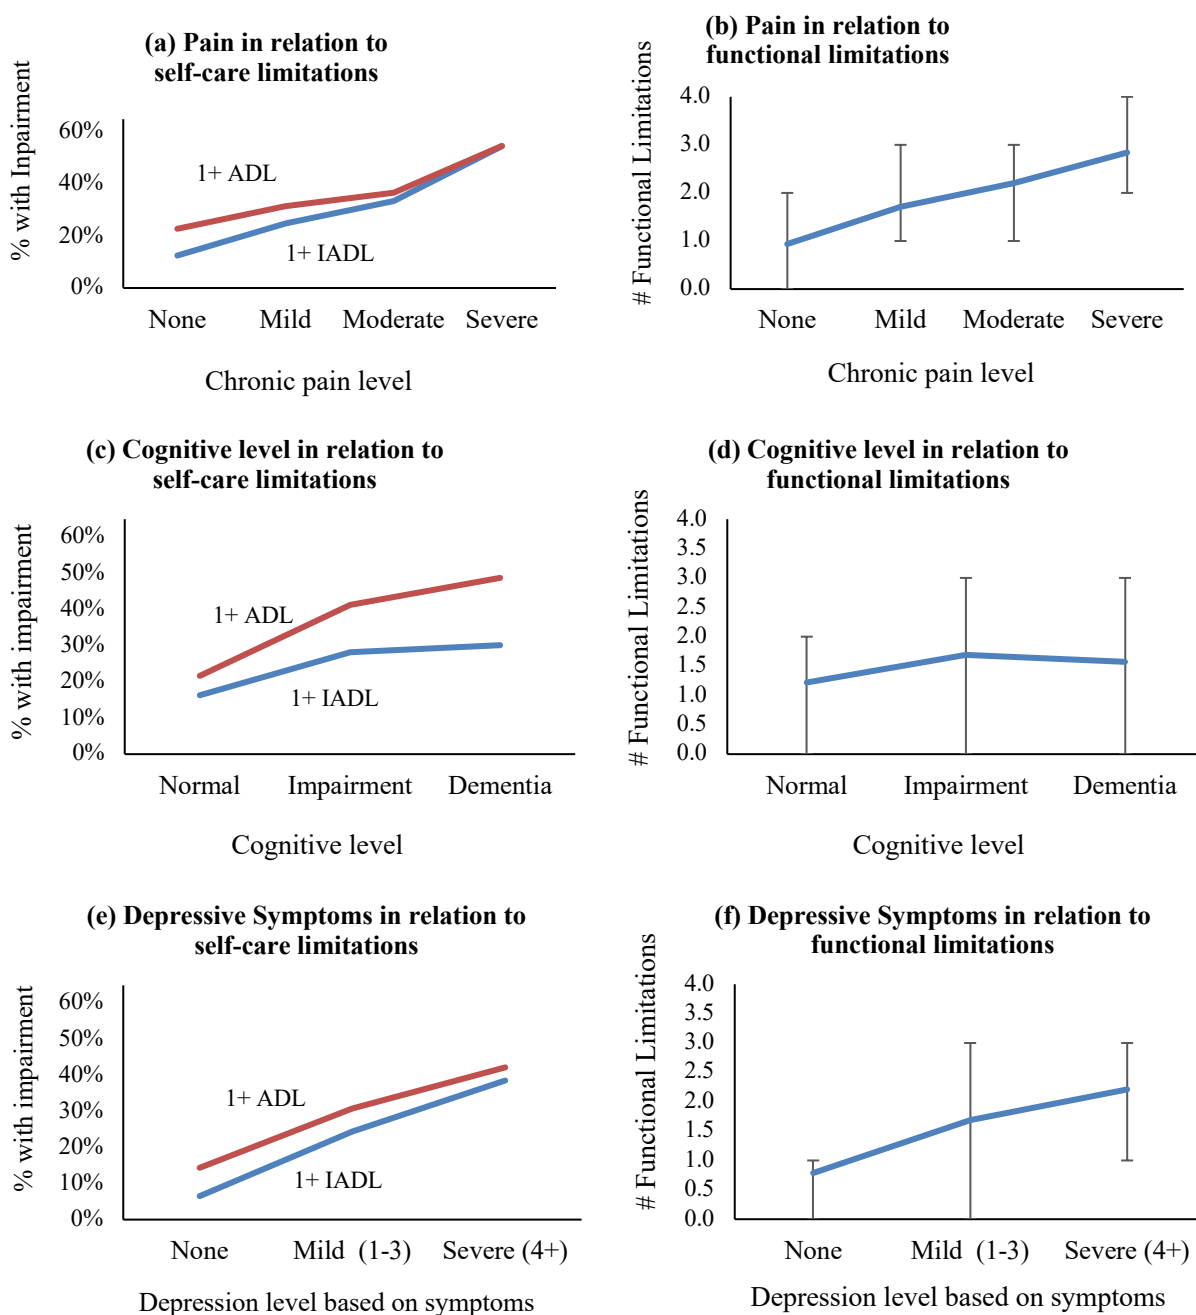

Note: Data are from the Health and Retirement Study (HRS), pooled 1998-2012 for those age 65 and older. Cutpoints for normal, cognitive impairment and dementia are constructed in a manner analogous to Langa et al. (2017), based on a 27-point cognitive scale or a proxy's assessment of the respondent's memory, whether the respondent had limitations in 5 instrumental activities of daily living (IADLs), and whether a memory problem or dementia/Alzheimer's had been diagnosed. Figures show means by category, and error bars for functional limitation figures show the interquartile range.

**Table A1: List of Covariates used in HMO Adjustment, MCBS**

|                                                         |                                                |
|---------------------------------------------------------|------------------------------------------------|
| [1] Age                                                 | [25] Inpatient nights-continuous               |
| [2] Age squared                                         | [26] Inpatient stays-continuous                |
| [3] Asthma/emphysema                                    | [27] Male                                      |
| [4] Blood cholesterol checked                           | [28] Mammogram/breast x-ray in last year       |
| [5] Blood pressure checked-categorical                  | [29] Marital status category 2*Hispanic Race   |
| [6] Routine place receive care*Employment status        | [30] Marital status category 4*Black Race      |
| [7] Health compared to 1 year ago-categorical           | [31] Marital status category 5*Hispanic Race   |
| [8] Served in armed forces                              | [32] Marital status                            |
| [9] Died in the study year                              | [33] Number of people in the household         |
| [10] Difficulty lifting/carrying 10 pounds-categorical  | [34] Pap smear in last year                    |
| [11] Difficulty stooping/crouching/kneeling-categorical | [35] Inpatient stays-squared                   |
| [12] Difficulty walking 1/4 mi                          | [36] Pneumonia vaccination                     |
| [13] Education-categorical                              | [37] Routine place receive care*Poverty status |
| [14] Ever smoked                                        | [38] Poverty Status-categorical                |
| [15] Flu shot in last year                              | [39] Any difficulty dressing                   |
| [16] Employment status-have job                         | [40] Any difficulty eating                     |
| [17] Routine place receive care                         | [41] PSA test in last year                     |
| [18] Self-reported health status-categorical            | [42] Race                                      |
| [19] Hearing                                            | [43] Poverty status category 5*Black Race      |
| [20] Wear hearing aid                                   | [44] Served in armed forces*Black Race         |
| [21] Height (cm)-continuous                             | [45] Employment status*Hispanic Race           |
| [22] Had hysterectomy                                   | [46] Inpatient stays*Hispanic Race             |
| [23] Number of days in institution-squared              | [47] Smoke now                                 |
| [24] Number of days in institution-continuous           | [48] Weight (kg)-continuous                    |

Note: an analogous set of covariates is used in the propensity score models to decompose medical spending, mortality, and quality of life decrements into the direct effect of each of the 80 conditions

**Table A2: Hosmer-Lemeshow Goodness-of-Fit Test for the Imputation Used in the HMO Adjustment, MCBS 2009**

| <b>Community Calibrated</b> | <b>Chi-Square</b> | <b>DF</b> | <b>Pr &gt; ChiSq</b> |
|-----------------------------|-------------------|-----------|----------------------|
| 1                           | 7.40              | 8         | 0.49                 |
| 2                           | 6.08              | 8         | 0.64                 |
| 3                           | 9.51              | 8         | 0.30                 |
| 4                           | 8.44              | 8         | 0.39                 |
| 5                           | 14.39             | 8         | 0.07                 |

Note: Numbers are from the 2009 MCBS community sample.

**Table A3: Complete Medicare and HMO-Adjusted Samples, MCBS 2009**

| Variables            | Full-Year Traditional         |                               |
|----------------------|-------------------------------|-------------------------------|
|                      | Medicare                      | HMO-Adjusted                  |
|                      | N=6,200<br>(Wtd N=24,283,071) | N=6,200<br>(Wtd N=36,824,486) |
| <b>Gender</b>        |                               |                               |
| Female               | 57.9%                         | 56.6%                         |
| <b>Age</b>           |                               |                               |
| 65-69                | 25.5                          | 26.8                          |
| 70-74                | 24.1                          | 24.2                          |
| 75-79                | 19.8                          | 19.2                          |
| 80-84                | 15.5                          | 14.7                          |
| ≥85                  | 15.1                          | 15.2                          |
| <b>Race</b>          |                               |                               |
| White                | 83.4                          | 80.0                          |
| Black                | 6.9                           | 8.2                           |
| Other                | 11.3                          | 11.8                          |
| <b>Education</b>     |                               |                               |
| ≤High School         | 52.9                          | 53.9                          |
| Some College         | 26.1                          | 26.2                          |
| College and above    | 21.1                          | 19.9                          |
| <b>Married</b>       | 52.6                          | 53.3                          |
| <b>Health Status</b> |                               |                               |
| Excellent            | 17.1                          | 16.5                          |
| Very good            | 30.7                          | 29.8                          |
| Good                 | 32.5                          | 32.48                         |
| Fair                 | 15.0                          | 16.1                          |
| Poor                 | 4.7                           | 5.2                           |

Note: Percentages are weighted using sample weights. Complete Medicare population is defined as: (1) no participation in a Medicare Advantage for the year of study, and (2) enrollment in Medicare parts A & B for the full 12-month study period unless the participant died during the year. Numbers are from the 2009 MCBS community sample.

**Table A4. Exclusions and Transfers to the National Health Expenditure Accounts  
to Match MCBS, 2009**

| <b>Health Care Service or Type of Expenditure</b>                           | <b>\$millions</b> |
|-----------------------------------------------------------------------------|-------------------|
| <b>Exclusions for Out-of-Scope Services or Expenditure</b>                  |                   |
| Other Non-Durable Medical Equipment <sup>a</sup>                            | \$19,327          |
| Other Personal Health Care <sup>a,d</sup>                                   | \$18,685          |
| Graduate Medical Education and Disproportionate Share Payments <sup>b</sup> | \$6,998           |
| Non-Patient Revenue <sup>a</sup>                                            | \$22,497          |
| <b>Exclusions for Out-of-Scope Populations</b>                              |                   |
| Foreign Visitors <sup>b</sup>                                               | \$700             |
| <b>Total Exclusions</b>                                                     | <b>\$68,208</b>   |
| <b>Transfers between Service Categories</b>                                 |                   |
| Hospital-Based Personal Health Care <sup>b</sup>                            | \$693             |
| Hospital-Based Home Health Care <sup>c</sup>                                | \$6,927           |
| Hospital-Based Nursing Home Care <sup>c</sup>                               | \$5,672           |
| DME provided by Physicians                                                  | \$477             |
| Rx supplied in Hospitals <sup>b</sup>                                       | \$1,187           |
| Rx supplied by Physicians <sup>b</sup>                                      | \$1,815           |
| Other Professional Services provided in Physician Offices <sup>a</sup>      | \$13,372          |
| <b>Total Transfers</b>                                                      | <b>\$30,143</b>   |

<sup>a</sup> Based on Meara, White and Cutler (2004) and Sing et al. (2006).  
<sup>b</sup> Based on Sing et al. (2006).  
<sup>c</sup> Based on Meara, White and Cutler (2004).  
<sup>d</sup> We exclude all expenditures on “Other Health, Residential and Personal Health Care” as well as hospital services that are estimated to be hospital-based Other PHC services.

**Table A5. Estimating Health-Related Quality of Life (QOL) Disutilities in MEPS**  
**[Dependent Variable: 0-100 Rating of Health, Transformed to 0-1]**

| Independent Variable                         | Description                                                                                                                                 | Coefficient | Std Error |
|----------------------------------------------|---------------------------------------------------------------------------------------------------------------------------------------------|-------------|-----------|
| Constant                                     |                                                                                                                                             | .847        | (.001)    |
| Difficulty walking – moderate                | Difficulty walking a quarter of a mile — that is, about 2 or 3 blocks*                                                                      | -.080       | (.010)    |
| Difficulty walking – severe                  |                                                                                                                                             | -.116       | (.011)    |
| Difficulty stooping/crouching/kneeling       | Difficulty stooping, crouching, or kneeling**                                                                                               | -.049       | (.008)    |
| Difficulty lifting/carrying heavy objects    | Difficulty lifting or carrying objects as heavy as 10 pounds, like a sack of potatoes**                                                     | -.030       | (.010)    |
| Difficulty reaching                          | Difficulty reaching or extending arms above shoulder level**                                                                                | -.013       | (.009)    |
| Difficulty with manual dexterity             | Difficulty either writing or handling and grasping small objects**                                                                          | -.024       | (.010)    |
| Any ADL impairment                           | Any difficulty or doesn't do: bathing or showering, dressing, walking†                                                                      | -.060       | (.018)    |
| Any IADL impairment                          | Any difficulty or doesn't do: using the telephone, managing money, preparing own meals, doing light housework, shopping for personal items† | -.072       | (.010)    |
| Difficulty seeing                            | Statement best describing vision (while wearing glasses or contact lenses): a little or a lot of trouble seeing or blind (vs. no trouble)   | -.050       | (.006)    |
| Difficulty hearing                           | Statement best describing hearing (with a hearing aid): a little or a lot of trouble hearing or deaf (vs no trouble)                        | -.038       | (.005)    |
| Health limits social interactions – moderate | How much of the time during the past month has your health                                                                                  | -.163       | (.008)    |
| Health limits social interactions – severe   | limited your social activities, like visiting with friends or close relatives (moderate: most of the time; severe: all of the time)         | -.203       | (.013)    |
| N                                            |                                                                                                                                             |             | 22,861    |
| R <sup>2</sup>                               |                                                                                                                                             |             | 0.308     |

Note: The sample is people in the 2002 Medical Expenditure Panel Survey. Regressions are weighted using sample weights and account for the sample clustering pattern. Our regression includes all symptoms and impairments, but no sociodemographic variables. We chose not to control for such factors as age, gender, race, and socioeconomic status with the belief that these affect health primarily via specific symptoms and impairments caused by acute and chronic conditions. If we had controlled for sociodemographic variables, their coefficients would also reflect the effects of symptom and impairment variables that were related to these factors but were not adequately accounted for by our models. Still, alternative analyses controlling for age, sex, and their interactions yielded similar results (Stewart et al., 2008).

\*levels: no impairment: none of the time / moderate: some of the time / severe: most of the time or all of the time

\*\*binary variable: impairment if response was some difficulty, a lot of difficulty, or unable to do (vs. no difficulty or a little difficulty)

†For ADL's and IADL's: A single question asked about all activities in MEPS, whereas there were separate questions for each activity in MCBS.

**Table A6: Disease Groups and Prevalence Rates**

| Organ System /<br>Broad category       | Detailed Conditions (80)                               | CCS Codes                                                                                             | Prevalence (Standard Error) |               |
|----------------------------------------|--------------------------------------------------------|-------------------------------------------------------------------------------------------------------|-----------------------------|---------------|
|                                        |                                                        |                                                                                                       | 1999                        | 2012          |
| Cardiovascular disease                 |                                                        |                                                                                                       |                             |               |
| 1. Ischemic heart disease              |                                                        |                                                                                                       | 34.9% (0.21%)               | 34.6% (0.28%) |
|                                        | 1. Acute myocardial infarction                         | CCS=100                                                                                               | 13.0% (0.15%)               | 12.1% (0.18%) |
|                                        | 2. Coronary atherosclerosis and other heart diseases   | CCS=101                                                                                               | 26.1% (0.19%)               | 25.6% (0.26%) |
| 2. Congestive heart failure            | 3. Congestive heart failure                            | CCS=108                                                                                               | 17.9% (0.16%)               | 13.5% (0.18%) |
| 3. Other heart and vascular disease    |                                                        |                                                                                                       | 61.8% (0.24%)               | 66.4% (0.30%) |
|                                        | 4. Cardiac arrest (includes VF)                        | CCS=107                                                                                               | 2.3% (0.07%)                | 2.9% (0.10%)  |
|                                        | 5. Peripheral vascular disease                         | CCS=114                                                                                               | 15.1% (0.16%)               | 18.5% (0.23%) |
|                                        | 6. Other cardiovascular diseases                       | CCS=96-97, CCS=103 and ICD ne 415, CCS=104-105; 2009 CCS definition: also include CCS=663 and ICD=425 | 26.8% (0.2%)                | 28.9% (0.28%) |
|                                        | 7. Other vascular diseases                             | CCS=115-117, CCS=118 and ICD ne 452, 453, CCS=119-121                                                 | 26.3% (0.21%)               | 36.5% (0.29%) |
|                                        | 8. Pulmonary embolism                                  | ICD=415                                                                                               | 2.6% (0.07%)                | 4.7% (0.12%)  |
|                                        | 9. Deep vein thrombosis                                | ICD=452, 453                                                                                          | 4.4% (0.09%)                | 6.1% (0.14%)  |
|                                        | 10. Atrial fibrillation /Arrhythmia                    | ICD='427.31', '427.32'                                                                                | 27.9% (0.2%)                | 30.7% (0.27%) |
| 4. Strokes and cerebrovascular disease |                                                        |                                                                                                       | 20.1% (0.19%)               | 22.2% (0.25%) |
|                                        | 11. Cerebrovascular disease                            | CCS=109 and ICD=346, 436, or CCS 110-113                                                              | 13.7% (0.16%)               | 17.0% (0.22%) |
|                                        | 12. Stroke                                             | CCS=109 and ICD9=430-432, CCS=109 and ICD9=433-434                                                    | 8.6% (0.12%)                | 8.7% (0.15%)  |
| 5. Cardiovascular risk factors         |                                                        |                                                                                                       | 81.9% (0.20%)               | 86.1% (0.23%) |
|                                        | 13. Diabetes mellitus                                  | CCS=49, 50                                                                                            | 20.9% (0.2%)                | 36.3% (0.31%) |
|                                        | 14. Hyperlipidemia                                     | CCS=53                                                                                                | 47.1% (0.23%)               | 66.3% (0.30%) |
|                                        | 15. Hypertension                                       | CCS=98, 99                                                                                            | 57.3% (0.24%)               | 73.0% (0.29%) |
|                                        | 16. Undiagnosed diabetes, hypertension, hyperlipidemia | NHANES                                                                                                | 12.1% (0.06%)               | 4.4% (0.02%)  |
| Cancer                                 |                                                        |                                                                                                       |                             |               |
| 6. Lung cancer                         | 17. Lung cancer                                        | CCS=19                                                                                                | 2.0% (0.07%)                | 1.6% (0.07%)  |
| 7. Colorectal cancer                   | 18. Colorectal cancer                                  | CCS=14, 15                                                                                            | 3.1% (0.08%)                | 4.0% (0.11%)  |
| 8. Prostate cancer                     | 19. Prostate cancer                                    | CCS=29                                                                                                | 5.1% (0.11%)                | 5.9% (0.13%)  |
| 9. Breast cancer                       | 20. Breast cancer                                      | CCS=24                                                                                                | 4.6% (0.1%)                 | 6.0% (0.14%)  |

Table A6 (continued)

| Organ System /<br>Broad category                |                        |                                                                                                                                                                                                                                                                                                                        | Prevalence (Std Error) |                      |
|-------------------------------------------------|------------------------|------------------------------------------------------------------------------------------------------------------------------------------------------------------------------------------------------------------------------------------------------------------------------------------------------------------------|------------------------|----------------------|
|                                                 |                        |                                                                                                                                                                                                                                                                                                                        | 1999                   | 2012                 |
| <b>10. Other cancers and neoplasms</b>          |                        |                                                                                                                                                                                                                                                                                                                        | <b>34.7% (0.22%)</b>   | <b>44.2% (0.31%)</b> |
|                                                 | 21. Skin cancer        | CCS=23                                                                                                                                                                                                                                                                                                                 | 7.7% (0.13%)           | 14.0% (0.22%)        |
|                                                 | 22. Hematologic cancer | CCS=37, 38, 39, 40                                                                                                                                                                                                                                                                                                     | 1.2% (0.05%)           | 1.9% (0.08%)         |
|                                                 | 23. Benign neoplasm    | CCS=46, 47                                                                                                                                                                                                                                                                                                             | 15.7% (0.17%)          | 24.2% (0.26%)        |
|                                                 | 24. Other cancers      | CCS=11-13,16-18, 20-22, 25, 27, 28, 30-36, 41-45                                                                                                                                                                                                                                                                       | 19.1% (0.18%)          | 24.6% (0.28%)        |
| <b>Mental Health</b>                            |                        |                                                                                                                                                                                                                                                                                                                        |                        |                      |
| <b>11. Dementia</b>                             | 25. Dementia           | 2008 CCS definition: CCS=68 and ICD ne 293, 331.83; 2009 CCS definition: CCS=653 and ICD ne 293; or CCS=670 and ICD=310                                                                                                                                                                                                | <b>10.8% (0.14%)</b>   | <b>12.3% (0.17%)</b> |
| <b>12. Mental health and drug/tobacco abuse</b> |                        |                                                                                                                                                                                                                                                                                                                        | <b>34.7% (0.23%)</b>   | <b>44.2% (0.29%)</b> |
|                                                 | 26. Depression         | 2008 CCS definition: ICD=311, 296.2(x), 296.3(x); 2009 CCS definition: ICD=311, 296.2(x), 296.3(x)                                                                                                                                                                                                                     | 10.2% (0.14%)          | 14.2% (0.21%)        |
|                                                 | 27. Bipolar disorder   | 2008 CCS definition: ICD=296.0(x), 296.1(x), 296.4(x), 296.5(x), 296.6(x), 296.7(x), 296.80, 296.89<br>2009 CCS definition: ICD=296.0(x), 296.1(x), 296.4(x), 296.5(x), 296.6(x), 296.7(x), 296.80, 296.89                                                                                                             | 1.2% (0.05%)           | 2.9% (0.10%)         |
|                                                 | 28. Schizophrenia      | 2008 CCS definition: CCS=70, 71; 2009 CCS definition: CCS=659 and ICD=295, 297, 298.1, 298.2, 298.3, 298.4, 298.8, 298.9; or CCS=655 and ICD=299                                                                                                                                                                       | 5.6% (0.11%)           | 5.5% (0.13%)         |
|                                                 | 29. Drug/alcohol       | 2008 CCS definition: CCS=66 ; 2009 CCS definition: CCS=660 and ICD=291, 303, 305 or 980 ; 2008 CCS definition: CCS=67 and ICD ne V15.82, 305.1(x) ; 2009 CCS definition: CCS=661 and ICD=292, 304, 305 2008 CCS definition: CCS=67 and ICD=305.1(x), V15.82 ; 2009 CCS definition: If CCS=663 and ICD=305.1(x), V15.82 | 8.7% (0.14%)           | 18.0% (0.24%)        |

Table A6 (continued)

| Organ System /<br>Broad category | Detailed Conditions (80) | CCS Codes                                                                                                                                                                                                                                                                                                                                                                                                                                                                                                                                                                                                                                                                                                                                                                | Prevalence (Std Error) |               |
|----------------------------------|--------------------------|--------------------------------------------------------------------------------------------------------------------------------------------------------------------------------------------------------------------------------------------------------------------------------------------------------------------------------------------------------------------------------------------------------------------------------------------------------------------------------------------------------------------------------------------------------------------------------------------------------------------------------------------------------------------------------------------------------------------------------------------------------------------------|------------------------|---------------|
|                                  |                          |                                                                                                                                                                                                                                                                                                                                                                                                                                                                                                                                                                                                                                                                                                                                                                          | 1999                   | 2012          |
|                                  | 30. Anxiety/PTSD         | 2008 CCS definition: CCS=73 and ICD=312, 314<br>2009 CCS definition: CCS=652 and ICD=312, 314                                                                                                                                                                                                                                                                                                                                                                                                                                                                                                                                                                                                                                                                            | 8.9% (0.13%)           | 14.5% (0.20%) |
|                                  | 31. Mental health        | 2008 CCS definition: CCS=65 ; 2009 CCS definition : CCS=654 and ICD=317, 318, 319<br>2008 CCS definition: CCS=68 and ICD=293, 331.83; or CCS=69 and ICD=301, 298; or CCS=69 and ICD=296.81, 296.82, 296.9(x); or CCS=72 and ICD=301, 307, 312, 327; or CCS=73 and ICD=309.21, 313; or CCS=74 and ICD ne 300, 311; or CCS=75; 2009 CCS definition: CCS=95 and ICD=327, 331.83; CCS=650, 656, 658; or CCS=651 and ICD=293, 313; or CCS=652 and ICD=313; or CCS=654 and ICD=307, 315, V40; or CCS=655 and ICD=307, 309.21, 313; or CCS=657 and ICD=296.81, 296.82, 296.9(x); or CCS=659 and ICD=298.0; or CCS=663 and ICD=V11(x), V15.4, V15.41, V15.42, V15.49, V66, V70, V71, V79; or CCS=670 and ICD=293, 302, 306, 307, 316, V40, V67; or CCS=653, 657, 659 and ICD=293 | 8.0% (0.14%)           | 10.3% (0.17%) |

Table A6 (continued)

| Organ System /                         |                                                       | CCS Codes                                                                                                                                                                       | Prevalence (Std Error) |               |
|----------------------------------------|-------------------------------------------------------|---------------------------------------------------------------------------------------------------------------------------------------------------------------------------------|------------------------|---------------|
| Broad category                         | Detailed Conditions (80)                              |                                                                                                                                                                                 | 1999                   | 2012          |
| Diseases of the Central Nervous System |                                                       |                                                                                                                                                                                 |                        |               |
| 13. Major disease of the CNS           |                                                       |                                                                                                                                                                                 | 35.7% (0.22%)          | 44.8% (0.28%) |
|                                        | 32. Seizure disorders                                 | CCS=83                                                                                                                                                                          | 6.2% (0.11%)           | 5.3% (0.13%)  |
|                                        | 33. Other disease of the central nervous system (CNS) | CCS=81, 85, 95; 2009 CCS definition: CCS= 81, 85, CCS=95 if ICD ne 327, 331.83, CCS=663 and ICD=333, 357                                                                        | 19.6% (0.19%)          | 34.2% (0.28%) |
|                                        | 34. Parkinson's disease, MS, Paralysis                | CCS=79, CCS=80, CCS=82                                                                                                                                                          | 8.8% (0.13%)           | 9.3% (0.17%)  |
| 14. Eye, ear and other disease of CNS  |                                                       |                                                                                                                                                                                 | 69.4% (0.22%)          | 74.2% (0.28%) |
|                                        | 35. Otitis media                                      | CCS=92                                                                                                                                                                          | 6.7% (0.12%)           | 6.2% (0.14%)  |
|                                        | 36. Cataract                                          | CCS=86                                                                                                                                                                          | 35.4% (0.24%)          | 41.3% (0.30%) |
|                                        | 37. Glaucoma                                          | CCS=88                                                                                                                                                                          | 14.6% (0.17%)          | 19.4% (0.25%) |
|                                        | 38. Eye disorders                                     | CCS=87, 89-91                                                                                                                                                                   | 38.8% (0.24%)          | 46.3% (0.31%) |
|                                        | 39. Vestibular disorders                              | CCS=93                                                                                                                                                                          | 12.0% (0.16%)          | 12.7% (0.20%) |
|                                        | 40. Other ear disorders                               | CCS=94                                                                                                                                                                          | 14.0% (0.17%)          | 16.3% (0.20%) |
|                                        | 41. Headache/migraine                                 | CCS=84                                                                                                                                                                          | 10.5% (0.16%)          | 12.8% (0.22%) |
| Respiratory Disease                    |                                                       |                                                                                                                                                                                 |                        |               |
| 15. Respiratory symptoms, COPD, asthma |                                                       |                                                                                                                                                                                 | 60.1% (0.25%)          | 63.2% (0.33%) |
|                                        | 42. Acute respiratory infection                       | CCS=124-126                                                                                                                                                                     | 26.1% (0.21%)          | 26.8% (0.28%) |
|                                        | 43. Respiratory symptoms                              | CCS=133                                                                                                                                                                         | 30.6% (0.22%)          | 36.2% (0.30%) |
|                                        | 44. Other respiratory diseases                        | CCS=130-132, 134                                                                                                                                                                | 20.9% (0.20%)          | 25.3% (0.26%) |
|                                        | 45. Chronic obstructive pulmonary disease             | CCS=127                                                                                                                                                                         | 18.1% (0.18%)          | 18.5% (0.22%) |
|                                        | 46. Asthma                                            | CCS=128                                                                                                                                                                         | 11.3% (0.15%)          | 13.8% (0.20%) |
| 16. Infectious disease                 |                                                       |                                                                                                                                                                                 | 37.1% (0.23%)          | 37.4% (0.25%) |
|                                        | 47. Pneumonia (non-TB, non-STD)                       | CCS=122, 129                                                                                                                                                                    | 11.5% (0.14%)          | 9.7% (0.16%)  |
|                                        | 48. Influenza                                         | CCS=123                                                                                                                                                                         | 4.4% (0.09%)           | 2.5% (0.10%)  |
|                                        | 49. Infectious disease                                | CCS=1; CCS=9; CCS=5; CCS=2, 3, 4, 7, 8, 76, 77, 78, 201                                                                                                                         | 27.4% (0.21%)          | 30.5% (0.28%) |
| Kidney disease                         |                                                       |                                                                                                                                                                                 |                        |               |
| 17. Chronic renal failure, ESRD        | 50. Chronic renal failure or end-stage renal disease  | ESRD Condition ne 1 and (CCS=158 and ICD ne V420, 585.6) ICD diagnosis code=V420; ICD proc code= 5561, 5569; HCPCS=50360, 50365, 50380, S2065; and/or MCBS: h_medsta=11, 21, 31 | 4.4% (0.08%)           | 17.4% (0.23%) |
| 18. Acute renal failure                | 51. Acute renal failure                               | CCS=157                                                                                                                                                                         | 5.3% (0.1%)            | 9.3% (0.17%)  |

Table A6 (continued)

| Organ System /<br>Broad category  | Detailed Conditions (80)                 | CCS Codes                                                                                                                                      | Prevalence (Std Error) |               |
|-----------------------------------|------------------------------------------|------------------------------------------------------------------------------------------------------------------------------------------------|------------------------|---------------|
|                                   |                                          |                                                                                                                                                | 1999                   | 2012          |
| 19. Other genitourinary disease   |                                          |                                                                                                                                                | 55.3% (0.24%)          | 59.1% (0.31%) |
|                                   | 52. Hyperplasia of the Prostate          | CCS=164                                                                                                                                        | 12.5% (0.15%)          | 15.7% (0.22%) |
|                                   | 53. Genitourinary                        | CCS=156, 160-162, CCS=163 and ICD ne 788.3(x), CCS=165-172, 174, 175; CCS=159, ICD = 788.3(x)                                                  | 48.9% (0.24%)          | 53.4% (0.31%) |
| 20. Frailty                       |                                          |                                                                                                                                                | 42.9% (0.24%)          | 40.5% (0.26%) |
|                                   | 54. Functional limitations (moderate)    | —                                                                                                                                              | 34.3% (0.23%)          | 33.6% (0.28%) |
|                                   | 55. Functional limitations (severe)      | —                                                                                                                                              | 7.8% (0.11%)           | 6.2% (0.13%)  |
| Musculoskeletal                   |                                          |                                                                                                                                                |                        |               |
| 21. Arthritis and musculoskeletal |                                          |                                                                                                                                                | 78.1% (0.21%)          | 82.4% (0.24%) |
|                                   | 56. Hip fracture                         | CCS=226                                                                                                                                        | 4.0% (0.13%)           | 4.1% (0.17%)  |
|                                   | 57. Gout and other crystal arthropathies | CCS=54                                                                                                                                         | 6.6% (0.13%)           | 8.8% (0.18%)  |
|                                   | 58. Rheumatoid arthritis                 | CCS=202                                                                                                                                        | 12.2% (0.15%)          | 6.7% (0.17%)  |
|                                   | 59. Osteoarthritis                       | CCS=203                                                                                                                                        | 41.1% (0.22%)          | 48.6% (0.29%) |
|                                   | 60. Back Pain                            | CCS=205                                                                                                                                        | 25.8% (0.21%)          | 35.8% (0.29%) |
|                                   | 61. Osteoporosis                         | CCS=206                                                                                                                                        | 14.9% (0.18%)          | 14.8% (0.19%) |
|                                   | 62. Other rheumatic disease              | CCS=204, 208-212                                                                                                                               | 47.1% (0.25%)          | 59.7% (0.32%) |
| 22. Injury                        |                                          |                                                                                                                                                | 44.0% (0.24%)          | 48.5% (0.31%) |
|                                   | 63. General trauma                       | CCS=225, 227, 232-236, 239                                                                                                                     | 39.9% (0.25%)          | 45.8% (0.28%) |
|                                   | 64. Accidents and E-codes                | CCS=207, 228-231, 226, 237; CCS=238 and ICD ne 415; CCS=240-244, 259, 260-262 2009 CCS definition: also CCS=661 and ICD=965, V65; also CCS=662 | 11.9% (0.16%)          | 15.9% (0.19%) |
| Endocrine, GI, Liver, Hematologic |                                          |                                                                                                                                                |                        |               |
| 23. Other endocrine               |                                          |                                                                                                                                                | 46.7% (0.24%)          | 59.9% (0.29%) |
|                                   | 65. Other endocrine disease              | CCS=51, 52, 55-58                                                                                                                              | 27.3% (0.22%)          | 45.1% (0.30%) |
|                                   | 66. Thyroid disorders                    | CCS=48                                                                                                                                         | 19.7% (0.20%)          | 29.8% (0.27%) |
|                                   | 67. Reproductive (female)                | CCS=173                                                                                                                                        | 11.2% (0.16%)          | 8.8% (0.18%)  |

Table A6 (continued)

| Organ System /<br>Broad category                         | Detailed Conditions<br>(80)                            | CCS Codes                                                                                                                                                                                                                                                                                                                                                                                                                                 | Prevalence (Std Error) |                      |
|----------------------------------------------------------|--------------------------------------------------------|-------------------------------------------------------------------------------------------------------------------------------------------------------------------------------------------------------------------------------------------------------------------------------------------------------------------------------------------------------------------------------------------------------------------------------------------|------------------------|----------------------|
|                                                          |                                                        |                                                                                                                                                                                                                                                                                                                                                                                                                                           | 1999                   | 2012                 |
| <b>24. Gastrointestinal and liver disease</b>            | 68. Gastrointestinal and Liver                         | CCS=6, CCS=138 and ICD=456, CCS=150, 151; 2009 CCS definition: also include CCS=663 and ICD=571 (Previously CCS=150).<br>CCS=149, CCS=153, CCS=135-137, 141-148, 152, 154, 155; CCS=138 and ICD='530', CCS=139, 140; 2009 CCS definition: also include CCS=663 and ICD=535.                                                                                                                                                               | 50.7% (0.80%)          | 56.7% (1.03%)        |
| <b>25. Hematologic</b>                                   |                                                        |                                                                                                                                                                                                                                                                                                                                                                                                                                           | <b>29.5% (0.22%)</b>   | <b>34.8% (0.29%)</b> |
|                                                          | 69. Anemias                                            | CCS=59-61                                                                                                                                                                                                                                                                                                                                                                                                                                 | 22.5% (0.19%)          | 28.6% (0.26%)        |
|                                                          | 70. Other hematologic disease                          | CCS=62-64                                                                                                                                                                                                                                                                                                                                                                                                                                 | 9.4% (0.13%)           | 12.3% (0.19%)        |
| <b>Miscellaneous</b>                                     |                                                        |                                                                                                                                                                                                                                                                                                                                                                                                                                           |                        |                      |
| <b>26. After Care</b>                                    | 71. After Care                                         | CCS=257                                                                                                                                                                                                                                                                                                                                                                                                                                   | 24.2% (0.20%)          | 45.5% (0.29%)        |
| <b>27. General Symptoms and other disease</b>            |                                                        |                                                                                                                                                                                                                                                                                                                                                                                                                                           | <b>73.4% (0.22%)</b>   | <b>79.4% (0.28%)</b> |
|                                                          | 72. Dermatologic disease                               | CCS=197-200                                                                                                                                                                                                                                                                                                                                                                                                                               | 37.2% (0.23%)          | 45.6% (0.29%)        |
|                                                          | 73. Birth defects                                      | CCS=218-224; 2009 CCS definition: also include CCS=660 and ICD=760; CCS= 661 and ICD=760, 779                                                                                                                                                                                                                                                                                                                                             | 9.5% (0.13%)           | 8.8% (0.17%)         |
|                                                          | 74. Signs and symptoms                                 | CCS=102, CCS=245, CCS=246, CCS=247, CCS=248, CCS=249, CCS=250-255, CCS=259                                                                                                                                                                                                                                                                                                                                                                | 59.2% (0.25%)          | 68.0% (0.30%)        |
| <b>Prevention and Screening</b>                          |                                                        |                                                                                                                                                                                                                                                                                                                                                                                                                                           |                        |                      |
| <b>28. Immunization and infectious disease screening</b> | 75. Immunizations and screening for infectious disease | CCS=10, Cancer Screening (ICD9= 'V761', 'V7610', 'V7611', 'V7612', 'V7641', 'V7651', 'V7644', 'V762', 'V7647', '8737', '8764', CPT Codes- '76083', '76085', '76092', '77052', '77057', 'G0202', 'G0203', 'G0107', 'G0328', '82270', 'G0104', 'G0105', 'G0106', 'G0121', 'G0106', 'G0120', 'G0122', '74263', 'G0102', 'G0103', 'G0123', 'G0124', 'G0141', 'G0143', 'G0144', 'G0145', 'G0147', 'G0148', 'P3000', 'P3001', 'Q0091', 'G0101') | 47.5% (0.24%)          | 57.2% (0.29%)        |

Table A6 (continued)

| Organ System /              |                                  |                                                                                                                                                                                                                                                                                                                                 | Prevalence (Std Error) |                      |
|-----------------------------|----------------------------------|---------------------------------------------------------------------------------------------------------------------------------------------------------------------------------------------------------------------------------------------------------------------------------------------------------------------------------|------------------------|----------------------|
| Broad category              | Detailed Conditions (80)         | CCS Codes                                                                                                                                                                                                                                                                                                                       | 1999                   | 2012                 |
| <b>29. Cancer screening</b> |                                  |                                                                                                                                                                                                                                                                                                                                 | <b>41.1% (0.24%)</b>   | <b>45.2% (0.29%)</b> |
|                             | 76. Screening: Breast cancer     | CPT: 76083,76085,76092,77052,77057<br>HCPCS: G0202, G0203<br>ICD-9 Diagnosis: V76.1, V76.10, V76.11, V76.12<br>ICD-9 procedure: 87.37                                                                                                                                                                                           | 20.4% (0.24%)          | 22.6% (0.24%)        |
|                             | 77. Screening: Colorectal cancer | Fecal Occult Blood Tests (FOBT) CPT: 82270<br>HCPCS: G0107, G0328<br>Sigmoidoscopy HCPCS: G0104, G0105, G0106<br>ICD-9 Diagnosis: V76.41<br>Colonoscopy HCPCS: G0105, G0121<br>ICD-9 Diagnosis: V76.51, V76.41<br>Double Contrast Barium Enema (DCBE) HCPCS: G0106, G0105, G0120, G0122<br>CPT: 74263<br>ICD-9 procedure: 87.64 | 20.7% (0.22%)          | 14.2% (0.22%)        |
|                             | 78. Screening: Prostate cancer   | HCPCS: G0103, G0102 ICD-9 Diagnosis: V76.44                                                                                                                                                                                                                                                                                     | 6.1% (0.11%)           | 13.4% (0.21%)        |
|                             | 79. Screening: Cervical cancer   | HCPCS: G0123, G0124, G0141, G0143, G0144, G0145, G0147, G0148, P3000, P3001, Q0091, G0101 ICD-9 Diagnosis: V76.2, V76.47                                                                                                                                                                                                        | 9.7% (0.17%)           | 9.3% (0.17%)         |
| <b>30. Well Care</b>        | 80. Well Care                    | CCS=256 & CCS=258                                                                                                                                                                                                                                                                                                               | 33.7% (0.28%)          | 38.4% (0.28%)        |

Note: The table shows prevalence rates for the 80 conditions and 30 aggregated groups. The 95% confidence intervals were calculated using 1000 bootstrap samples.

## Appendix B: Models for Medical Spending and Health Outcomes

This appendix provides more detail on the models attributing spending and health outcomes to conditions. **Figure B1** shows a schematic for our productivity analysis. The analysis has three parts: (1) estimating the direct effect of each condition on medical spending and health and smoothing these estimates over time; (2) transferring dollars and health decrements from direct conditions to risk factors; and (3) using the resulting data to estimate changes in medical spending and QALE over time. We present these analytic steps first and then discuss other estimation issues.

### B.1 Estimating the Direct Effect of Each Condition

The first step is to decompose medical spending, mortality, and quality of life decrements into the direct effect of each of the 80 conditions. For each of spending, mortality, and quality of life, we have an estimate of the total in the population as a whole: per capita medical spending, the mortality rate, and the quality of life decrement. Using the notation in the paper, these are  $m_{ave,t} = \mathbf{prev}_t \cdot \mathbf{m}_t$ ;  $\Gamma_t = \mathbf{prev}_t \cdot \gamma_t$ ; and  $H_t = \bar{H}_t - \mathbf{prev}_t \cdot \mathbf{h}_t$ . We also have prevalence of each condition,  $\mathbf{prev}_t$ , using the process laid out in Appendix A.4 and demonstrated on the left hand side of **Figure B1**. The issue is to estimate  $\mathbf{m}_t$ ,  $\gamma_t$ , and  $\mathbf{h}_t$ .

We do so using a propensity score model. We model the probability of having each condition as a function of the  $\mathbf{z}_i$  variables in **Table A1** and the other 79 conditions as controls, excluding only those variables that have a deterministic or extremely tight correlation with the condition of the interest. **Table B1** shows the exceptions that we make. For example, while forming the strata for hypertension we leave out undiagnosed diabetes/hypertension/hyperlipidemia as covariates. Other than these exceptions, we include all of other conditions because none of these health conditions are perfectly correlated with each other. Thus, the occurrence or non-occurrence of any one disease may be possible regardless of occurrences of other health conditions.

We group those with and without each condition into five strata and estimate the impact of having the condition on medical spending, mortality, and quality of life decrement using within-strata differences. We estimate spending for all 80 conditions and mortality and quality of life decrements for conditions with a direct impact on health. We use five strata with a few exceptions as shown in **Figure B2**. These conditions are mostly low prevalence and using five strata leads to outliers/influential points that bias the mean rates within strata. We chose propensity score subclassification or stratification over 1:N matching or weighting for several reasons. First, the

low prevalence rate and depending upon the caliper used to define matches and number controls for each case, many eligible controls that are quite close on the propensity score might be excluded and thereby increase the sampling variance. Similarly, for the low prevalence rate health conditions, the weights (inverse of the propensity score or its complement) may be too unstable, especially with a few subjects having very small or large propensity scores. The subclassification approach is a less sensitive to this volatility and allows the use of all cases and controls in the estimation. Furthermore, Rosenbaum and Rubin (1984) show that five strata are more than enough to reduce the F-ratio measuring the extent of imbalances between the two subgroups (those with or without the indicated condition). We computed these F-ratios routinely and monitored for all health conditions.

We estimate the balance of the propensity score models in two ways. **Figure B3** shows the histogram of joint p-values for the joint F-test of equality between treatment and controls for covariates included in the matching. The sample here is all 80 conditions in all years,  $N=1120$ . The overall F-statistic fails to reject equality of the means between cases and controls for all tests, implying good balance. We also examined the balance on several covariates that were omitted from the propensity score matching because they were judged unlikely to affect spending. These include having a regular place of medical care, having employer-sponsored insurance, total out-of-pocket payments, total uncollected liability, having Medicaid drug coverage, and living in a rural area. **Figure B4** shows the histogram of joint p-values for the joint F-test of equality between treatment and controls for the omitted covariates. The sample is again all 1,120 condition-year observations. The overall F-statistic fails to reject equality of the means between cases and controls for these omitted covariates. We have also calculated the absolute standardized mean differences (Cohen, 1988; Austin, 2009; Normand et al., 2001) for each of the six omitted variables for all 80 medical conditions. **Figure B5** shows absolute standardized mean difference (SMD) for the omitted covariates for the 80 conditions in 1999. The absolute  $SMD < 0.1$  or absolute  $SMD < 0.20$  reflect good balance between the treatment and control group. We also performed Hosmer-Lemeshow goodness of fit tests to assess our logistic regression models used in computing the propensity scores.

Because the propensity scores are not linked across conditions, the estimates summed across conditions do not necessarily add to the total. **Table B2** shows these relative totals. For example, the mortality rate implied by adding across conditions is about 50% above actual

aggregate mortality. The gap increases slightly in the first few years and is relatively flat thereafter. We thus do an adjustment to ensure that our condition-specific estimates add to national totals.

We start with the adjustment for mortality. Effectively, our mortality adjustment takes the mortality for each condition as relative mortality and uses the relative mortality to divvy up total mortality to conditions. Denote the weighted difference between treatments and controls by  $\hat{\theta}_{ct}^{\gamma}$ , where  $\gamma$  denotes mortality,  $c$  is the condition, and  $t$  is the year. The total mortality rate is allocated to conditions based on these relative mortality rates:  $\hat{\gamma}_{ct} = \Gamma_t \cdot \left( \frac{\hat{\theta}_{ct}^{\gamma}}{\sum_c \hat{\theta}_{ct}^{\gamma}} \right)$ , where  $\Gamma_t$  is the aggregate mortality rate in the relevant year. Since mortality rates vary greatly by age, we estimate this adjustment separately for three age groups: 65-74, 75-84, and 85+. This ensures that we match the total for each of these groups individually. **Table B3** shows the summary estimates of mortality for all 80 conditions.

For quality of life, the weighted value across conditions is within 5% of the total quality of life decrement in the population. Thus, no adjustment is needed to the  $\hat{\theta}_{ct}^h$  estimates. **Table B4** shows the summary estimates of quality of life decrements for all 80 conditions.

To allocate spending to conditions, we use a somewhat more complex model. The reason for this is the wide distribution of medical spending across people. When we add up the condition-specific spending to individuals, the distribution of predicted spending across individuals is far less variable than is the distribution of actual spending in the population. This is shown in **Figure B6**. Effectively, high spenders do not have different conditions than low or moderate spenders; rather, they have the same conditions but require much more care than low or moderate spenders. Accordingly, we fit a second stage model where we adjust condition-specific spending to better fit high spenders. We do this with a regression model of the form:

$$m_{it} = \hat{\theta}_{it}^m \cdot (\mathbf{X}_{it} \boldsymbol{\alpha}_t) + \varepsilon_{it} . \quad (7)$$

where  $m_{it}$  is actual spending for the individual,  $\hat{\theta}_{it}^m$  is the sum of condition-specific spending added to the person level, and  $\mathbf{X}_{it}$  is a series of variables capturing high use of services. The coefficients from the model are reported in **Table B5**. Greater use of services is associated with higher actual spending, conditional on predicted spending.

Equation (7) gives an adjustment factor for each person. To translate these into adjustments for each condition, we take the average adjustment factor for individuals with that condition. This disease-specific adjustment factor is multiplied by the spending estimate from the first step. As

above, we average across five multiple imputed data sets using proc mianalyze in SAS 9.4. **Table B6** shows the summary estimates of spending for all 80 conditions.

After estimating the per-case cost, mortality rate, and quality of life decrement, we smooth these estimates over years using a second-order polynomial for all 80 medical conditions. **Figure 5** in the paper shows an example for ischemic heart disease. To test the importance of smoothing, we compare the change in cost per case using predicted values in 1999 and 2012 versus the average of actual values in 1999-01 and 2010-12. This comparison is discussed in Appendix C.

## **B.2 Transferring from Direct Conditions to Risk Factors**

The third step adjusts spending from direct conditions to risk factor conditions. We start by determining the relationship between risk factors and direct conditions, based on our reading of the clinical literature and discussions with physician advisors. The risk factors that we consider and the direct conditions they affect are shown in **Figure 4** of the paper.

To determine the amount to be reallocated, we estimate a regression model for each of the identified final conditions as a function of the relevant risk factor conditions, controlling also for the demographic characteristics in Table 1 of the paper. Implicitly, our models give a relative risk for each risk factor—the probability of having the condition given that a person has the risk factor relative to this probability for people without the risk factor. For many risk factor-condition pairs, there are estimates of these relative risks in the clinical literature. **Table B7** shows a comparison of the relative risks we estimate to those in the literature. In general, our relative risks are a little smaller than the literature, but of the same order of magnitude. Since our estimates come from a common set of models, we use our estimates throughout.

To understand the adjustment we make, consider the example in the paper. Pooling 1999-2001, our regression estimate is that people with hypertension are 7.5 percentage points more likely to have heart disease than are people without hypertension. At that time, 57% of people had hypertension and 35% of people had ischemic heart disease. This implies that 12% of cases of ischemic heart disease are due to hypertension ( $7.5\% \times 57\% / 35\%$ ). Thus, we reduce the prevalence of heart disease by 12%. We make an offsetting entry in the hypertension industry. We demonstrate the example with spending. People with heart disease spend on average \$1,100 per person more than similar people without heart disease. We therefore transfer \$1,100 per transferred case to the hypertension industry. This amounts to \$47 per person with hypertension ( $\$1,100 \times$

7.5% x 57%), which gets added to the direct spending on hypertension, estimated as above.

Because the prevalence of some diseases differs meaningfully by age group, the example described in the previous paragraph is conducted separately for each of three age groups: 65-74, 75-84, and 85+. **Table B8** show the inflow-outflow of spending per capita and mortality rates across conditions, aggregated across age groups.

### **B.3 Estimating Net Value**

To form the change in QALE associated with each condition, we start with the mortality and quality of life data for 1999. To this, we add the change in mortality and quality of life for the indicated condition based on the predictions for 1999 and 2012. Because mortality rates vary greatly by age, we estimate separately the mortality trend in three age groups: 65-74, 75-84, and 85+. We then reestimate QALE with these revised mortality and quality of life estimates. The change in QALE between the revised values and the actual value in 1999 is the impact of changes for that condition. We use a similar process for spending changes. Spending by age in each year is combined with life tables in that year (CDC, 2002-2016) to estimate expected spending over the remaining lifetime. Net value for each condition is the dollar value of the change in QALE less the increase in medical spending (all in real \$2010 dollars).

### **B.4 Behavioral Risk Factors**

To quantify the relationship between health conditions and smoking and obesity, we use regressions to predict both direct conditions and risk factors as a function of smoking and obesity status, controlling for sociodemographic variables and survey years. The sample is people aged 65–69 in the pooled MCBS data, 1999–2012. We focus on the younger age group to avoid differential mortality by risk status—for example, there are few smokers at older ages. To compare our estimates of these effects with those in the literature, we consulted reports from the US Surgeon General (CDC, 2014) for smoking and the International Association for the Study of Obesity (Lobstein and Leach, 2010) for weight. For some conditions not covered in these reports, we also searched the literature for estimates of the effects of these behavioral risk factors. The relative risks we employ and comparison to values in the literature are shown for selected conditions in **Table B9**. The majority of our estimates are smaller than those in the literature.

## B.5 Contribution of Prevalence Change to QALE Change by Disease

The extent to which change in the prevalence of each disease category contributed to overall QALE change per capita for each disease is shown in **Figure B7**. There was an overall QALE improvement for some diseases due to both a decline in prevalence and improved health/survival among those with the disease: ischemic heart disease, congestive heart failure, lung cancer, acute renal failure, and frailty. For some conditions, there was an increase in overall QALE despite an *increase* in prevalence, due to substantially improved health and survival among those with the conditions. These include other heart and vascular, strokes, other cancers, arthritis and musculoskeletal, other endocrine, and gastrointestinal/liver. Conversely, an increase in prevalence contributed to a reduction in QALE for some other conditions, outweighing the positive contribution of improved health and survival among those with the conditions: this was the case for cardiovascular risk factors (hypertension, hyperlipidemia, diabetes), mental health problems, diseases of the central nervous system, and after care. For some conditions, there was both a prevalence increase and a decline in health and survival among those with the disease, both contributing to an overall QALE decline: this effect was large for chronic renal failure/ESRD, and relatively small for infectious disease, other genitourinary, accidents/falls, and general symptoms and other disease.

We further examine the contribution to prevalence change of changes in behavioral risk factors: smoking and BMI. Changes in smoking and obesity by age group in MCBS are shown in **Table B10**. The contributions of these smoking and obesity changes to prevalence change for each disease are depicted in **Figure B8** (note that a smaller scale is used for smoking and obesity to enable viewing of the relative effects of these behavioral risk factors on the prevalence of different diseases). The decline in smoking explained a portion of the improvement in cardiovascular diseases, lung cancer, and respiratory conditions. The worsening of several conditions by smoking is partly attributable to a rise in former smokers among the oldest groups, which continued to affect their risk. Still, the effects are small relative to the overall change in prevalence of these conditions, due to a relatively small change in the proportion of older adults smoking over the time period. The increase in obesity was also not as large in the elderly population as in the non-elderly over this time period; however it did hold back QALE gains for a number of conditions, including cardiovascular disease as well as gastrointestinal/liver conditions, frailty, and musculoskeletal

conditions. The small positive effect of obesity on declining lung cancer prevalence reflects a protective effect of obesity that continues to be studied (Sanikini et al. 2018). Overall, including the portion of prevalence increase not explained by behavioral risk factors, prevalence increases were greatest for cardiovascular risk factors, mental health and nervous system conditions, infectious diseases, chronic renal failure, endocrine disorders, and after care.

## **B.6 Standard Errors for Estimates of Productivity**

**Table 5** in the paper gives our estimates—overall and for each disease category—of change in the present value of lifetime costs, change in QALE, and the net value of this spending using different amounts to represent the dollar value of a quality-adjusted life year. The 95% confidence intervals for these estimates, calculated using a bootstrap technique as described in the main paper, are given in Table 5 only for overall changes, for space reasons. **Table B11** shows the confidence intervals for all of the conditions. The bootstrap standard errors reflect all the uncertainties introduced by imputation and estimation.

**Figure B1: Outline of Productivity Analysis**

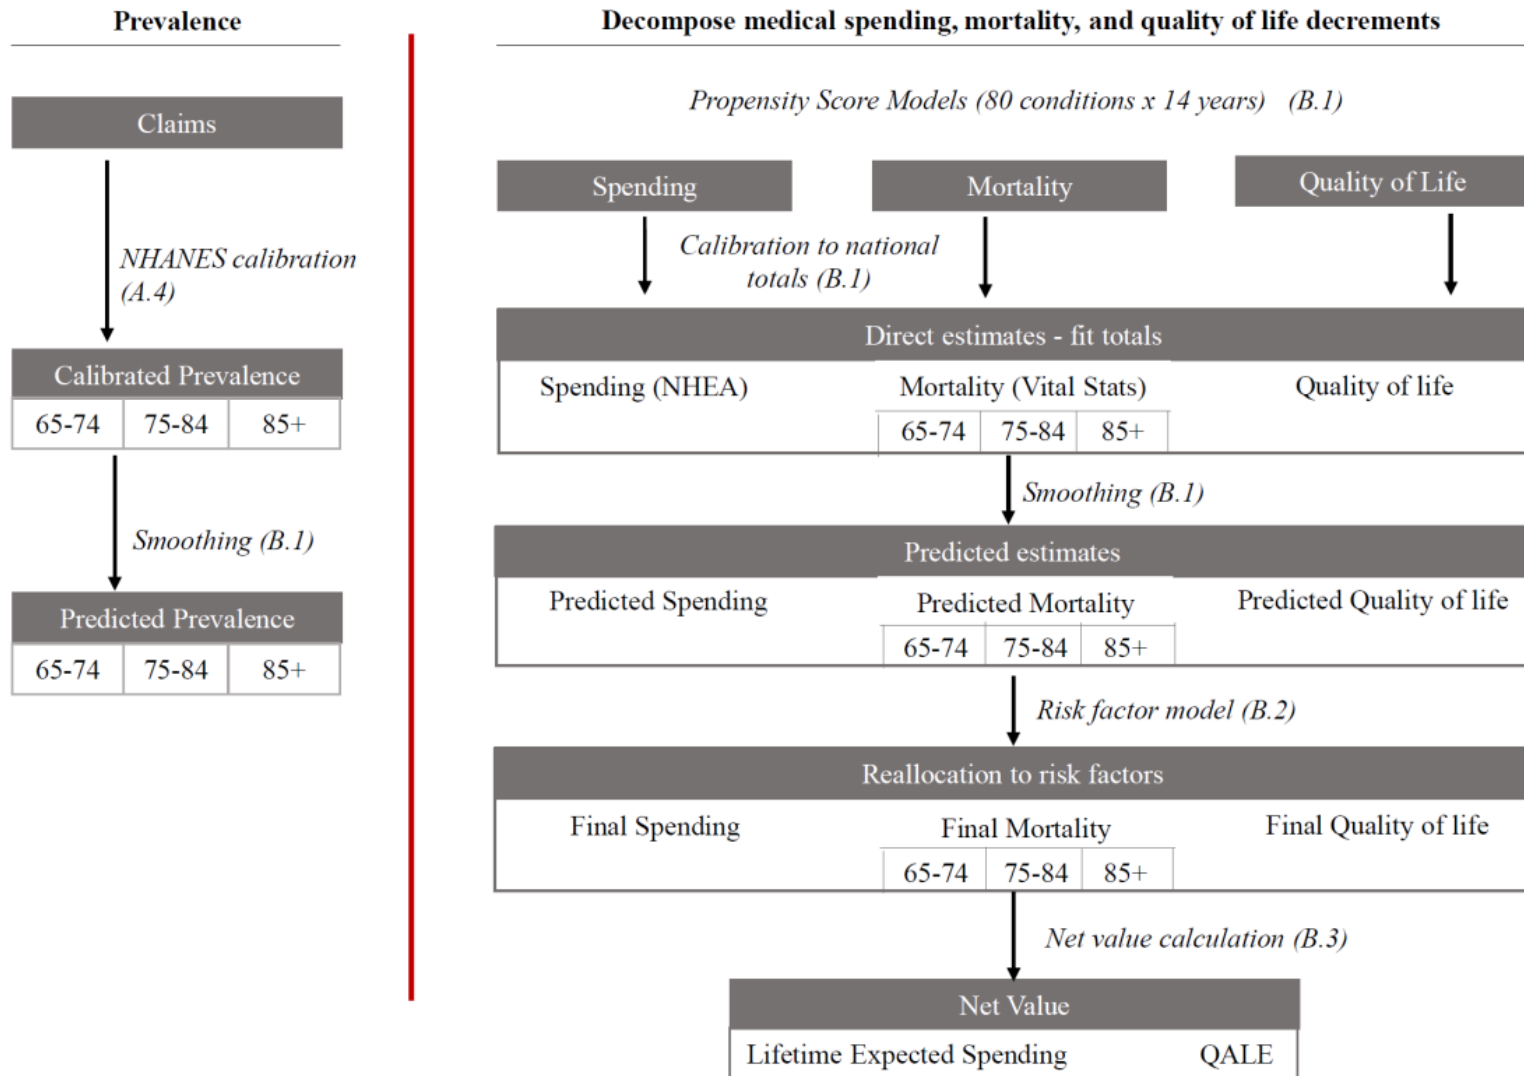

Note: Values in *italics* are the relevant sections of the Appendix.

**Figure B2: Conditions with Deviations from 5 Strata in the PSM Models**

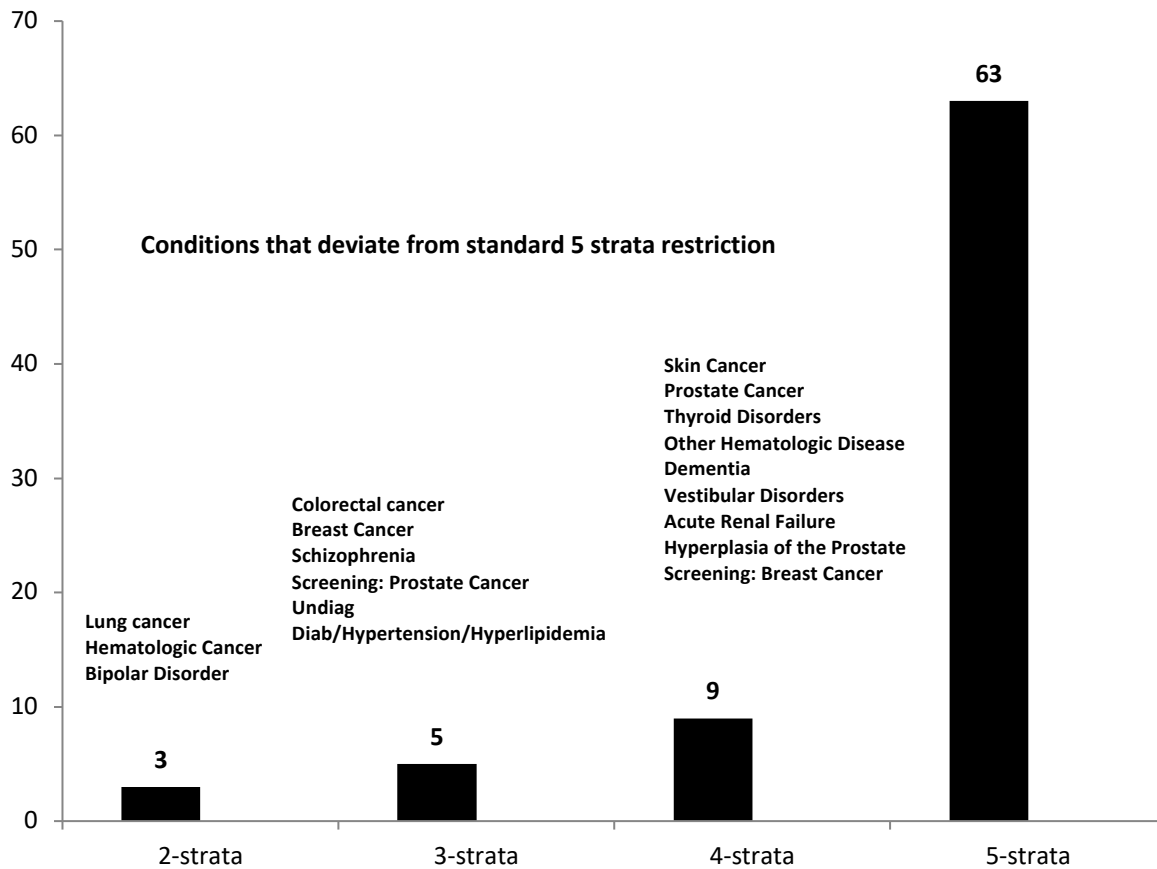

Note: PSM=Propensity Score Models used to estimate the impact of having the condition on medical spending, mortality, and quality of life decrement using within-strata differences.

**Figure B3: Distribution of Joint p-Values for the Joint F-test of Equality between Treatment and Controls for Covariates Included in the Matching for All 80 Conditions in All Years**

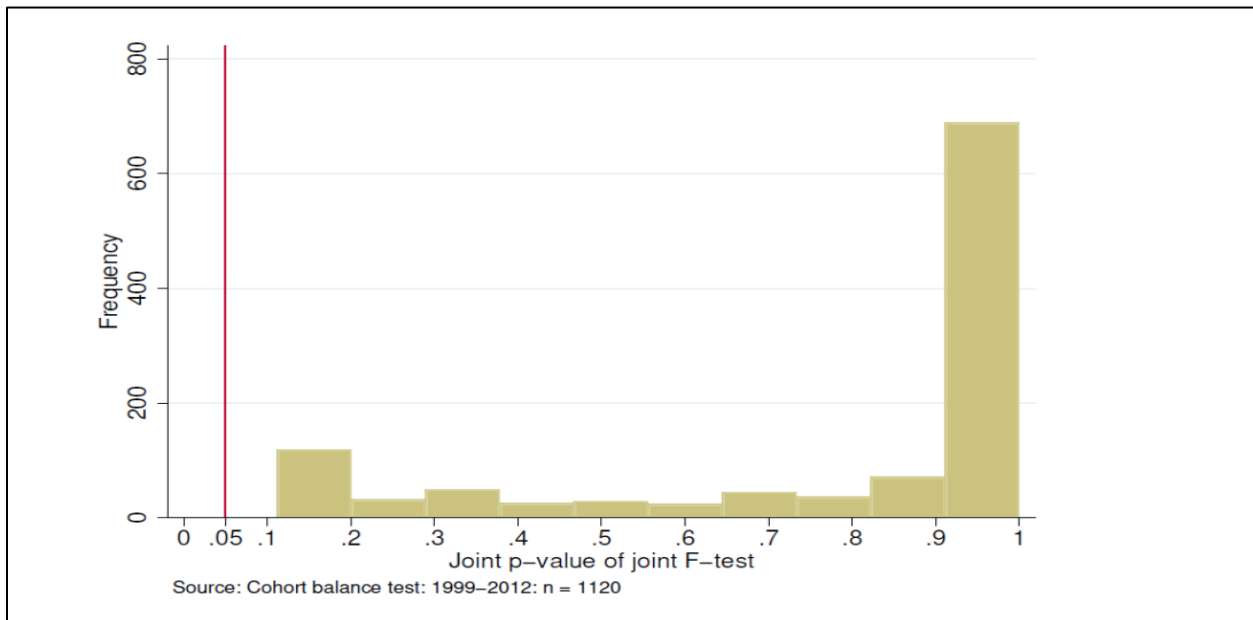

**Figure B4: Distribution of Joint p-Values for the Joint F-test of Equality between Treatment and Controls for Covariates Excluded in the Matching for All 80 Conditions in All Years**

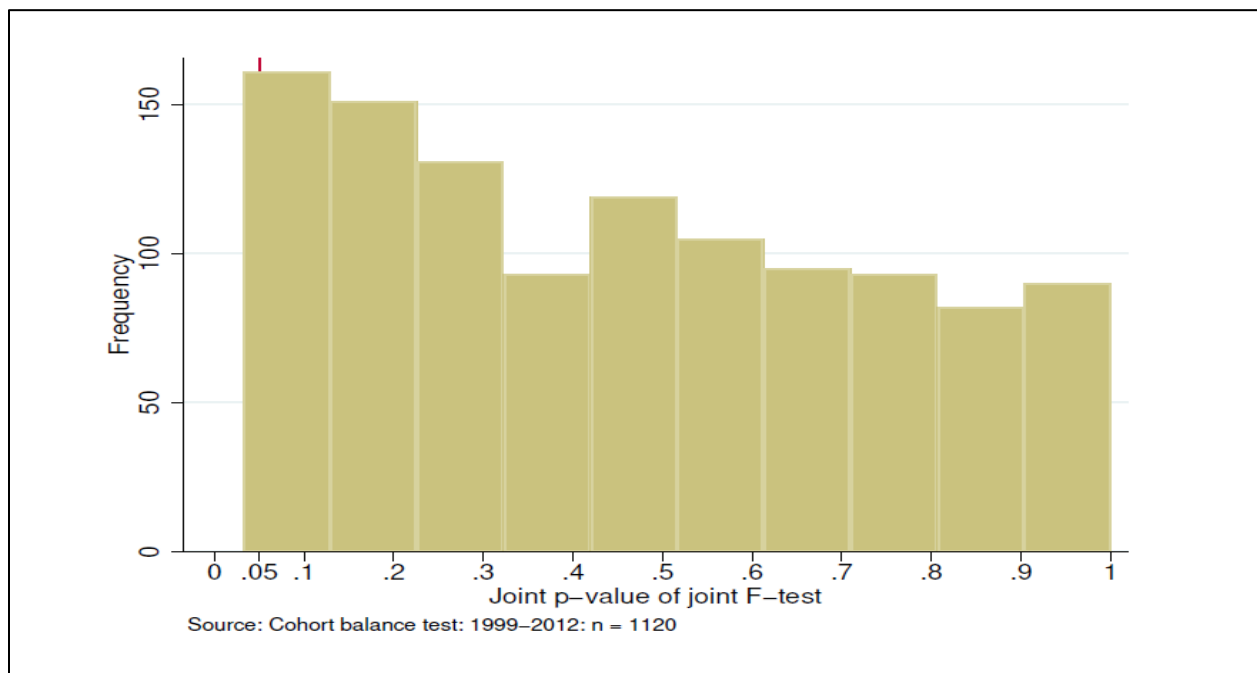

**Figure B5: Absolute Standardized Mean Difference in 1999 MCBS: Covariates Omitted from Propensity Score Matching**

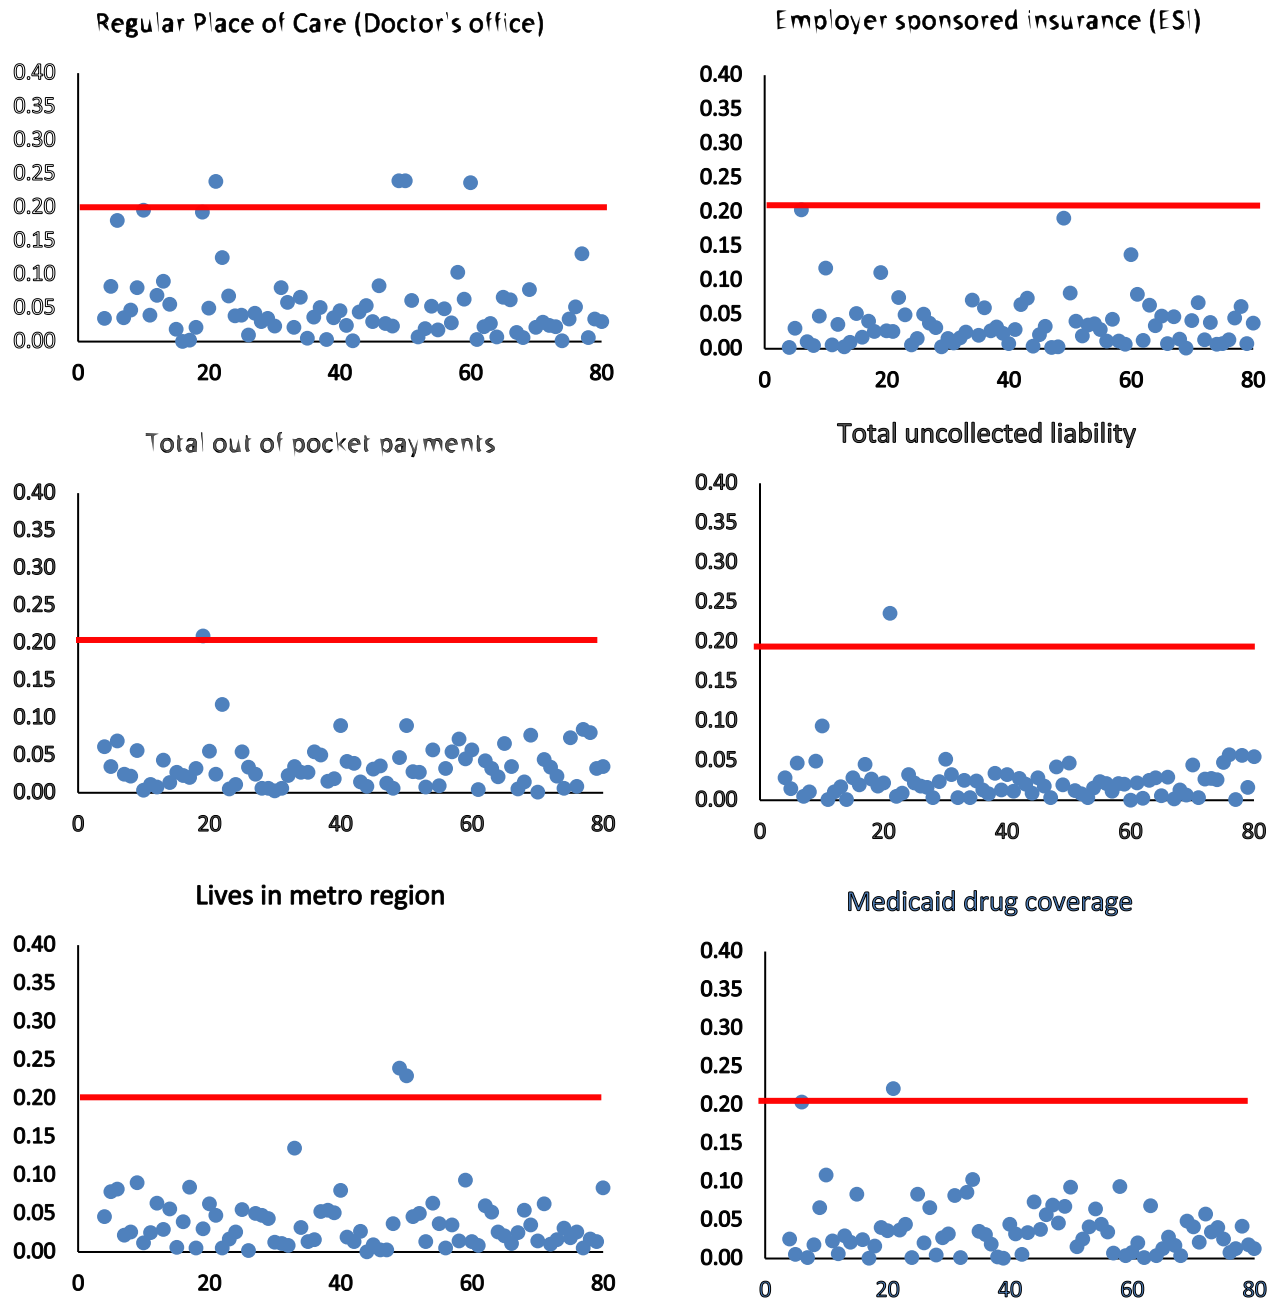

Note: The horizontal axis is each of the 80 conditions, presented in Table A6. An absolute standardized mean difference  $<0.1$  or  $<0.20$  reflects good balance between the treatment and control group.

**Figure B6: Comparison of Per Capita Spending, MCBS 2009**

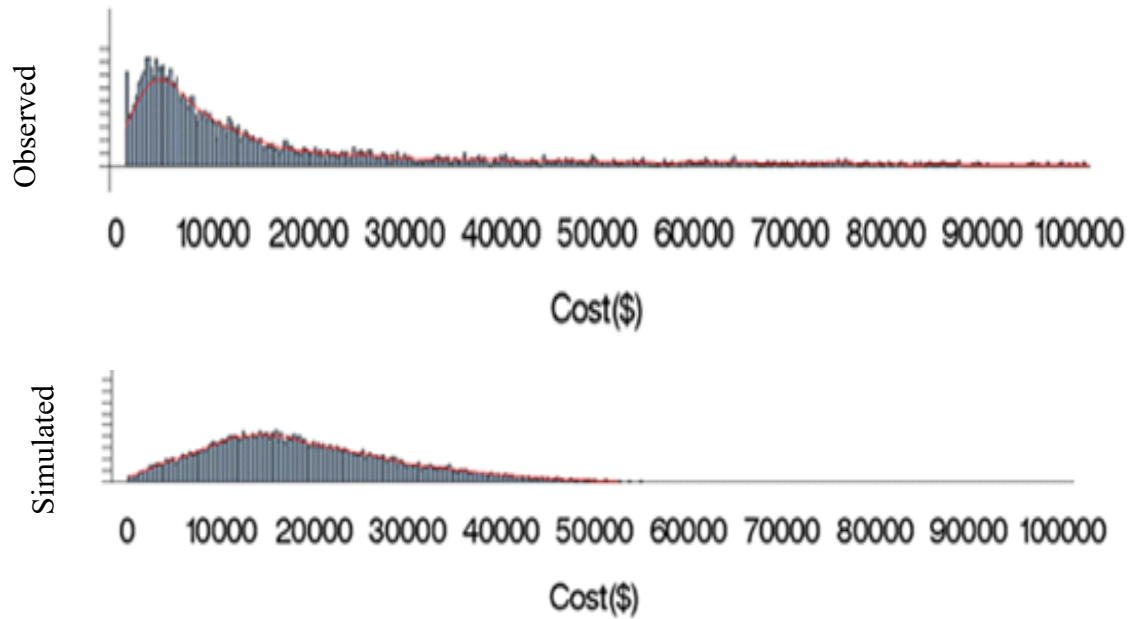

Note: The top chart is the distribution of spending across people. The bottom chart is the distribution of simulated spending estimated by adding condition-specific spending across the full set of conditions a person has. Spending is in real (\$2010) dollars.

**Figure B7: Contribution of Prevalence Change to Increase in Quality-Adjusted Life Expectancy by Disease Category, MCBS 1999-2012**

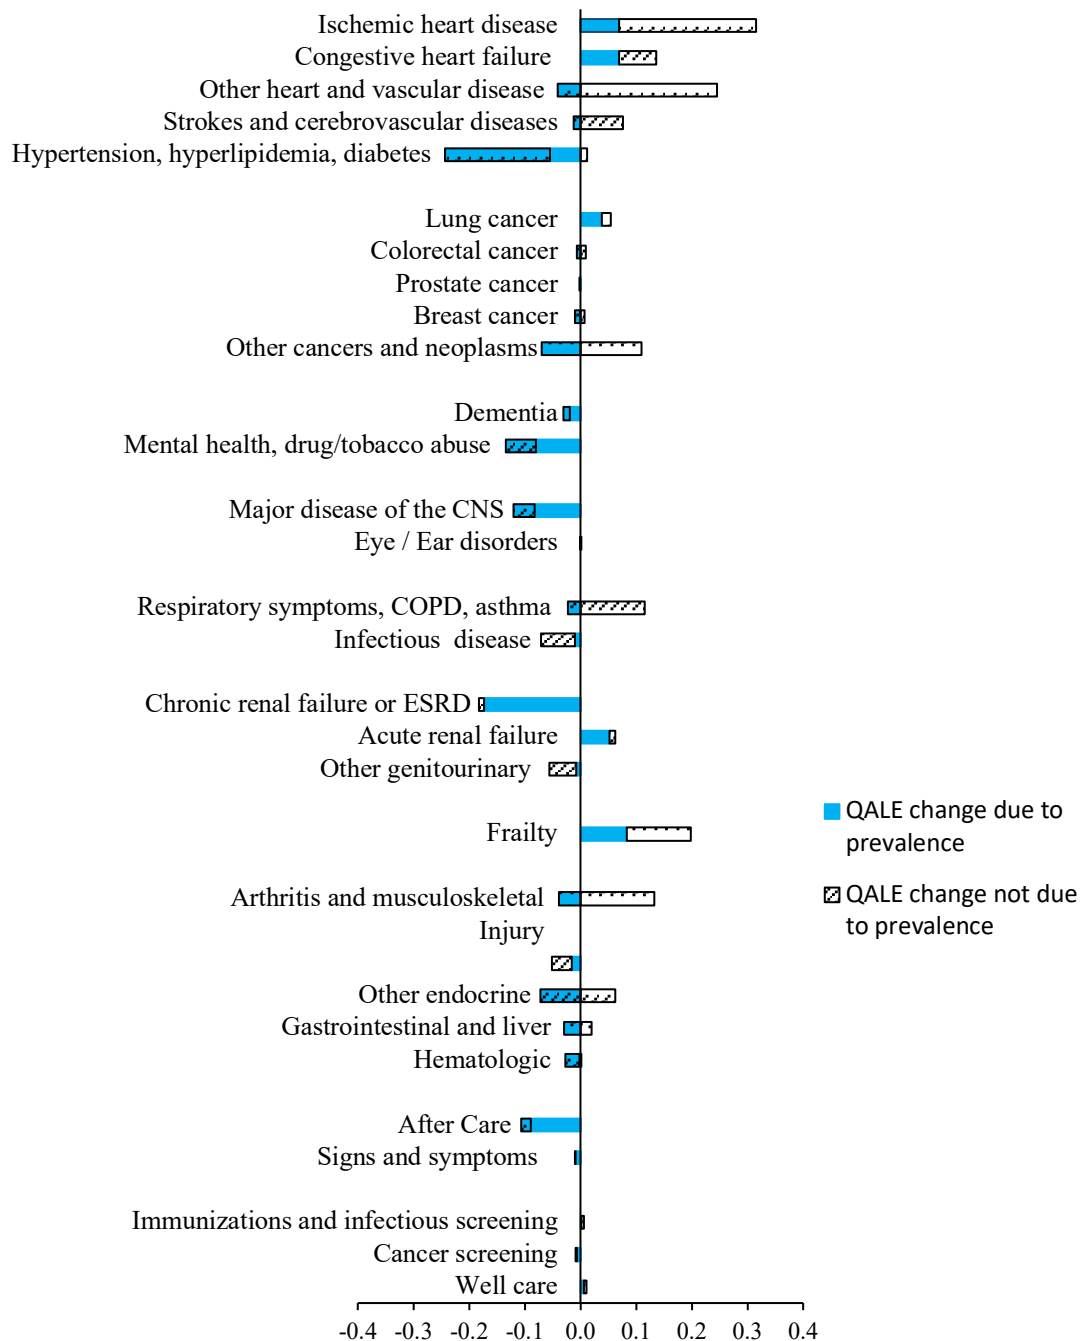

Note: This figure breaks down QALE change per capita. Table 5 in the paper shows the QALE change per person with each condition. The per capita change is roughly the change per person with the condition times the prevalence of the condition.

**Figure B8: Contribution of Smoking and Obesity Changes Affecting Disease Prevalence to the Change in Quality-Adjusted Life Expectancy by Disease Category, MCBS 1999–2012**

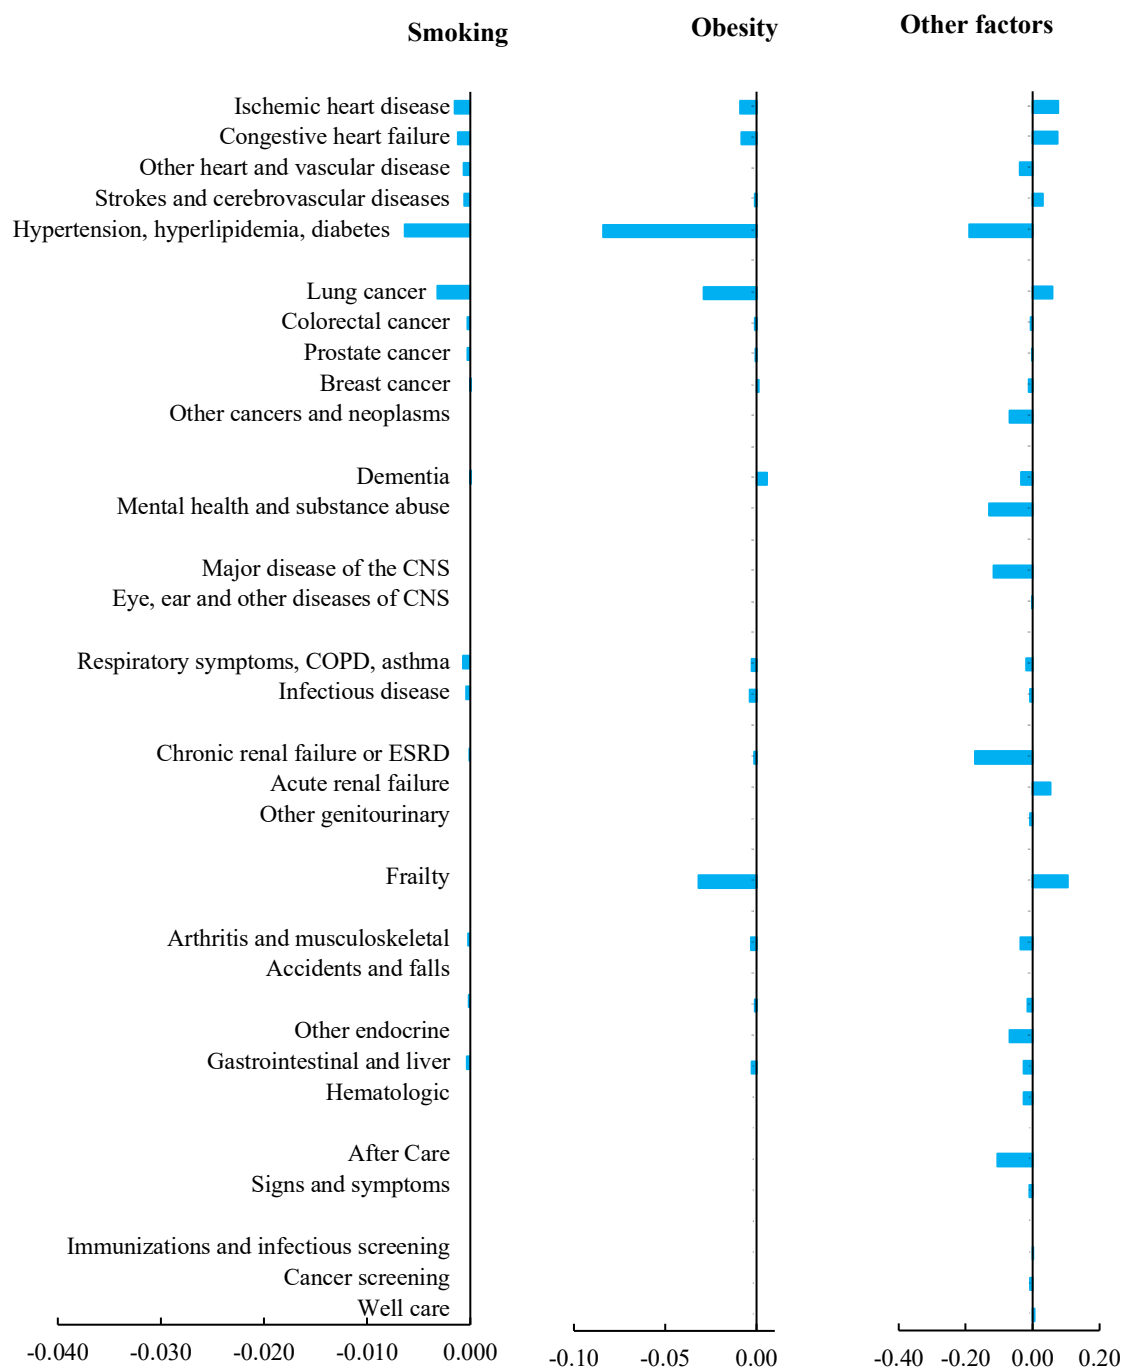

Note: Different scales are used to show the impact of smoking and obesity on the prevalence of each disease category, and to show the increases in prevalence not associated with these factors.

**Table B1: Exclusions from Propensity Score Models Used To Estimate the Impacts of Conditions on Medical Spending, Mortality, and Quality of Life**

| #Conditions                       | Conditions (#) /covariates                                                                                                                                           |
|-----------------------------------|----------------------------------------------------------------------------------------------------------------------------------------------------------------------|
| [3] Congestive Heart Failure      | Atrial fibrillation /Arrhythmia                                                                                                                                      |
| [4] Cardiac Arrest (includes VF)  | Atrial fibrillation /Arrhythmia                                                                                                                                      |
| [6] Other Cardiovascular Diseases | Coronary atherosclerosis and other heart disease                                                                                                                     |
| [13] Diabetes Mellitus            | Undiagnosed diabetes/hypertension/hyperlipidemia                                                                                                                     |
| [14] Hyperlipidemia               | Undiagnosed diabetes/hypertension/hyperlipidemia                                                                                                                     |
| [15] Hypertension                 | Undiagnosed diabetes/hypertension/hyperlipidemia                                                                                                                     |
| [17] Lung Cancer                  | Ever smoke, Smoke now                                                                                                                                                |
| [19] Prostate Cancer              | Breast cancer, Cervical cancer, Breast cancer screening, Cervical cancer screening, Reproductive (female), had hysterectomy, pap smear, mammogram                    |
| [20] Breast Cancer                | Male, PSA test in last year, Prostate Cancer, Hyperplasia of the Prostate, Screening: Prostate Cancer, Screening: Breast Cancer                                      |
| [30] Anxiety/PTSD                 | Drug/alcohol                                                                                                                                                         |
| [36] Cataract                     | Eye Disorders, Glaucoma                                                                                                                                              |
| [37] Glaucoma                     | Cataract, Eye disorders                                                                                                                                              |
| [38] Eye Disorders                | Cataract, Glaucoma                                                                                                                                                   |
| [42] Acute respiratory infection  | Respiratory symptoms, Other respiratory disease                                                                                                                      |
| [43] Respiratory symptoms         | Chronic obstructive pulmonary disease (COPD), Acute respiratory infection, Other respiratory diseases                                                                |
| [44] Other respiratory diseases   | Chronic obstructive pulmonary disease, Acute respiratory infection, Other respiratory                                                                                |
| [45] COPD                         | Asthma                                                                                                                                                               |
| [46] Asthma                       | COPD, Acute respiratory infection, Respiratory symptoms, Other respiratory diseases                                                                                  |
| [47] Pneumonia (non-TB, non-STD)  | Pneumonia vaccination, Influenza, Immunizations and screening for infectious disease, Infectious disease                                                             |
| [48] Influenza                    | Flu shot last year                                                                                                                                                   |
| [49] Infectious disease           | Flu shot last year, Pneumonia vaccination                                                                                                                            |
| [51] Acute Renal Failure          | Chronic Renal failure                                                                                                                                                |
| [52] Hyperplasia of the Prostate  | Male, had hysterectomy, pap smear, mammogram, Breast Cancer, Cervical Cancer, Screening: Breast Cancer, Screening: Cervical Cancer, Reproductive(female)             |
| [56] Hip Fracture                 | Difficulty walking, Difficulty stooping                                                                                                                              |
| [59] Osteoarthritis               | Other Rheumatism Diseases                                                                                                                                            |
| [64] Accidents and E-codes        | Signs and symptoms                                                                                                                                                   |
| [67] Reproductive (female)        | Male, Prostate cancer, Hyperplasia of the Prostate                                                                                                                   |
| [71] After Care                   | Signs and symptoms, Well Care, Accidents and E-codes                                                                                                                 |
| [74] Signs and symptoms           | Well Care, After Care, Accident E-codes, Trauma, Fractures, Poisoning and other injury, Motor vehicle accident                                                       |
| [76] Screening: Breast Cancer     | Male, PSA test in last year, Prostate Cancer, Hyperplasia of the Prostate, Screening: Prostate Cancer                                                                |
| [77] Screening: Colorectal Cancer | Colorectal Cancer                                                                                                                                                    |
| [78] Screening: Prostate Cancer   | Male, had hysterectomy, pap smear, mammogram, Prostate Cancer, Hyperplasia of the Prostate, Breast Cancer Screening, Cervical Cancer Screening, Reproductive(female) |
| [79] Screening: Cervical Cancer   | Male, pap smear, Other Cancer, PSA test in last year, Screening: Prostate Cancer, Prostate Cancer, Hyperplasia of the Prostate                                       |
| [80] Well Care                    | Signs and symptoms, After Care, Accidents and E-codes                                                                                                                |

**Table B2: Comparison of Actual Outcomes and Estimates from First Stage Models**

| Year | Per capita spending |                   |       | Mortality rate (per 100,000) |                   |       | QoL (0-1) |                   |       |
|------|---------------------|-------------------|-------|------------------------------|-------------------|-------|-----------|-------------------|-------|
|      | Actual              | First Stage total | Ratio | Actual                       | First Stage total | Ratio | Actual    | First Stage total | Ratio |
| 1999 | \$13,103            | \$26,166          | 2.0   | 5,479                        | 6,992             | 1.3   | 0.69      | 0.74              | 1.06  |
| 2000 | \$13,886            | \$29,434          | 2.1   | 5,428                        | 7,183             | 1.3   | 0.70      | 0.74              | 1.06  |
| 2001 | \$14,296            | \$31,528          | 2.2   | 5,355                        | 7,728             | 1.4   | 0.70      | 0.74              | 1.06  |
| 2002 | \$14,902            | \$30,245          | 2.0   | 5,346                        | 7,497             | 1.4   | 0.70      | 0.74              | 1.06  |
| 2003 | \$15,521            | \$33,738          | 2.2   | 5,253                        | 7,614             | 1.4   | 0.70      | 0.74              | 1.05  |
| 2004 | \$16,135            | \$40,554          | 2.5   | 5,051                        | 7,397             | 1.5   | 0.71      | 0.74              | 1.05  |
| 2005 | \$16,432            | \$35,197          | 2.1   | 5,060                        | 7,715             | 1.5   | 0.70      | 0.74              | 1.06  |
| 2006 | \$16,943            | \$36,924          | 2.2   | 4,885                        | 7,574             | 1.6   | 0.70      | 0.74              | 1.05  |
| 2007 | \$17,188            | \$39,388          | 2.3   | 4,781                        | 7,702             | 1.6   | 0.70      | 0.74              | 1.05  |
| 2008 | \$17,460            | \$42,916          | 2.5   | 4,801                        | 7,469             | 1.6   | 0.71      | 0.73              | 1.04  |
| 2009 | \$17,472            | \$44,037          | 2.5   | 4,606                        | 7,250             | 1.6   | 0.71      | 0.73              | 1.04  |
| 2010 | \$17,574            | \$47,953          | 2.7   | 4,629                        | 7,093             | 1.5   | 0.71      | 0.73              | 1.02  |
| 2011 | \$17,719            | \$46,142          | 2.6   | 4,579                        | 7,064             | 1.5   | 0.71      | 0.73              | 1.03  |
| 2012 | \$17,897            | \$47,902          | 2.7   | 4,515                        | 6,695             | 1.5   | 0.71      | 0.72              | 1.02  |

Note: The table shows the benchmarking that is used to adjust totals for spending and mortality to national estimates. (For quality of life, adjustments are not needed since the weighted value across conditions is within 5% of the total quality of life decrement in the population)

**Table B3: Summary Estimates of Mortality Rates for 80 Conditions from Propensity Score Models**

| Organ System /                           |                                               | Mortality Rate [%] |           |             |           |
|------------------------------------------|-----------------------------------------------|--------------------|-----------|-------------|-----------|
| Broad category (33)                      | Detailed Conditions (80)                      | 1999               |           | 2012        |           |
|                                          |                                               | Coefficient        | Std Error | Coefficient | Std Error |
| 1. Ischemic heart disease                | 1. Acute myocardial infarction                | 2.54%              | 0.30%     | 1.17%       | 0.27%     |
|                                          | 2. Coronary atherosclerosis & other heart     | 2.22%              | 0.29%     | 0.83%       | 0.20%     |
| 2. Congestive heart failure              | 3. Congestive heart failure                   | 2.24%              | 0.26%     | 1.86%       | 0.43%     |
| 3. Other heart and vascular disease      | 4. Cardiac arrest (includes VF)               | 20.09%             | 2.54%     | 15.09%      | 2.97%     |
|                                          | 5. Peripheral vascular disease                | 0.71%              | 0.25%     | 0.21%       | 0.22%     |
|                                          | 6. Other cardiovascular disease               | 0.99%              | 0.24%     | 0.67%       | 0.23%     |
|                                          | 7. Other vascular disease                     | 0.53%              | 0.20%     | 0.09%       | 0.19%     |
|                                          | 8. Pulmonary embolism                         | 0.8%               | 1.0%      | 0.29%       | 0.69%     |
|                                          | 9. Deep vein thrombosis                       | 1.22%              | 0.69%     | 0.60%       | 0.40%     |
|                                          | 10. Atrial fibrillation /Arrhythmia           | 0.95%              | 0.18%     | 0.48%       | 0.21%     |
| 4. Strokes and cerebrovascular disease   | 11. Cerebrovascular disease                   | 0.50%              | 0.29%     | 0.19%       | 0.29%     |
|                                          | 12. Stroke                                    | 2.40%              | 0.32%     | 1.42%       | 0.49%     |
| 5. Cardiovascular risk factors           | 13. Diabetes mellitus                         | 0.94%              | 0.28%     | 0.70%       | 0.28%     |
|                                          | 14. Hyperlipidemia                            | —                  | —         | —           | —         |
|                                          | 15. Hypertension                              | —                  | —         | —           | —         |
|                                          | 16. Undiagnosed diabetes, HTN, Hyperlipidemia | —                  | —         | —           | —         |
| 6. Lung cancer                           | 17. Lung cancer                               | 15.56%             | 3.92%     | 18.08%      | 3.69%     |
| 7. Colorectal cancer                     | 18. Colorectal cancer                         | 1.89%              | 1.69%     | 1.45%       | 1.01%     |
| 8. Prostate cancer                       | 19. Prostate cancer                           | 1.04%              | 0.47%     | 0.96%       | 0.90%     |
| 9. Breast cancer                         | 20. Breast cancer                             | 0.64%              | 0.59%     | 0.27%       | 0.39%     |
| 10. Other cancers and neoplasms          | 21. Skin cancer                               | -0.07%             | 0.55%     | -0.08%      | 0.74%     |
|                                          | 22. Hematologic cancer                        | 3.50%              | 3.51%     | -0.68%      | 1.63%     |
|                                          | 23. Benign neoplasm                           | -0.31%             | 0.33%     | -0.61%      | 0.27%     |
|                                          | 24. Other cancers                             | 2.52%              | 0.29%     | 2.09%       | 0.26%     |
| 11. Dementia                             | 25. Dementia                                  | 1.97%              | 0.34%     | 1.97%       | 0.33%     |
| 12. Mental health and drug/tobacco abuse | 26. Depression                                | 0.62%              | 0.36%     | 0.86%       | 0.29%     |
|                                          | 27. Bipolar disorder                          | -2.82%             | 1.69%     | -0.29%      | 0.83%     |
|                                          | 28. Schizophrenia                             | 2.93%              | 0.60%     | 2.83%       | 0.51%     |
|                                          | 29. Drug/alcohol                              | 2.07%              | 0.44%     | 1.90%       | 0.40%     |
|                                          | 30. Anxiety/PTSD                              | -0.36%             | 0.32%     | -0.37%      | 0.27%     |
|                                          | 31. Mental health                             | 0.94%              | 0.33%     | 1.99%       | 0.32%     |
|                                          | 32. Seizure disorders                         | 1.08%              | 0.42%     | 0.77%       | 0.39%     |
| 13. Major disease of the CNS             | 33. Other disease of the CNS                  | 1.95%              | 0.27%     | 2.12%       | 0.22%     |
|                                          | 34. Parkinson's disease, MS, Paralysis        | 0.94%              | 0.34%     | 0.63%       | 0.39%     |

|                                        |                                       |        |       |        |       |
|----------------------------------------|---------------------------------------|--------|-------|--------|-------|
| 14. Eye, ear and other diseases of CNS | 35. Otitis media                      | —      | —     | —      | —     |
|                                        | 36. Cataract                          | —      | —     | —      | —     |
|                                        | 37. Glaucoma                          | —      | —     | —      | —     |
|                                        | 38. Eye disorders                     | —      | —     | —      | —     |
|                                        | 39. Vestibular disorders              | —      | —     | —      | —     |
|                                        | 40. Other ear disorders               | —      | —     | —      | —     |
| 15. Respiratory symptoms, COPD, asthma | 41. Headache/migraine                 | —      | —     | —      | —     |
|                                        | 42. Acute respiratory infection       | -2.06% | 0.18% | -1.81% | 0.19% |
|                                        | 43. Respiratory symptoms              | 1.72%  | 0.19% | 1.29%  | 0.21% |
|                                        | 44. Other respiratory disease         | 2.48%  | 0.22% | 1.91%  | 0.22% |
|                                        | 45. COPD                              | 1.47%  | 0.31% | 0.76%  | 0.35% |
| 16. Infectious disease                 | 46. Asthma                            | 0.01%  | 0.26% | -0.16% | 0.28% |
|                                        | 47. Pneumonia (non-TB, non-STD)       | 2.59%  | 0.26% | 3.16%  | 0.42% |
|                                        | 48. Influenza                         | -1.04% | 0.45% | 1.40%  | 2.40% |
|                                        | 49. Infectious disease                | 0.19%  | 0.19% | 0.44%  | 0.21% |
| 17. Chronic renal failure/ESRD         | 50. Chronic renal Failure or ESRD     | 1.77%  | 0.50% | 1.86%  | 0.28% |
| 18. Acute renal failure                | 51. Acute Renal Failure               | 5.30%  | 0.57% | 5.16%  | 0.35% |
| 19. Other genitourinary disease        | 52. Hyperplasia of the Prostate       | -2.09% | 0.44% | -1.19% | 0.39% |
|                                        | 53. Genitourinary                     | 0.37%  | 0.16% | 0.18%  | 0.20% |
| 20. Frailty                            | 54. Functional limitations (moderate) | -0.42% | 0.31% | -0.07% | 0.94% |
|                                        | 55. Functional limitations (severe)   | 12.02% | 0.70% | 11.26% | 0.84% |
| 21. Musculoskeletal                    | 56. Hip fracture                      | 1.51%  | 0.67% | 0.65%  | 1.28% |
|                                        | 57. Gout and other arthropathies      | 0.01%  | 0.46% | 0.11%  | 0.33% |
|                                        | 58. Rheumatoid arthritis              | 0.30%  | 0.25% | 0.61%  | 0.93% |
|                                        | 59. Osteoarthritis                    | 0.31%  | 0.18% | 0.39%  | 0.17% |
|                                        | 60. Back Pain                         | 0.46%  | 0.20% | 0.45%  | 0.18% |
|                                        | 61. Osteoporosis                      | 0.20%  | 0.38% | 0.14%  | 0.41% |
| 22. Accidents and falls                | 62. Other rheumatic disease           | 0.50%  | 0.17% | 0.46%  | 0.28% |
|                                        | 63. General trauma                    | 0.25%  | 0.16% | 0.42%  | 0.23% |
|                                        | 64. Accidents and E-codes             | 0.18%  | 0.30% | 0.34%  | 0.35% |
| 23. Other endocrine                    | 65. Other endocrine disease           | 2.31%  | 0.19% | 1.32%  | 0.22% |
|                                        | 66. Thyroid disorders                 | -0.56% | 0.27% | -0.72% | 0.22% |
|                                        | 67. Reproductive(female)              | -1.39% | 0.34% | -0.80% | 0.48% |
| 24. Gastrointestinal and liver         | 68. Gastrointestinal and Liver        | 0.65%  | 0.16% | 0.59%  | 0.22% |
| 25. Hematologic                        | 69. Anemias                           | -0.16% | 0.19% | 0.09%  | 0.26% |
|                                        | 70. Other hematologic disease         | 0.99%  | 0.31% | 0.21%  | 0.30% |
| 26. After Care                         | 71. After Care                        | 0.56%  | 0.22% | 0.62%  | 0.19% |
| 27. General Symptoms and other disease | 72. Dermatologic disease              | -0.77% | 0.20% | -0.66% | 0.25% |
|                                        | 73. Birth defects                     | -0.31% | 0.30% | -0.22% | 0.35% |

|                                           |                                  |        |       |        |       |
|-------------------------------------------|----------------------------------|--------|-------|--------|-------|
|                                           | 74. Signs and symptoms           | 0.01%  | 0.25% | -0.03% | 1.72% |
| 28. Immunization and infectious screening | 75. Immunizations and screening  | —      | —     | —      | —     |
|                                           | 76. Screening: Breast cancer     | —      | —     | —      | —     |
| 29. Screening                             | 77. Screening: Colorectal cancer | —      | —     | —      | —     |
|                                           | 78. Screening: Prostate cancer   | —      | —     | —      | —     |
|                                           | 79. Screening: Cervical cancer   | —      | —     | —      | —     |
| 30. Well Care                             | 80. Well Care                    | -0.61% | 0.19% | -0.79% | 0.20% |

**Table B4: Summary Estimates of Quality-of-Life Decrements for 80 Conditions  
from Propensity Score Models**

| Organ System /<br>Broad category (33)    | Detailed Conditions (80)                      | QOL Decrement (from 1)* |           |             |           |
|------------------------------------------|-----------------------------------------------|-------------------------|-----------|-------------|-----------|
|                                          |                                               | 1999                    |           | 2012        |           |
|                                          |                                               | Coefficient             | Std Error | Coefficient | Std Error |
| 1. Ischemic heart disease                | 1. Acute myocardial infarction                | -0.004                  | 0.002     | -0.003      | 0.002     |
|                                          | 2. Coronary atherosclerosis & other heart     | -0.019                  | 0.002     | -0.010      | 0.004     |
| 2. Congestive heart failure              | 3. Congestive heart failure                   | -0.009                  | 0.002     | -0.009      | 0.004     |
| 3. Other heart and vascular disease      | 4. Cardiac arrest (includes VF)               | -0.024                  | 0.010     | -0.010      | 0.012     |
|                                          | 5. Peripheral vascular disease                | -0.006                  | 0.002     | -0.007      | 0.002     |
|                                          | 6. Other cardiovascular disease               | -0.011                  | 0.002     | -0.007      | 0.002     |
|                                          | 7. Other vascular disease                     | -0.007                  | 0.002     | -0.003      | 0.001     |
|                                          | 8. Pulmonary embolism                         | -0.014                  | 0.009     | -0.017      | 0.006     |
|                                          | 9. Deep vein thrombosis                       | -0.014                  | 0.005     | -0.006      | 0.004     |
|                                          | 10. Atrial fibrillation /Arrhythmia           | -0.006                  | 0.001     | -0.005      | 0.002     |
| 4. Strokes and cerebrovascular disease   | 11. Cerebrovascular disease                   | -0.009                  | 0.002     | -0.008      | 0.002     |
|                                          | 12. Stroke                                    | -0.018                  | 0.003     | -0.011      | 0.004     |
| 5. Cardiovascular risk factors           | 13. Diabetes mellitus                         | -0.010                  | 0.002     | -0.011      | 0.002     |
|                                          | 14. Hyperlipidemia                            | —                       | —         | —           | —         |
|                                          | 15. Hypertension                              | —                       | —         | —           | —         |
|                                          | 16. Undiagnosed diabetes, HTN, Hyperlipidemia | —                       | —         | —           | —         |
| 6. Lung cancer                           | 17. Lung cancer                               | -0.026                  | 0.018     | -0.003      | 0.019     |
| 7. Colorectal cancer                     | 18. Colorectal cancer                         | -0.008                  | 0.011     | -0.009      | 0.008     |
| 8. Prostate cancer                       | 19. Prostate cancer                           | 0.006                   | 0.004     | 0.000       | 0.006     |
| 9. Breast cancer                         | 20. Breast cancer                             | -0.002                  | 0.004     | -0.007      | 0.005     |
| 10. Other cancers and neoplasms          | 21. Skin cancer                               | -0.002                  | 0.005     | 0.005       | 0.005     |
|                                          | 22. Hematologic cancer                        | -0.062                  | 0.024     | -0.044      | 0.019     |
|                                          | 23. Benign neoplasm                           | 0.000                   | 0.002     | -0.001      | 0.002     |
|                                          | 24. Other cancers                             | -0.002                  | 0.002     | -0.003      | 0.002     |
| 11. Dementia                             | 25. Dementia                                  | -0.022                  | 0.003     | -0.027      | 0.004     |
| 12. Mental health and drug/tobacco abuse | 26. Depression                                | -0.013                  | 0.002     | -0.011      | 0.003     |
|                                          | 27. Bipolar disorder                          | -0.013                  | 0.021     | -0.017      | 0.007     |
|                                          | 28. Schizophrenia                             | -0.025                  | 0.004     | -0.027      | 0.005     |
|                                          | 29. Drug/alcohol                              | -0.008                  | 0.003     | -0.005      | 0.003     |
|                                          | 30. Anxiety/PTSD                              | -0.016                  | 0.002     | -0.007      | 0.002     |

|                                        |                                        |        |       |        |       |
|----------------------------------------|----------------------------------------|--------|-------|--------|-------|
|                                        | 31. Mental health                      | -0.009 | 0.003 | -0.009 | 0.003 |
| 13. Major disease of the CNS           | 32. Seizure disorders                  | -0.013 | 0.003 | -0.012 | 0.005 |
|                                        | 33. Other disease of the CNS           | -0.012 | 0.002 | -0.015 | 0.002 |
|                                        | 34. Parkinson's disease, MS, Paralysis | -0.018 | 0.002 | -0.007 | 0.003 |
|                                        |                                        |        |       |        |       |
| 14. Eye, ear and other diseases of CNS | 35. Otitis media                       | —      | —     | —      | —     |
|                                        | 36. Cataract                           | —      | —     | —      | —     |
|                                        | 37. Glaucoma                           | —      | —     | —      | —     |
|                                        | 38. Eye disorders                      | —      | —     | —      | —     |
|                                        | 39. Vestibular disorders               | —      | —     | —      | —     |
|                                        | 40. Other ear disorders                | —      | —     | —      | —     |
|                                        | 41. Headache/migraine                  | —      | —     | —      | —     |
| 15. Respiratory symptoms, COPD, asthma | 42. Acute respiratory infection        | -0.001 | 0.001 | 0.002  | 0.001 |
|                                        | 43. Respiratory symptoms               | -0.009 | 0.001 | -0.008 | 0.002 |
|                                        | 44. Other respiratory disease          | -0.009 | 0.001 | -0.011 | 0.002 |
|                                        | 45. COPD                               | -0.010 | 0.002 | -0.014 | 0.003 |
|                                        | 46. Asthma                             | -0.005 | 0.002 | -0.005 | 0.002 |
|                                        |                                        |        |       |        |       |
| 16. Infectious disease                 | 47. Pneumonia (non-TB, non-STD)        | -0.007 | 0.002 | -0.008 | 0.003 |
|                                        | 48. Influenza                          | 0.003  | 0.004 | -0.007 | 0.014 |
|                                        | 49. Infectious disease                 | -0.006 | 0.001 | -0.008 | 0.002 |
| 17. Chronic renal failure/ESRD         | 50. Chronic renal Failure or ESRD      | -0.016 | 0.006 | -0.015 | 0.002 |
| 18. Acute renal failure                | 51. Acute Renal Failure                | -0.009 | 0.004 | -0.008 | 0.003 |
| 19. Other genitourinary disease        | 52. Hyperplasia of the Prostate        | 0.002  | 0.003 | 0.000  | 0.003 |
|                                        | 53. Genitourinary                      | -0.006 | 0.001 | -0.009 | 0.001 |
| 20. Frailty                            | 54. Functional limitations (moderate)  | -0.026 | 0.004 | -0.021 | 0.004 |
|                                        | 55. Functional limitations (severe)    | -0.299 | 0.005 | -0.302 | 0.005 |
| 21. Musculoskeletal                    | 56. Hip fracture                       | -0.013 | 0.004 | -0.008 | 0.009 |
|                                        | 57. Gout and other arthropathies       | 0.001  | 0.003 | -0.004 | 0.004 |
|                                        | 58. Rheumatoid arthritis               | -0.002 | 0.002 | -0.008 | 0.007 |
|                                        | 59. Osteoarthritis                     | -0.002 | 0.001 | -0.004 | 0.001 |
|                                        | 60. Back Pain                          | -0.010 | 0.002 | -0.006 | 0.001 |
|                                        | 61. Osteoporosis                       | -0.006 | 0.002 | -0.004 | 0.003 |
|                                        | 62. Other rheumatic disease            | -0.004 | 0.001 | -0.007 | 0.002 |
|                                        |                                        |        |       |        |       |
| 22. Accidents and falls                | 63. General trauma                     | -0.006 | 0.001 | -0.007 | 0.002 |
|                                        | 64. Accidents and E-codes              | -0.010 | 0.002 | -0.013 | 0.003 |
| 23. Other endocrine                    | 65. Other endocrine disease            | -0.012 | 0.001 | -0.004 | 0.002 |
|                                        | 66. Thyroid disorders                  | -0.006 | 0.002 | -0.009 | 0.002 |
|                                        | 67. Reproductive(female)               | 0.006  | 0.003 | 0.006  | 0.005 |
| 24. Gastrointestinal and liver         | 68. Gastrointestinal and Liver         | -0.004 | 0.001 | -0.005 | 0.002 |

|                                              |                                  |        |              |        |              |
|----------------------------------------------|----------------------------------|--------|--------------|--------|--------------|
| 25. Hematologic                              | 69. Anemias                      | -0.010 | <i>0.002</i> | -0.008 | <i>0.002</i> |
|                                              | 70. Other hematologic disease    | -0.007 | <i>0.002</i> | -0.010 | <i>0.003</i> |
| 26. After Care                               | 71. After Care                   | -0.008 | <i>0.002</i> | -0.006 | <i>0.001</i> |
| 27. General Symptoms and<br>other disease    | 72. Dermatologic disease         | -0.003 | <i>0.001</i> | 0.001  | <i>0.002</i> |
|                                              | 73. Birth defects                | -0.001 | <i>0.002</i> | 0.002  | <i>0.003</i> |
|                                              | 74. Signs and symptoms           | -0.014 | <i>0.002</i> | -0.020 | <i>0.005</i> |
| 28. Immunization and<br>infectious screening | 75. Immunizations and screening  | —      | —            | —      | —            |
| 29. Screening                                | 76. Screening: Breast cancer     | —      | —            | —      | —            |
|                                              | 77. Screening: Colorectal cancer | —      | —            | —      | —            |
|                                              | 78. Screening: Prostate cancer   | —      | —            | —      | —            |
|                                              | 79. Screening: Cervical cancer   | —      | —            | —      | —            |
| 30. Well Care                                | 80. Well Care                    | -0.001 | <i>0.001</i> | 0.001  | <i>0.001</i> |

\*QOL scores calculated based on self-reported symptoms and impairments, as described in section A.3.

**Table B5: Model for Cost Adjustment, 2009**

| <b>Variable</b>                                                                                                                                                                     | <b>Coefficient</b> | <b>Std Error</b> |
|-------------------------------------------------------------------------------------------------------------------------------------------------------------------------------------|--------------------|------------------|
| Intercept                                                                                                                                                                           | 0.3956             | (0.0462)         |
| Number of comorbidities                                                                                                                                                             | -0.0042            | (0.0015)         |
| Number of comorbidities squared                                                                                                                                                     | 0.0001             | (0.0001)         |
| Any hospitalization                                                                                                                                                                 | -0.1663            | (0.0166)         |
| Number of nights in hospital                                                                                                                                                        | 0.0143             | (0.0004)         |
| Number of hospital admissions                                                                                                                                                       | 0.0246             | (0.0068)         |
| Number of days in an institution                                                                                                                                                    | 0.0021             | (0.0001)         |
| Patient survived the calendar year                                                                                                                                                  | 0.0828             | (0.0332)         |
| Number of months survived in the calendar year (if deceased)                                                                                                                        | 0.0071             | (0.0042)         |
| Number of outpatient claims                                                                                                                                                         | 0.0058             | (0.0007)         |
| N                                                                                                                                                                                   | 6,200              |                  |
| Adjusted R <sup>2</sup>                                                                                                                                                             | 0.68               |                  |
| Note: Data are from the Medicare Current Beneficiary Survey, 2009. The coefficients are the multiplier on simulated costs in a regression relating actual costs to simulated costs. |                    |                  |

**Table B6: Summary Estimates of Direct Spending for 80 Conditions  
from Propensity Score Models**

| Broad category (33)                         | Detailed Conditions (80)                               | Adjusted Cost per Case |           |         |           |
|---------------------------------------------|--------------------------------------------------------|------------------------|-----------|---------|-----------|
|                                             |                                                        | 1999                   |           | 2012    |           |
|                                             |                                                        | Mean                   | Std Error | Mean    | Std Error |
| <b>Cardiovascular disease</b>               |                                                        |                        |           |         |           |
| 1. Ischemic heart disease                   | 1. Acute myocardial infarction                         | \$762                  | \$104     | \$574   | \$172     |
|                                             | 2. Coronary atherosclerosis                            | \$1,358                | \$126     | \$1,763 | \$219     |
| 2. Congestive heart failure                 | 3. Congestive heart failure                            | \$1,306                | \$114     | \$2,177 | \$311     |
|                                             | 4. Cardiac arrest (includes VF)                        | \$1,084                | \$543     | \$811   | \$578     |
|                                             | 5. Peripheral vascular disease                         | \$1,214                | \$108     | \$1,195 | \$167     |
|                                             | 6. Other cardiovascular disease                        | \$1,586                | \$89      | \$1,086 | \$136     |
| 3. Other heart disease and vascular disease | 7. Other vascular disease                              | \$1,443                | \$86      | \$1,112 | \$94      |
|                                             | 8. Pulmonary embolism                                  | \$1,493                | \$570     | \$800   | \$290     |
|                                             | 9. Deep vein thrombosis                                | \$1,399                | \$343     | \$1,611 | \$271     |
|                                             | 10. Atrial fibrillation /Arrhythmia                    | \$1,023                | \$78      | \$947   | \$111     |
| 4. Strokes and cerebrovascular disease      | 11. Cerebrovascular disease                            | \$1,318                | \$146     | \$1,526 | \$285     |
|                                             | 12. Stroke                                             | \$1,238                | \$137     | \$1,172 | \$186     |
|                                             | 13. Diabetes mellitus                                  | \$873                  | \$105     | \$1,105 | \$102     |
| 5. Cardiovascular risk factors              | 14. Hyperlipidemia                                     | \$30                   | \$53      | \$254   | \$124     |
|                                             | 15. Hypertension                                       | \$513                  | \$77      | \$680   | \$181     |
|                                             | 16. Undiagnosed diabetes, hypertension, hyperlipidemia | \$39                   | \$200     | -\$756  | \$915     |
| <b>Cancer</b>                               |                                                        |                        |           |         |           |
| 6. Lung cancer                              | 17. Lung cancer                                        | \$2,927                | \$1,019   | \$5,441 | \$2,695   |
| 7. Colorectal cancer                        | 18. Colorectal cancer                                  | \$1,154                | \$428     | \$982   | \$381     |
| 8. Prostate cancer                          | 19. Prostate cancer                                    | \$349                  | \$199     | \$837   | \$329     |
| 9. Breast cancer                            | 20. Breast cancer                                      | \$280                  | \$203     | \$351   | \$204     |
|                                             | 21. Skin cancer                                        | \$1,072                | \$307     | \$982   | \$312     |
|                                             | 22. Hematologic cancer                                 | \$4,023                | \$1,323   | \$3,983 | \$1,153   |
| 10. Other cancers and neoplasms             | 23. Benign neoplasm                                    | \$626                  | \$100     | \$89    | \$108     |
|                                             | 24. Other cancers                                      | \$947                  | \$100     | \$853   | \$132     |
| <b>Mental health</b>                        |                                                        |                        |           |         |           |
| 11. Dementia                                | 25. Dementia                                           | \$2,243                | \$173     | \$2,559 | \$218     |
|                                             | 26. Depression                                         | \$875                  | \$124     | \$1,336 | \$176     |
|                                             | 27. Bipolar disorder                                   | \$3,165                | \$1,596   | \$1,621 | \$470     |
| 12. Mental health and drug/tobacco abuse    | 28. Schizophrenia                                      | \$2,698                | \$278     | \$3,787 | \$414     |
|                                             | 29. Drug/alcohol                                       | \$1,554                | \$160     | \$845   | \$139     |
|                                             | 30. Anxiety/PTSD                                       | \$596                  | \$156     | \$722   | \$134     |
|                                             | 31. Mental health                                      | \$1,490                | \$169     | \$1,841 | \$233     |

|                                               |                                          |          |              |          |              |
|-----------------------------------------------|------------------------------------------|----------|--------------|----------|--------------|
| <b>Diseases of the Central Nervous System</b> |                                          |          |              |          |              |
| 13. Major disease of the CNS                  | 32. Seizure disorders                    | \$562    | <i>\$163</i> | \$834    | <i>\$218</i> |
|                                               | 33. Other disease of the CNS             | \$1,463  | <i>\$98</i>  | \$1,557  | <i>\$146</i> |
|                                               | 34. Parkinson's disease, MS, Paralysis   | \$1,317  | <i>\$150</i> | \$880    | <i>\$187</i> |
| 14. Eye, ear and other diseases of CNS        | 35. Otitis media                         | -\$183   | <i>\$177</i> | \$52     | <i>\$221</i> |
|                                               | 36. Cataract                             | \$547    | <i>\$88</i>  | \$462    | <i>\$86</i>  |
|                                               | 37. Glaucoma                             | \$399    | <i>\$100</i> | \$489    | <i>\$117</i> |
|                                               | 38. Eye disorders                        | \$494    | <i>\$62</i>  | \$428    | <i>\$77</i>  |
|                                               | 39. Vestibular disorders                 | \$119    | <i>\$99</i>  | \$229    | <i>\$141</i> |
|                                               | 40. Other ear disorders                  | \$288    | <i>\$114</i> | \$384    | <i>\$150</i> |
|                                               | 41. Headache/migraine                    | \$149    | <i>\$100</i> | \$190    | <i>\$130</i> |
| <b>Respiratory Disease</b>                    |                                          |          |              |          |              |
| 15. Respiratory symptoms, COPD, asthma        | 42. Acute respiratory infection          | \$402    | <i>\$72</i>  | \$309    | <i>\$90</i>  |
|                                               | 43. Respiratory symptoms                 | \$1,687  | <i>\$79</i>  | \$1,421  | <i>\$101</i> |
|                                               | 44. Other respiratory disease            | \$2,061  | <i>\$99</i>  | \$1,942  | <i>\$105</i> |
|                                               | 45. COPD                                 | \$1,341  | <i>\$115</i> | \$1,818  | <i>\$262</i> |
|                                               | 46. Asthma                               | \$121    | <i>\$95</i>  | \$483    | <i>\$136</i> |
| 16. Pneumonia and other Infectious disease    | 47. Pneumonia (non-TB, non-STD)          | \$1,725  | <i>\$151</i> | \$2,309  | <i>\$314</i> |
|                                               | 48. Influenza                            | -\$149   | <i>\$212</i> | -\$134   | <i>\$908</i> |
|                                               | 49. Infectious disease                   | \$1,368  | <i>\$86</i>  | \$1,240  | <i>\$112</i> |
| <b>Kidney disease</b>                         |                                          |          |              |          |              |
| 17. Chronic renal failure or ESRD             | 50. Chronic renal Failure                | \$2,075  | <i>\$349</i> | \$1,380  | <i>\$136</i> |
| 18. Acute renal failure                       | 51. Acute Renal Failure                  | \$2,942  | <i>\$280</i> | \$3,269  | <i>\$243</i> |
| 19. Other genitourinary disease               | 52. Hyperplasia of the Prostate          | -\$217   | <i>\$127</i> | \$29     | <i>\$141</i> |
|                                               | 53. Genitourinary                        | \$692    | <i>\$74</i>  | \$1,020  | <i>\$84</i>  |
| 20. Frailty                                   | 54. Functional limitations (moderate)    | -\$133   | <i>\$187</i> | \$29     | <i>\$278</i> |
|                                               | 55. Functional limitations (severe)      | \$11,755 | <i>\$552</i> | \$14,610 | <i>\$613</i> |
| 21. Musculoskeletal                           | 56. Hip fracture                         | \$1,072  | <i>\$289</i> | \$1,104  | <i>\$581</i> |
|                                               | 57. Gout and other crystal arthropathies | \$108    | <i>\$154</i> | \$563    | <i>\$181</i> |
|                                               | 58. Rheumatoid arthritis                 | \$377    | <i>\$103</i> | \$1,404  | <i>\$448</i> |
|                                               | 59. Osteoarthritis                       | \$182    | <i>\$58</i>  | \$255    | <i>\$88</i>  |
|                                               | 60. Back Pain                            | \$396    | <i>\$77</i>  | \$443    | <i>\$85</i>  |
|                                               | 61. Osteoporosis                         | \$207    | <i>\$133</i> | \$302    | <i>\$173</i> |
|                                               | 62. Other rheumatic disease              | \$826    | <i>\$63</i>  | \$1,396  | <i>\$123</i> |
| 22. Accidents and falls                       | 63. General trauma                       | \$1,575  | <i>\$65</i>  | \$1,442  | <i>\$116</i> |
|                                               | 64. Accidents and E-codes                | \$1,157  | <i>\$121</i> | \$1,423  | <i>\$153</i> |

**Endocrine, GI, Liver,  
Hematologic**

|                                            |                                   |         |         |         |       |
|--------------------------------------------|-----------------------------------|---------|---------|---------|-------|
|                                            | 65. Other endocrine disease       | \$1,572 | \$76    | \$1,460 | \$91  |
|                                            | 66. Thyroid disorders             | \$348   | \$88    | \$652   | \$132 |
| 23. Other endocrine                        | 67. Reproductive(female)          | \$23    | \$130   | -\$354  | \$194 |
| 24. Gastrointestinal and<br>liver disease  | 68. Gastrointestinal and Liver    | \$958   | \$65    | \$1,102 | \$106 |
|                                            | 69. Anemias                       | \$1,451 | \$79    | \$1,740 | \$105 |
| 25. Hematologic                            | 70. Other hematologic disease     | \$1,696 | \$137   | \$2,297 | \$198 |
| <b>Other acute and chronic</b>             |                                   |         |         |         |       |
| 26. After Care                             | 71. After Care                    | \$1,091 | \$78    | \$1,811 | \$131 |
|                                            | 72. Dermatologic disease          | \$410   | \$64    | \$286   | \$122 |
| 27. General Symptoms and<br>others disease | 73. Birth defects                 | \$811   | \$152   | \$1,055 | \$187 |
|                                            | 74. Signs and symptoms            | \$1,507 | \$73    | \$1,739 | \$244 |
| <b>Immunization and<br/>Screening</b>      |                                   |         |         |         |       |
| 28. Immunization and<br>infectious         | 75. Immunizations and screen (ID) | \$305   | \$89    | \$309   | \$99  |
|                                            | 76. Screening: Breast cancer      | -\$291  | \$108   | -\$543  | \$131 |
|                                            | 77. Screening: Colorectal cancer  | -\$19   | \$169   | \$28    | \$173 |
|                                            | 78. Screening: Prostate cancer    | \$63    | \$1,009 | \$355   | \$255 |
| 29. Screening                              | 79. Screening: Cervical cancer    | -\$7    | \$163   | -\$90   | \$305 |
| 30. Well Care                              | Well Care A                       | \$649   | \$64    | \$388   | \$92  |

**Table B7: Impact of Risk Factor Conditions on Prevalence of Direct Conditions**

| Risk Factor                                              | Direct Condition                  | Relative Risk          |                                           |
|----------------------------------------------------------|-----------------------------------|------------------------|-------------------------------------------|
|                                                          |                                   | Estimated <sup>1</sup> | Clinical Studies                          |
| Hypertension                                             | Ischemic Heart Disease            | 1.21                   | 1.02–1.2 <sup>2</sup>                     |
|                                                          | Congestive Heart Failure          | 1.15                   | 1.1–1.7 <sup>3</sup>                      |
|                                                          | Other Heart / Peripheral Vascular | 1.09                   | 1.5 <sup>4</sup>                          |
|                                                          | Strokes / Cerebrovascular         | 1.18                   | 2.64–1.37 <sup>5</sup>                    |
|                                                          | Chronic Renal Failure             | 1.42                   | 1.05–2.44 <sup>6</sup>                    |
|                                                          | Acute Kidney Injury               | 1.51                   | 1.3–2.0 <sup>7</sup>                      |
| Hyperlipidemia                                           | Ischemic Heart Disease            | 1.32                   | 1.45 <sup>8</sup>                         |
|                                                          | Congestive Heart Failure          | 1.08                   | 1.10–1.49 <sup>9</sup>                    |
|                                                          | Other Heart / Peripheral Vascular | 1.06                   | 1.3 <sup>10</sup>                         |
|                                                          | Strokes / Cerebrovascular         | 1.12                   | 1.06–1.26 <sup>11</sup>                   |
| Diabetes                                                 | Ischemic Heart Disease            | 1.25                   | 1.33–2.78 <sup>12</sup>                   |
|                                                          | Congestive Heart Failure          | 1.30                   | 1.47–2.06 <sup>13</sup>                   |
|                                                          | Other Heart / Peripheral Vascular | 1.05                   | 0.58–10.20 <sup>14</sup>                  |
|                                                          | Strokes / Cerebrovascular         | 1.18                   | 0.46–1.60 <sup>15</sup>                   |
|                                                          | Chronic Renal Failure             | 1.74                   | 1.2–3.09 <sup>16</sup>                    |
|                                                          | Acute Kidney Injury               | 1.91                   | 1.34 <sup>17</sup>                        |
|                                                          | Dementia                          | 1.27                   | 1.09–4.2 <sup>18</sup>                    |
| Mood disorder<br>(depression, bipolar,<br>anxiety, PTSD) | Ischemic Heart Disease            | 0.98                   | 1.09–1.72 <sup>19</sup>                   |
|                                                          | Congestive Heart Failure          | 1.00                   | 1.10–1.47 <sup>20</sup>                   |
|                                                          | Other Heart and vascular disease  | 1.01                   | 1.33–2.09 <sup>21</sup>                   |
|                                                          | Strokes / Cerebrovascular         | 1.02                   | 1.24–4.21 <sup>22</sup>                   |
|                                                          | Dementia                          | 1.30                   | 1.10–2.29 <sup>23</sup>                   |
| Eye disorders                                            | Accidents and Falls               | 1.03                   | 1.09–2.04 <sup>24</sup>                   |
| Ear disorders                                            | Accidents and Falls               | 1.07                   | 3.5–4.14 <sup>25</sup>                    |
| Gout and other crystal at.                               | Frailty                           | 1.03                   | —                                         |
| Rheumatoid Arthritis                                     | Frailty                           | 1.12                   | —                                         |
| Osteoarthritis                                           | Frailty                           | 1.16                   | —                                         |
| Back Pain                                                | Frailty                           | 1.20                   | —                                         |
| Osteoporosis                                             | Frailty                           | 1.06                   | —                                         |
| Other Rheumatism                                         | Frailty                           | 1.27                   | —                                         |
| Hip Fractures                                            | Frailty                           | 1.71                   | 3.6 <sup>26</sup>                         |
| Immunization                                             | Infectious disease                | —                      | 0.93 <sup>27</sup>                        |
| Screening: Breast                                        | Breast cancer                     | —                      | 0.80 <sup>28</sup>                        |
| Screening: Colorectal                                    | Colorectal cancer                 | —                      | 0.83 <sup>29</sup>                        |
| Screening: Prostate                                      | Prostate cancer                   |                        | No clear effect <sup>30</sup>             |
| Screening: Cervical                                      | Cervical cancer                   |                        | Not recommended for elderly <sup>31</sup> |

<sup>1</sup>Calculated using coefficients from regressions of direct conditions on risk factor conditions using pooled MCBS data, 1999–2011. For immunization and screening, coefficients are not calculated and literature values are used). <sup>2</sup>Ettehad et al. 2016; Brunström & Carlberg 2018, <sup>3</sup>Ettehad et al. 2016; Brunström & Carlberg 2018; Sciarretta et al. 201, <sup>4</sup>Eraso et al. 2015, <sup>5</sup>Ettehad et al. 2016; Odonnell et al. 2010, <sup>6</sup>Young et al. 2002; Jafar et al. 2003, <sup>7</sup>James et al 2015, <sup>8</sup>Chou et al. 2016, <sup>9</sup>Velagaleti et al. 2009; Sakatani et al. 2005, <sup>10</sup>Bozkurt et al. 2016, <sup>11</sup>O'Regan et al. 2008; Wang et al. 2106, <sup>12</sup>Huxley et al., 2005; Shah et al. 2015, <sup>13</sup>Aune et al. 2018; Shah et al. 2015, <sup>14</sup>Eraso et al. 2015; Shah et al. 2015, <sup>15</sup>Odonnell et al. 2010; Shah et al. 2015, <sup>16</sup>Shen et al. 2017; Fox et al. 2012, <sup>17</sup>Jiayang 2017, <sup>18</sup>Cheng et al. 2012; Biessels et al. 2006; Profeno et al. 2010, <sup>19</sup>Ferketich et al. 2000; Carod-Artal 2007; Gan et al. 2014; De Hert et al. 2018, <sup>20</sup>Williams et al. 2002, Sherwood et al. 2007, Garfield et al. 2014, Roy et al. 2015, Edmin et al. 2016, Ogilvie et al. 2016; Correll et al. 2017, <sup>21</sup>Grenon et al 2012, <sup>22</sup>Carod-Artal 2007; Emdin 2016, <sup>23</sup>da Silva et al. 2013; <sup>24</sup>Owsley 2002; Owsley et al. 1998 (cataract/glaucoma motor vehicle crash); <sup>25</sup>Wei & Agrawal 2018; Lastrucci et al. 2017 (vertigo motor vehicle accidents / tinnitus falls), <sup>26</sup>Greendale et al 1995, <sup>27</sup>Tin Tin Htar 2017, Advisory Committee on Immunization Practices 2017; Osterholm et al. 2012; Rondy et al. 2017, <sup>28</sup>Nelson et al. 2016, <sup>29</sup>Lin et al. 2016, <sup>30</sup>Fenton et al 2018; <sup>31</sup>US Preventive Services Task Force, 2018.

**Table B8: Adjustments for the Effects of Risk Factors and Screening on Other Conditions**

| 1999                        |          |                   |          | 2012                        |          |                   |          |
|-----------------------------|----------|-------------------|----------|-----------------------------|----------|-------------------|----------|
| Risk factors                | Per Case | Final Condition   | Per Case | Risk factor                 | Per Case | Final condition   | Per Case |
| Cardiovascular risk factors | \$148    | IHD               | \$1,152  | Cardiovascular risk factors | \$249    | IHD               | \$1,253  |
|                             | \$36     | CHF               | \$1,212  |                             | \$45     | CHF               | \$2,004  |
|                             | \$123    | Other Heart, PVD  | \$2,141  |                             | \$111    | Other Heart, PVD  | \$1,981  |
|                             | \$52     | Strokes, CVD      | \$1,379  |                             | \$54     | Strokes, CVD      | \$1,578  |
| Hypertension, Diabetes      | \$59     | Chronic Renal     | \$1,483  | Hypertension, Diabetes      | \$143    | Chronic Renal     | \$1,342  |
| Diabetes, Mood              | \$70     | Acute Renal       | \$2,523  | Diabetes, Mood              | \$2      | Acute Renal       | \$3,258  |
| Eye, Ear                    | \$18     | Dementia          | \$2,114  | Diabetes, Mood              | \$21     | Dementia          | \$2,469  |
| Immunization                | \$14     | Accidents, Trauma | \$1,729  | Eye, Ear                    | \$11     | Accidents, Trauma | \$1,819  |
| Colorectal Cancer Screening | -\$24    | Infectious        | \$1,550  | Immunization                | -\$38    | infectious        | \$1,643  |
| Breast Cancer Screening     | -\$12    | Colorectal Cancer | \$1,234  | Colorectal Cancer Screening | -\$6     | Colorectal Cancer | \$1,048  |
| Musculoskeletal             | -\$4     | Breast Cancer     | \$290    | Breast Cancer Screening     | -\$6     | Breast Cancer     | \$359    |
|                             | \$236    | Frailty           | \$1,808  | Musculoskeletal             | \$314    | Frailty           | \$1,935  |

  

| Risk factor                 | Deaths | Final Condition   | Deaths | Risk factor                 | Deaths | Final condition   | Deaths |
|-----------------------------|--------|-------------------|--------|-----------------------------|--------|-------------------|--------|
| Cardiovascular risk factors | 175    | IHD               | 354    | Cardiovascular risk factors | 89     | IHD               | 100    |
|                             | 54     | CHF               | 315    |                             | 26     | CHF               | 171    |
|                             | 50     | Other Heart, PVD  | 505    |                             | 29     | Other Heart, PVD  | 273    |
|                             | 32     | Strokes, CVD      | 149    |                             | 21     | Strokes, CVD      | 67     |
| Hypertension, Diabetes      | 37     | Chronic Renal     | 39     | Hypertension, Diabetes      | 24     | Chronic Renal     | 161    |
| Diabetes, Mood              | 147    | Acute Renal       | 81     | Diabetes, Mood              | 235    | Acute Renal       | 55     |
| Eye, Ear                    | 12     | Dementia          | 134    | Diabetes, Mood              | 19     | Dementia          | 368    |
| Immunization                | 4      | Accidents, Trauma | 89     | Eye, Ear                    | 3      | Accidents, Trauma | 120    |
| Colorectal Cancer Screening | 10     | Infectious        | 268    | Immunization                | 17     | Infectious        | 314    |
| Breast Cancer Screening     | 12     | Colorectal Cancer | 56     | Colorectal Cancer Screening | 4      | Colorectal Cancer | 42     |
| Musculoskeletal             | 6      | Breast Cancer     | 28     | Breast Cancer Screening     | 3      | Breast Cancer     | 18     |
|                             | 144    | Frailty           | 525    | Musculoskeletal             | 125    | Frailty           | 352    |

Notes: Deaths are per 100,000 elderly Medicare beneficiaries. Cost per case is in \$2010 US dollars. IHD: Ischemic heart disease; CHF: Congestive heart failure; PVD: Peripheral vascular disease; CVD: Cerebrovascular disease.

**Table B9: Impact of Behavioral Risk Factors on Condition Prevalence**

| <b>Condition</b>                                | <b>Relative Risk<sup>1</sup></b>        |                             |                                  |                              |
|-------------------------------------------------|-----------------------------------------|-----------------------------|----------------------------------|------------------------------|
|                                                 | <b>Obesity</b>                          |                             | <b>Smoking</b>                   |                              |
|                                                 | <b>Estimated<br/>Obese/morbid obese</b> | <b>Clinical<br/>Studies</b> | <b>Estimated<br/>Ever Smoker</b> | <b>Clinical<br/>Studies</b>  |
| Ischemic heart disease                          | 1.20/1.25                               | 1.14 <sup>2*</sup>          | 1.19                             | 1.32–3.29 <sup>3</sup>       |
| Other Heart and vascular                        | 1.09/1.15                               | —                           | 1.05                             | 1.15–7.25 <sup>3</sup>       |
| Strokes / Cerebrovascular                       | 1.03/1.03                               | 1.13–1.16 <sup>2</sup>      | 1.14                             | 1.10–2.27 <sup>3</sup>       |
| Diabetes                                        | 2.20/3.19                               | 5.01–6.37 <sup>2</sup>      | 1.01                             | 1.00–1.54 <sup>3</sup>       |
| Lung cancer                                     | 0.68/0.49                               | 0.65–0.70 <sup>2</sup>      | 3.89                             | 6.38–28.29 <sup>3</sup>      |
| Colorectal cancer                               | 1.02/0.94                               | 0.99–1.26 <sup>2</sup>      | 1.04                             | 0.6–3.05 <sup>3</sup>        |
| Breast cancer                                   | 0.64/0.84                               | 1.25 <sup>2</sup>           | 0.69                             | 0.55–3.30 <sup>3</sup>       |
| Depression                                      | 1.07/1.28                               | 1.55                        | 1.06                             | 1.28                         |
| Chronic obstructive<br>pulmonary disease (COPD) | 0.82/1.04                               | 1.0 <sup>2</sup>            | 2.65                             | 22.35–<br>26.61 <sup>3</sup> |
| Frailty                                         | 1.70/2.76                               | 1.27 <sup>4</sup>           | 1.16                             | 1.20 <sup>4</sup>            |

<sup>1</sup>Calculated using coefficients from regressions of obesity categories and ever smoking on all conditions among those age 65-69 in pooled 1999–2012 MCBS. Relative risks were calculated for underweight, overweight, obese, and morbidly obese; numbers shown are for obese/morbid obese. Comparison to literature shown for selected conditions, primarily from two summative reports: <sup>2</sup>Lobstein & Leach 2010 and <sup>3</sup>CDC 2014. The range given for obesity (BMI of 30+) is across genders (with adjustments for older ages for some conditions), and the range given for smoking is across genders, current/former smokers, and age 65-74 and 75+. \*multiply this IHD risk for obesity by 2.5 for current smokers. Frailty RR's are from <sup>4</sup>Dunlop et al. 2015.

**Table B10: Changes in Smoking and Body-Mass Index Category  
by Age Group in MCBS, 1999–2012**

|                        | <u>Age</u> | 1999 | 2012 | Change |
|------------------------|------------|------|------|--------|
| <b>Smoking</b>         |            |      |      |        |
| Never                  | 65-74      | 0.36 | 0.39 | 0.03   |
|                        | 75-84      | 0.45 | 0.42 | -0.03  |
|                        | 85+        | 0.62 | 0.58 | -0.05  |
| Former                 | 65-74      | 0.49 | 0.48 | -0.01  |
|                        | 75-84      | 0.47 | 0.51 | 0.04   |
|                        | 85+        | 0.33 | 0.40 | 0.07   |
| Current                | 65-74      | 0.15 | 0.13 | -0.02  |
|                        | 75-84      | 0.08 | 0.07 | -0.01  |
|                        | 85+        | 0.04 | 0.03 | -0.02  |
| <b>Body-Mass Index</b> |            |      |      |        |
| Underweight            | 65-74      | 0.02 | 0.02 | -0.01  |
|                        | 75-84      | 0.04 | 0.03 | -0.01  |
|                        | 85+        | 0.10 | 0.06 | -0.04  |
| Normal weight          | 65-74      | 0.31 | 0.25 | -0.06  |
|                        | 75-84      | 0.39 | 0.32 | -0.07  |
|                        | 85+        | 0.51 | 0.43 | -0.07  |
| Overweight             | 65-74      | 0.41 | 0.39 | -0.03  |
|                        | 75-84      | 0.38 | 0.39 | 0.01   |
|                        | 85+        | 0.30 | 0.36 | 0.06   |
| Obese                  | 65-74      | 0.18 | 0.22 | 0.04   |
|                        | 75-84      | 0.14 | 0.18 | 0.04   |
|                        | 85+        | 0.08 | 0.12 | 0.04   |
| Morbid obese           | 65-74      | 0.08 | 0.12 | 0.05   |
|                        | 75-84      | 0.05 | 0.08 | 0.03   |
|                        | 85+        | 0.02 | 0.03 | 0.01   |

Note: Self-reported smoking status and BMI calculated from self-reported height and weight.

**Table B11: Productivity of Medical Care by Condition, MCBS 1999–2012 (Estimates and 95% Confidence Interval from 1,000 Bootstrap Samples)**

|                                     | Prevalence | Cost                                     | QALE                         | Value of a Year of Life                    |                                           |                                             | 3% discount rate                         |
|-------------------------------------|------------|------------------------------------------|------------------------------|--------------------------------------------|-------------------------------------------|---------------------------------------------|------------------------------------------|
|                                     |            |                                          |                              | \$100,000                                  | \$50,000                                  | \$200,000                                   |                                          |
| <b>Overall</b>                      |            | <b>\$57,931</b><br>(\$46,105 - \$69,169) | <b>1.69</b><br>(0.72 - 2.51) | <b>\$110,736</b><br>(\$13,958 - \$187,660) | <b>\$26,403</b><br>(\$-18,381 - \$64,960) | <b>\$279,403</b><br>(\$86,501 - \$440,168)  | <b>\$64,691</b><br>(\$780 - \$116,340)   |
| <b>Cardiovascular diseases</b>      | <b>75%</b> | <b>\$5,528</b><br>(\$-190 - \$10,961)    | <b>0.95</b><br>(0.60 - 1.22) | <b>\$89,592</b><br>(\$56,889 - \$116,214)  | <b>\$42,032</b><br>(\$25,196 - \$56,375)  | <b>\$184,713</b><br>(\$116,822 - \$237,542) | <b>\$56,702</b><br>(\$35,842 - \$73,758) |
| Ischemic heart disease              | 35%        | \$4,995<br>(\$-1,499 - \$11,577)         | 0.86<br>(0.55 - 1.10)        | \$80,522<br>(\$50,698 - \$106,119)         | \$37,764<br>(\$21,884 - \$51,484)         | \$166,039<br>(\$107,051 - \$216,014)        | \$51,070<br>(\$32,116 - \$67,403)        |
| Congestive heart failure            | 17%        | \$14,047<br>(\$5,171 - \$24,220)         | 0.35<br>(-0.08 - 0.67)       | \$20,538<br>(\$-20,860 - \$53,924)         | \$3,246<br>(\$-19,051 - \$21,292)         | \$55,122<br>(\$-26,764 - \$11,9701)         | \$11,358<br>(\$-15,339 - \$32,712)       |
| Other heart vascular disease        | 64%        | -\$1,399<br>(\$-6,162 - \$3,143)         | 0.41<br>(0.22 - 0.55)        | \$42,110<br>(\$24,773 - \$57,346)          | \$21,755<br>(\$12,227 - \$30,627)         | \$82,821<br>(\$47,821 - \$111,975)          | \$27,115<br>(\$15,667 - \$36,797)        |
| Strokes and cerebrovascular disease | 21%        | \$4,473<br>(\$-2,758 - \$12,415)         | 0.45<br>(0.21 - 0.67)        | \$40,087<br>(\$15,830 - \$63,022)          | \$17,807<br>(\$3,353 - \$30,744)          | \$84,646<br>(\$38,473 - \$12,9374)          | \$25,078<br>(\$9,003 - \$39,606)         |
| <b>Cardiovascular risk factors</b>  | <b>84%</b> | <b>\$15,586</b><br>(\$8,396 - \$23,300)  | <b>0.20</b><br>(0.12 - 0.29) | <b>\$4,432</b><br>(\$-7,593 - \$17,333)    | <b>-\$5,577</b><br>(\$-14,864 - \$3,400)  | <b>\$24,450</b><br>(\$4,917 - \$45,190)     | <b>\$382</b><br>(\$-7,565 - \$8,873)     |
| <b>Cancers</b>                      | <b>45%</b> | <b>-\$207</b><br>(\$-8,031 - \$7,787)    | <b>0.39</b><br>(0.15 - 0.61) | <b>\$39,204</b><br>(\$13,647 - \$62,333)   | <b>\$19,705</b><br>(\$4,832 - \$33,256)   | <b>\$78,201</b><br>(\$28,461 - \$122,039)   | <b>\$24,614</b><br>(\$7,604 - \$39,523)  |
| Lung cancer                         | 2%         | \$23,955<br>(\$-6,505 - \$68,949)        | 0.39<br>(-1.00 - 1.71)       | \$14,892<br>(\$-126,533 - \$141,781)       | -\$4,532<br>(\$-79,305- \$65,681)         | \$53,739<br>(\$-215,915 - \$307,919)        | \$10,631<br>(\$-96,202 - \$105,105)      |
| Colon cancer                        | 3%         | -\$2,401<br>(\$-17,470 - \$12470)        | 0.36<br>(-0.61 - 1.22)       | \$38,046<br>(\$-57,794 - \$126,309)        | \$20,224<br>(\$-28,842 - \$65,625)        | \$73,691<br>(\$-121,072 - \$247,771)        | \$24,543<br>(\$-35,780 - \$80,922)       |
| Prostate cancer                     | 5%         | \$9,521                                  | 0.02                         | -\$7,092                                   | -\$8,306                                  | -\$4,664                                    | -\$6,769                                 |

|                                          |            |                                                |                                      |                                                  |                                                 |                                                  |                                                 |
|------------------------------------------|------------|------------------------------------------------|--------------------------------------|--------------------------------------------------|-------------------------------------------------|--------------------------------------------------|-------------------------------------------------|
|                                          |            | (\$-292 - \$20,163)                            | (-0.67 - 0.71)                       | (\$-78,122 - \$60,626)                           | (\$-44,635 - \$26,811)                          | (\$-147,290 - \$134,072)                         | (\$-51,217 - \$34,183)                          |
| Breast cancer                            | 5%         | \$1,259<br>(\$-7,783 - \$12,868)               | 0.18<br>(-0.28 - 0.64)               | \$16,372<br>(\$-29,811 - \$63,550)               | \$7,557<br>(\$-17,053 - \$32,865)               | \$34,004<br>(\$-57,051 - \$127,781)              | \$8,956<br>(\$-20,495 - \$39,010)               |
| Other cancers and neoplasm               | 40%        | -\$2,576<br>(\$-11,354 - \$5,865)              | 0.37<br>(0.16 - 0.57)                | \$39,330<br>(\$16,839 - \$61,102)                | \$20,953<br>(\$7,125 - \$33,453)                | \$76,083<br>(\$33,036 - \$117,941)               | \$25,074<br>(\$10,665 - \$38,864)               |
| <hr/>                                    |            |                                                |                                      |                                                  |                                                 |                                                  |                                                 |
| <b>Mental Health</b>                     | <b>44%</b> | <b>\$5,018</b><br><b>(\$-510 - \$10,494)</b>   | <b>0.17</b><br><b>(-0.15 - 0.38)</b> | <b>\$11,571</b><br><b>(\$-18,549 - \$33,996)</b> | <b>\$3,277</b><br><b>(\$-12,069 - \$14,976)</b> | <b>\$28,160</b><br><b>(\$-33,712 - \$72,678)</b> | <b>\$7,754</b><br><b>(\$-11,244 - \$22,146)</b> |
| Dementia                                 | 12%        | \$5,591<br>(\$-3,676 - \$14,795)               | 0.11<br>(-0.27 - 0.43)               | \$5,280<br>(\$-33,528 - \$37,010)                | -\$155<br>(\$-21,569 - \$17,081)                | \$16,150<br>(\$-60,346 - \$80,440)               | \$2,102<br>(\$-23,236 - \$22,521)               |
| Mental health and tobacco/<br>drug abuse | 39%        | \$3,876<br>(\$-1,595 - \$9,077)                | 0.15<br>(-0.10 - 0.34)               | \$11,272<br>(\$-13,351 - \$31,044)               | \$3,698<br>(\$-8,551 - \$15,001)                | \$26,420<br>(\$-24,019 - \$64,569)               | \$7,994<br>(\$-7,318 - \$20,889)                |
| <hr/>                                    |            |                                                |                                      |                                                  |                                                 |                                                  |                                                 |
| <b>Central Nervous System</b>            | <b>79%</b> | <b>\$3,546</b><br><b>(\$-4,720 - \$11,406)</b> | <b>0.05</b><br><b>(-0.10 - 0.17)</b> | <b>\$1,784</b><br><b>(\$-14,824 - \$15,819)</b>  | <b>-\$881</b><br><b>(\$-11,475 - \$8,872)</b>   | <b>\$7,115</b><br><b>(\$-24,422 - \$31,226)</b>  | <b>\$832</b><br><b>(\$-9,984 - \$10,537)</b>    |
| Major disease of the CNS                 | 40%        | \$4,589<br>(\$111 - \$9,111)                   | 0.10<br>(-0.21 - 0.33)               | \$5,327<br>(\$-25,001 - \$28,596)                | \$369<br>(\$-14,360 - \$12,139)                 | \$15,242<br>(\$-46,264 - \$61,708)               | \$3,102<br>(\$-16,118 - \$18,189)               |
| Eye, Ear and other diseases<br>of CNS    | 72%        | \$1,331<br>(\$-7,499 - \$9,403)                | 0.00<br>(0.0 - 0.00)                 | -\$1,019<br>(\$-9,143 - \$7,786)                 | -\$1,175<br>(\$-9,272 - \$7,640)                | -\$707<br>(\$-8,868 - \$8,123)                   | -\$821<br>(\$-6,911 - \$5,786)                  |
| <b>Respiratory System</b>                | <b>71%</b> | <b>\$3,500</b><br><b>(\$-1,826 - \$8,593)</b>  | <b>0.11</b><br><b>(-0.15 - 0.29)</b> | <b>\$7,038</b><br><b>(\$-18,060 - \$25,372)</b>  | <b>\$1,769</b><br><b>(\$-10,819 - \$11,778)</b> | <b>\$17,576</b><br><b>(\$-32,584 - \$53,514)</b> | <b>\$3,865</b><br><b>(\$-11,872 - \$15,661)</b> |
| Respiratory symptoms,<br>COPD, Asthma    | 62%        | \$3,828<br>(\$-1,581 - \$8,924)                | 0.20<br>(0.04 - 0.31)                | \$15,781<br>(\$-936 - \$28,224)                  | \$5,977<br>(\$-3,224 - \$13,730)                | \$35,390<br>(\$1,795 - \$58,538)                 | \$9,387<br>(\$-1,335 - \$17,606)                |
| Infectious disease                       | 37%        | \$384<br>(\$-4,439 - \$5,532)                  | -0.12<br>(-0.41 - 0.09)              | -\$12,630<br>(\$-39,294 - \$8,279)               | -\$6,507<br>(\$-19,888 - \$4,867)               | -\$24,876<br>(\$-80,225 - \$16,092)              | -\$8,132<br>(\$-25,032 - \$5,166)               |

|                                                 |            |                                                |                                      |                                                   |                                                 |                                                   |                                                  |
|-------------------------------------------------|------------|------------------------------------------------|--------------------------------------|---------------------------------------------------|-------------------------------------------------|---------------------------------------------------|--------------------------------------------------|
| <b>Kidney Disease</b>                           | <b>61%</b> | <b>\$7,772</b><br><b>(\$3,714 - \$11,411)</b>  | <b>0.02</b><br><b>(-0.16 - 0.18)</b> | <b>-\$5,859</b><br><b>(\$-23,619 - \$10,800)</b>  | <b>-\$6,815</b><br><b>(\$-16,517 - \$2,026)</b> | <b>-\$3,946</b><br><b>(\$-39,620 - \$28,587)</b>  | <b>-\$4,790</b><br><b>(\$-16,243 - \$5,783)</b>  |
| Chronic Renal Failure or ESRD                   | 11%        | -\$840<br>(\$-10,425 - \$7,880)                | 0.14<br>(-0.35 - 0.55)               | \$14,878<br>(\$-32,737 - \$55,270)                | \$7,859<br>(\$-16,863 - \$29,467)               | \$28,916<br>(\$-68,031 - \$11,0079)               | \$10,071<br>(\$-20,211 - \$36,522)               |
| Acute Renal Failure                             | 8%         | \$12,229<br>(\$2,750 - \$22,191)               | 0.41<br>(-0.28 - 0.9)                | \$28,707<br>(\$-36,128 - \$77,157)                | \$8,239<br>(\$-24,050 - \$32,205)               | \$69,642<br>(\$-65,126 - \$164,602)               | \$18,244<br>(\$-24,867 - \$50,388)               |
| Other genitourinary disease                     | 57%        | \$6,793<br>(\$2,944 - \$9,934)                 | -0.06<br>(-0.2 - 0.1)                | -\$12,987<br>(\$-28,183 - \$3,025)                | -\$9,890<br>(\$-17,770 - \$-1,362)              | -\$19,181<br>(\$-48,835 - \$124,03)               | -\$9,508<br>(\$-18,661 - \$531)                  |
| <b>Frailty</b>                                  | <b>42%</b> | <b>\$4,549</b><br><b>(\$-1,568 - \$11,498)</b> | <b>0.27</b><br><b>(-0.24 - 0.76)</b> | <b>\$22,526</b><br><b>(\$-27,856 - \$71,206)</b>  | <b>\$8,988</b><br><b>(\$-16,701 - \$32,971)</b> | <b>\$49,600</b><br><b>(\$-51,329 - \$146,488)</b> | <b>\$14,318</b><br><b>(\$-18,427 - \$46,140)</b> |
| <b>Musculoskeletal</b>                          | <b>85%</b> | <b>\$14,212</b><br><b>(\$77,36 - \$20,976)</b> | <b>0.11</b><br><b>(-0.17 - 0.38)</b> | <b>-\$3,011</b><br><b>(\$-30,527 - \$23,908)</b>  | <b>-\$8,612</b><br><b>(\$-22,812 - \$5,292)</b> | <b>\$8,189</b><br><b>(\$-47,633 - \$61,724)</b>   | <b>-\$2,235</b><br><b>(\$-19,293 - \$14,588)</b> |
| Arthritis, back pain, and other musculoskeletal | 80%        | \$14,041<br>(\$7,778 - \$20,223)               | 0.16<br>(0.03 - 0.28)                | \$2,305<br>(\$-12,195 - \$15,248)                 | -\$5,868<br>(\$-15,581 - \$2,366)               | \$18,652<br>(\$-8,703 - \$42,805)                 | \$1,350<br>(\$-8,461 - \$9,986)                  |
| Injury (accidents, falls, poisonings)           | 46%        | \$1,792<br>(\$-3,133 - \$6,595)                | -0.08<br>(-0.54 - 0.36)              | -\$9,573<br>(\$-52,492 - \$34,436)                | -\$5,683<br>(\$-26,774 - \$15,940)              | -\$17,354<br>(\$-105,637-\$70,302)                | -\$6,477<br>(\$-32,453 - \$20,743)               |
| <b>Endocrine, GI, Liver, Hematologic</b>        | <b>78%</b> | <b>\$9,963</b><br><b>(\$4,199 - \$15,525)</b>  | <b>0.24</b><br><b>(0 - 0.43)</b>     | <b>\$13,583</b><br><b>(\$-9, 499 - \$33, 214)</b> | <b>\$1,810</b><br><b>(\$-10,946 - \$12,794)</b> | <b>\$37,128</b><br><b>(\$-7,874 - \$75,483)</b>   | <b>\$7,260</b><br><b>(\$-7,423 - \$19,997)</b>   |
| Other Endocrine (including menopause)           | 53%        | \$5,427<br>(\$-368 - \$11,078)                 | 0.21<br>(0.06 - 0.34)                | \$15,568<br>(\$-550 - \$30,009)                   | \$5,071<br>(\$-4,200 - \$13,991)                | \$36,564<br>(\$6,069 - \$62,687)                  | \$9,312<br>(\$-982 - \$18,777)                   |
| Gastro and Liver                                | 55%        | \$3,099<br>(\$-1,893 - \$8,037)                | 0.08<br>(-0.1 - 0.26)                | \$5,137<br>(\$-14,034 - \$23,846)                 | \$1,019<br>(\$-9,255 - \$11,773)                | \$13,372<br>(\$-23,544 - \$50,190)                | \$2,617<br>(\$-9,539 - \$14,606)                 |
| Hematologic                                     | 32%        | \$9,812<br>(\$5,041 - \$14,795)                | 0.08<br>(-0.11 - 0.24)               | -\$1,705<br>(\$-20,801 - \$15,718)                | -\$5,758<br>(\$-15,341 - \$4,720)               | \$6,402<br>(\$-30,944 - \$39,111)                 | -\$2,335<br>(\$-14,187 - \$8,856)                |

|                                         |     |                                  |                         |                                     |                                    |                                      |                                     |
|-----------------------------------------|-----|----------------------------------|-------------------------|-------------------------------------|------------------------------------|--------------------------------------|-------------------------------------|
| Miscellaneous                           | 80% | \$10,747<br>(\$1,693 - \$18,507) | 0.03<br>(-0.23 - 0.34)  | -\$7,310<br>(\$-34,050 - \$23,943)  | -\$9,028<br>(\$-23,743 - \$8,247)  | -\$3,872<br>(\$-56,842 - \$56,534)   | -\$5,986<br>(\$-22,697 - \$13,786)  |
| After care                              | 36% | \$14,369<br>(\$8,817 - \$19,969) | 0.06<br>(-0.16 - 0.24)  | -\$8,345<br>(\$-30,587 - \$11,114)  | -\$11,357<br>(\$-22,741 - \$-542)  | -\$2,320<br>(\$-46,855 - \$34,827)   | -\$6,575<br>(\$-20,631 - \$5,633)   |
| General symptoms and other disease      | 76% | \$4,390<br>(\$-4,441 - \$11,992) | 0.01<br>(-0.25 - 0.3)   | -\$3,670<br>(\$-30,201 - \$27,406)  | -\$4,030<br>(\$-19,084 - \$13,382) | -\$2,950<br>(\$-55,693 - \$55,148)   | -\$3,128<br>(\$-20,136 - \$16,622)  |
| Prevention and screening                | 75% | -\$2,587<br>(\$-5,123 - \$770)   | -0.23<br>(-0.58 - 0.24) | -\$20,068<br>(\$-54,344 - \$28,339) | -\$8,741<br>(\$-25,666 - \$16,051) | -\$42,724<br>(\$-112,155 - \$52,615) | -\$15,008<br>(\$-39,679 - \$20,635) |
| Immunizations and infectious screening  | 53% | -\$94<br>(\$-3,268 - \$2,973)    | 0.01<br>(0.01 - 0.01)   | \$911<br>(\$-2,198 - \$4,103)       | \$503<br>(\$-2,582 - \$3,686)      | \$1,728<br>(\$-1,360 - \$4,924)      | \$552<br>(\$-1,768 - \$2,941)       |
| Screening: Breast and Colorectal cancer | 34% | -\$603<br>(\$-5,587 - \$4,858)   | -0.03<br>(-0.07 - 0.00) | -\$2,586<br>(\$-9,343 - \$4,012)    | -\$991<br>(\$-6,899 - \$4,710)     | -\$5,775<br>(\$-15,051 - \$3,163)    | -\$1,437<br>(\$-6,168 - \$3,134)    |
| Well care                               | 34% | -\$4,775<br>(\$-10,234 - \$455)  | 0.06<br>(-1.04 - 1.13)  | \$10,288<br>(\$-98,012 - \$117,900) | \$7,532<br>(\$-47,513 - \$60,667)  | \$15,802<br>(\$-201,215 - \$231,353) | \$7,067<br>(\$-73,099 - \$86,550)   |

Note: Means from bootstrap samples do not exactly match those in Table 5 of the main paper.

## Appendix C: Sensitivity of Productivity Results

This appendix examines the extent to which our estimates of spending productivity are affected by several different changes in methodology.

### C.1 Productivity Analysis Omitting Quality of Life Change

First, we examine the impact of using longevity only, omitting quality of life. **Table C1** calculates results analogous to **Table 5** in the main paper, but using only the changes in life expectancy, with no adjustment for quality of life. **Figure C1** plots net value results analogous to **Figure 8** in the main paper, using only the changes in mortality. **Figure C2** plots the net value results using life expectancy against those from the main paper using QALE.

Because QOL changes were quite small for most conditions, results were similar when QOL was omitted. The rank order of conditions by productivity was largely the same using both LE and QALE, with some exceptions. Conditions for which we had found slight declines in QOL (colorectal cancer, dementia), ranked higher in productivity in the calculations using only LE. In contrast, disease categories that ranked lower in productivity when using only LE included frailty, lung cancer, and some mental health and musculoskeletal conditions. In general, changes in life expectancy are greater than changes in QALE because years of life are discounted by about one-third in forming QALE.

### C.2 Comparing Condition-Based Mortality Rates to Vital Statistics

**Figure C3** compares the change in mortality-by-cause estimated by our propensity score method to the change as reported by Vital Statistics (CDC, 1999-2012b), which uses the assigned primary underlying cause of death reported on official death certificates. The correlation across the conditions is 0.69.

The majority of the reduction in mortality is attributable to reductions for cardiovascular acute conditions. Within the category of acute cardiovascular disease, there is some variation by measurement method: ischemic heart disease accounts for a larger drop in the Vital Statistics data relative to our method, which attributes more deaths to other heart disease causes. But the overall total is very similar. For cancers, the trends are also similar. This is not surprising, as cancer is generally clear at the end of life.

Because the change in mortality rate for cardiovascular conditions overall is similar using

Vital Statistics and the propensity score method, the net value of medical treatment change is similar as well. **Table C2** shows that the net value for cardiovascular disease is \$77,000 using the Vital Statistics data and \$89,000 using the propensity score data.

### **C.3 Attributing Spending Using Different Methods**

Spending can be attributed to medical conditions using a variety of different methods. We consider differences in 2009, using three methods. The details of the implementation of each method are presented in Ghosh et al. (2020). The first method is most traditional (Rice et al., 1967); it attributes the dollars associated with each medical claim to the conditions that physicians list as its cause. The second method decomposes total spending for a person over a year to conditions based on a regression model (Trogdon, 2008). In this model, a single regression is estimated for spending, including all of the condition dummies. The third method is the method we employ, the propensity score model.

**Figure C4** shows the per capita spending attributed to different conditions using these three methods. Condition-specific spending estimated in these three ways is highly correlated. Across conditions, the correlations are 0.68 between the claims and regression methods, 0.79 between the claims and propensity score methods, and 0.84 between the regression and propensity score methods.

We prefer the propensity score method for a few reasons. First, the claims-attribution methodology is difficult to implement because most medical claims include several comorbid diagnosis codes. In our analysis, we divided up spending to multiple conditions using spending when each condition is presented on its own and using relative DRG weights, but there is no obvious reason why this is right. In addition, not all claims have diagnoses, for example pharmaceutical claims. Finally, conditions such as frailty are not recorded on claims. The regression-based cost estimation also has several limitations. First, it makes several parametric assumptions, which may not be satisfied. Second, there is a large residual spending that cannot be attributed to any disease. This is shown in the last row of **Figure C4**. Finally, out-of-sample predictions have lower mean squared errors using the propensity score method.

We have not estimated costs using these three methods for all years, so we cannot compare the change in cost done each way. However, our findings for the comparison in 2009 suggest that the results would be unlikely to differ greatly using the other methods.

#### C.4 Estimating Trends Over Time

After estimating the per-case cost, mortality rate, and quality of life decrement, we smooth these estimates over years using a second-order polynomial for all 80 medical conditions. **Figure 5** in the paper shows an example for ischemic heart disease. To test the importance of smoothing, we compare the change in cost per case using predicted values in 1999 and 2012 to the average of actual values in 1999-01 and 2010-12. **Figure C5** shows a close relationship between the two.

**Figure C1: Net Value of Medical Spending Change by Condition Using Life Expectancy Only (not QOL), MCBS 1999–2012**

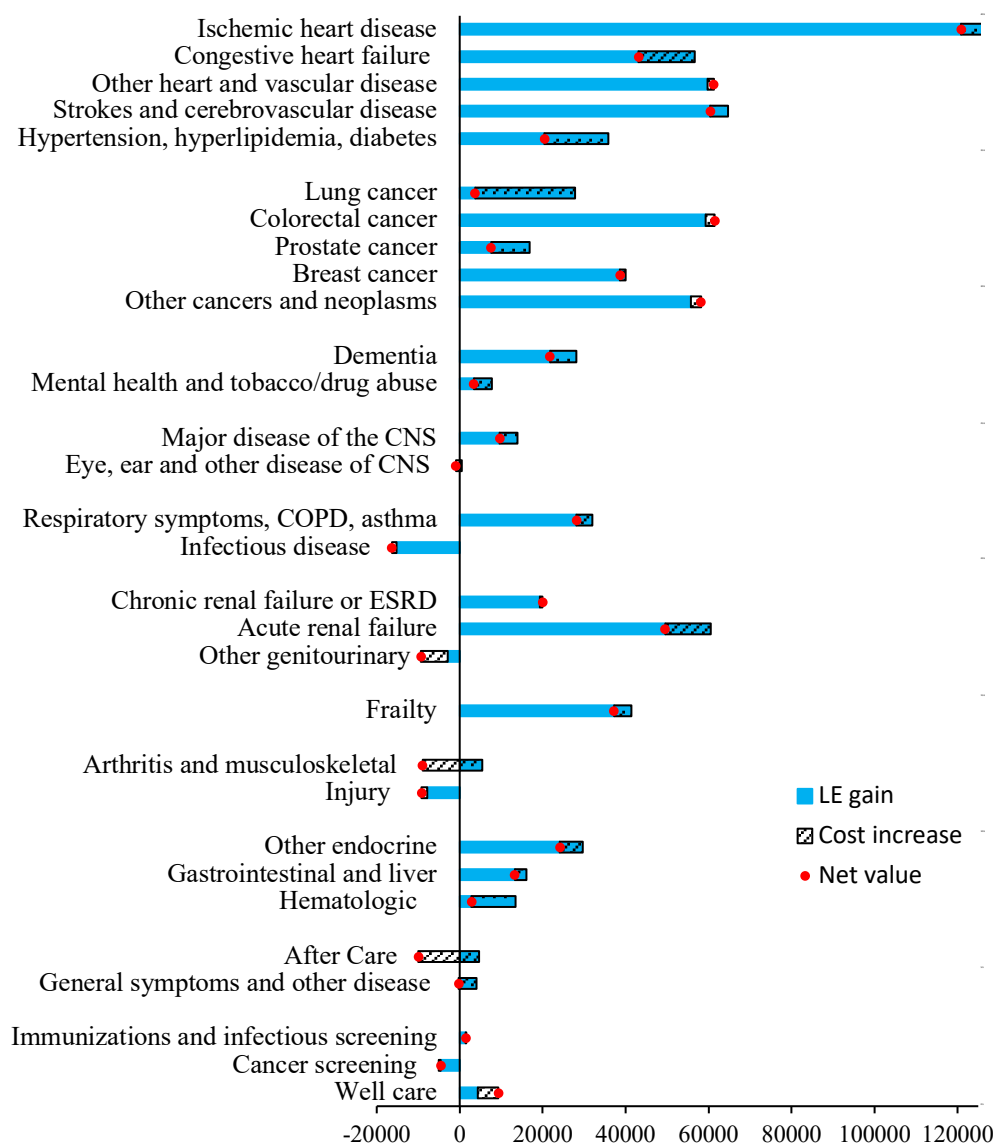

Note: Data are from the Medicare Current Beneficiary Survey with totals matching estimated national spending on the elderly. Spending is in real (\$2010) dollars. The blue bar depicts improvement in health outcomes over the period, expressed in dollars. Health change is the change in Life Expectancy attributed to medical care and not changes in the prevalence of the condition. The hatched bar shows the change in medical spending. The red dot shows the net productivity estimate, defined as the dollar value of health improvement minus the increase in spending.

**Figure C2: Comparison of Productivity of Medical Care by Disease Category, Using Life Expectancy Versus Quality-Adjusted Life Expectancy, 1999–2012**

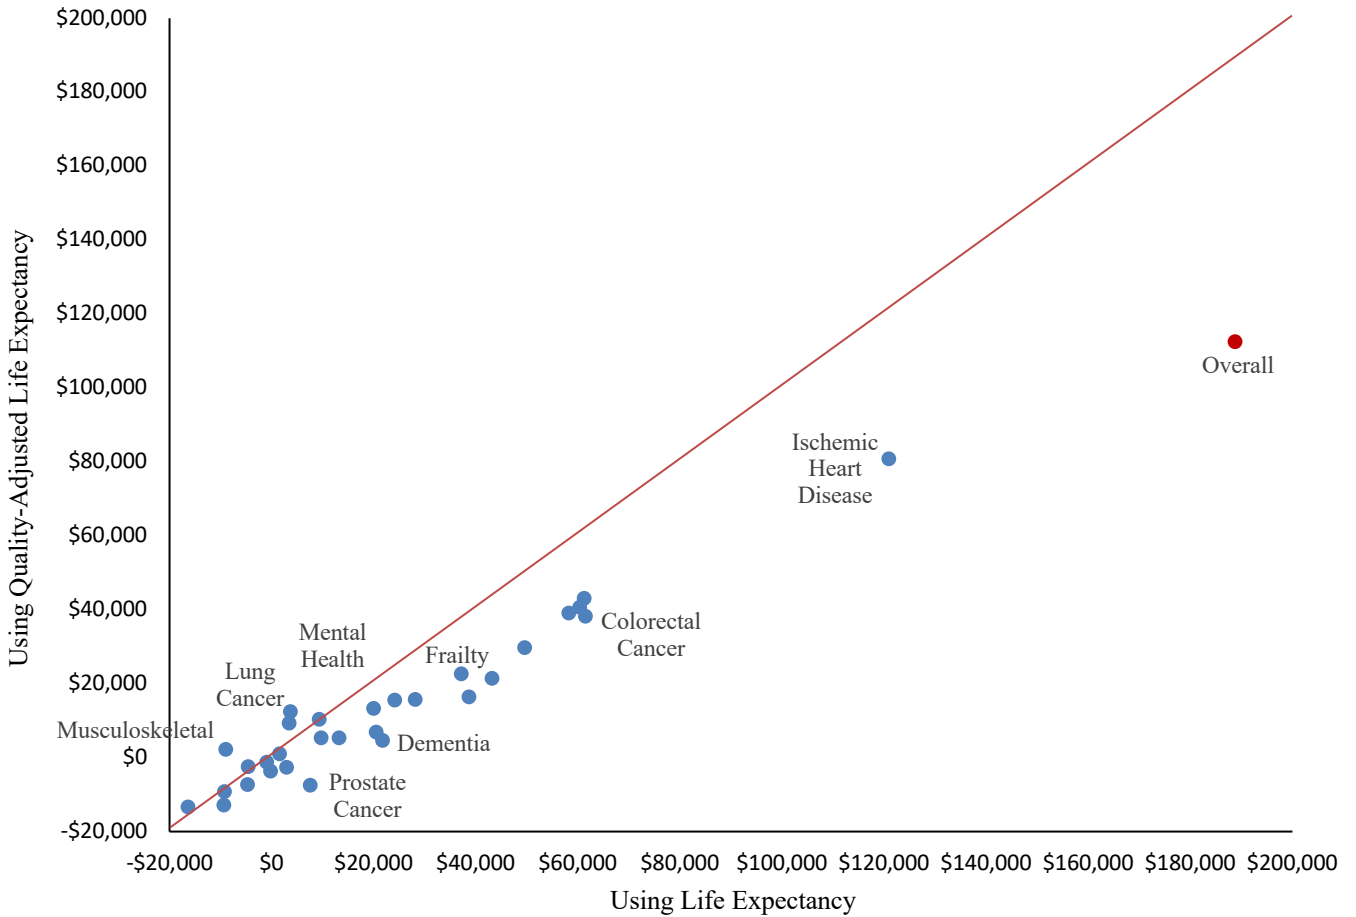

Note: Correlation=0.97. Most data points sit below the 45 degree line because life expectancy is by design higher than QALE, which discounts years of life to account for imperfect health, thus reducing the length of each projected year of life.

**Figure C3: Comparison of Mortality Change by Condition Using Mortality From Propensity Score Method Versus Vital Statistics Underlying Cause of Death, 1999-01 and 2010-12**

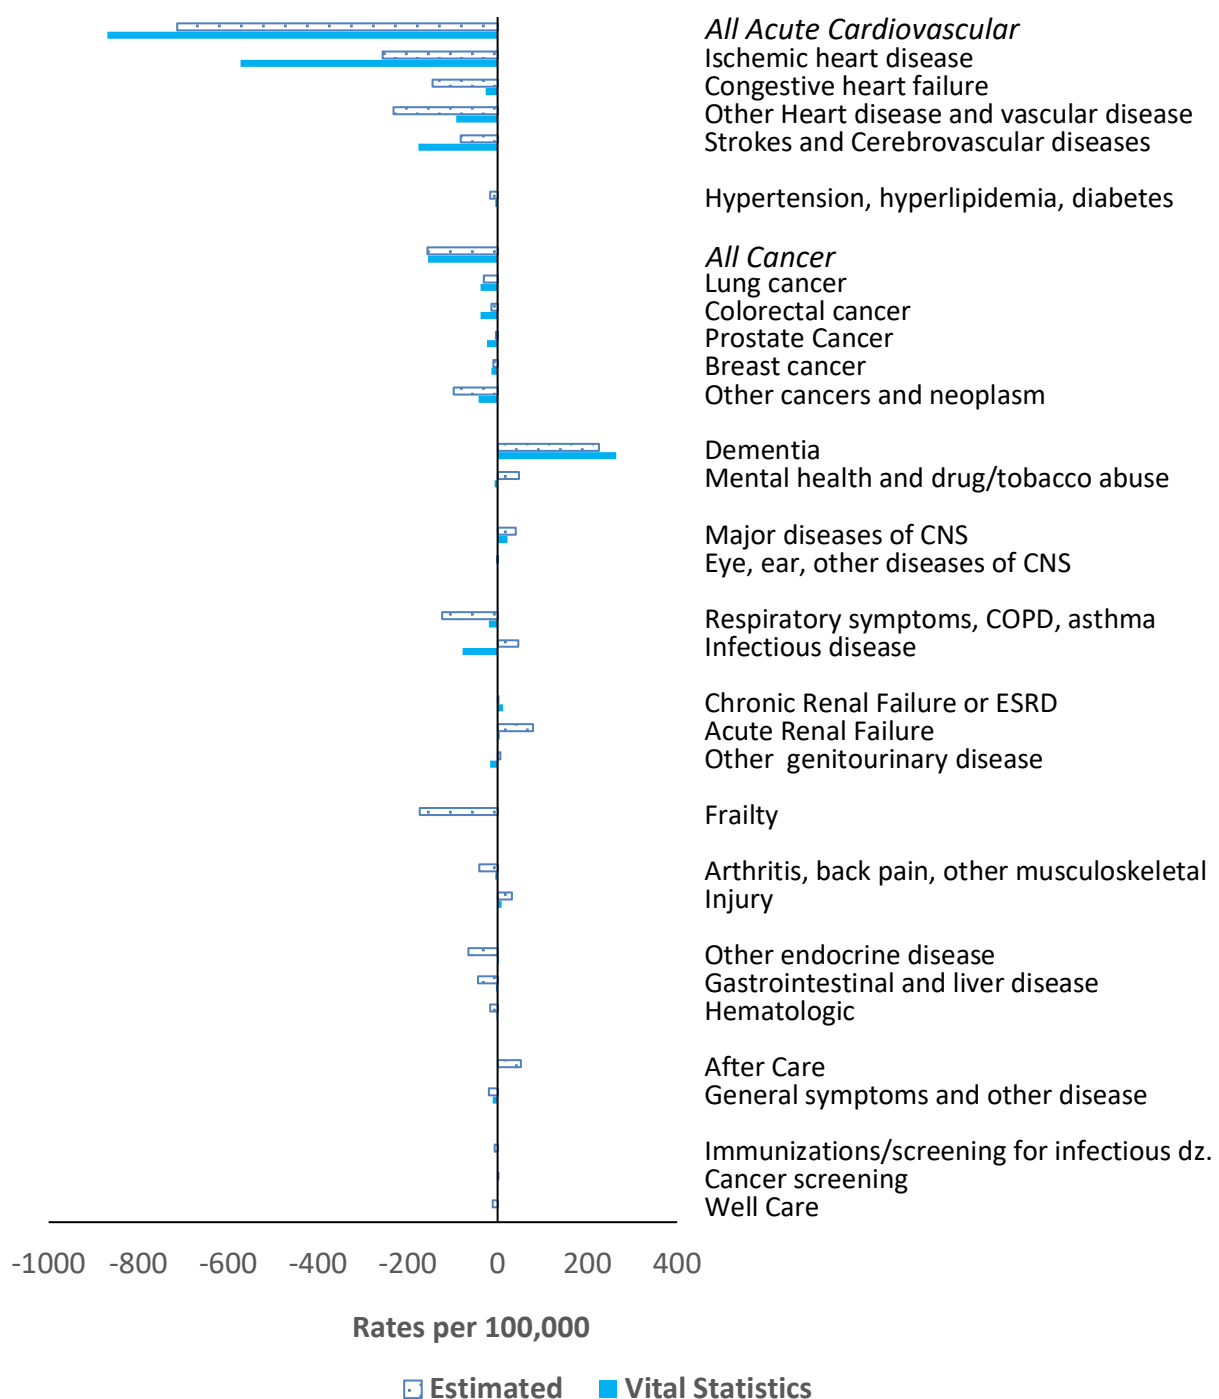

**Figure C4: Comparison of Attributed Spending to Diseases in 2009 MCBS, Using Different Attribution Methods: Claims, Regression, and Propensity Score**

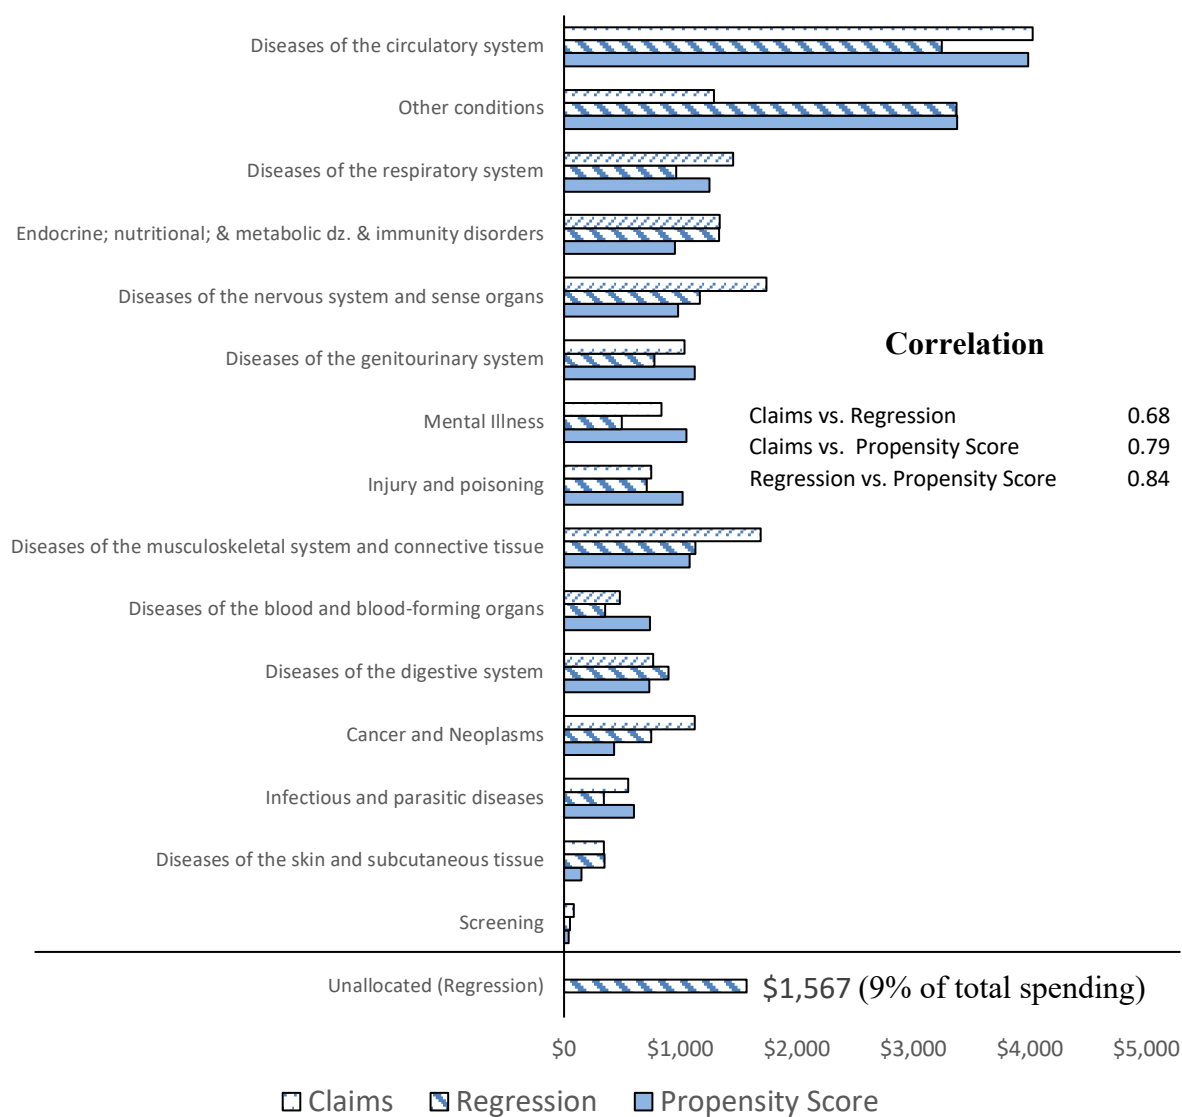

Note: Real per capita spending (\$2010) in 2009.

**Figure C5: Change in Cost per Case Using Predicted Values in 1999 and 2012 vs.  
Average of Actual Values in 1999-01 and 2010-12**

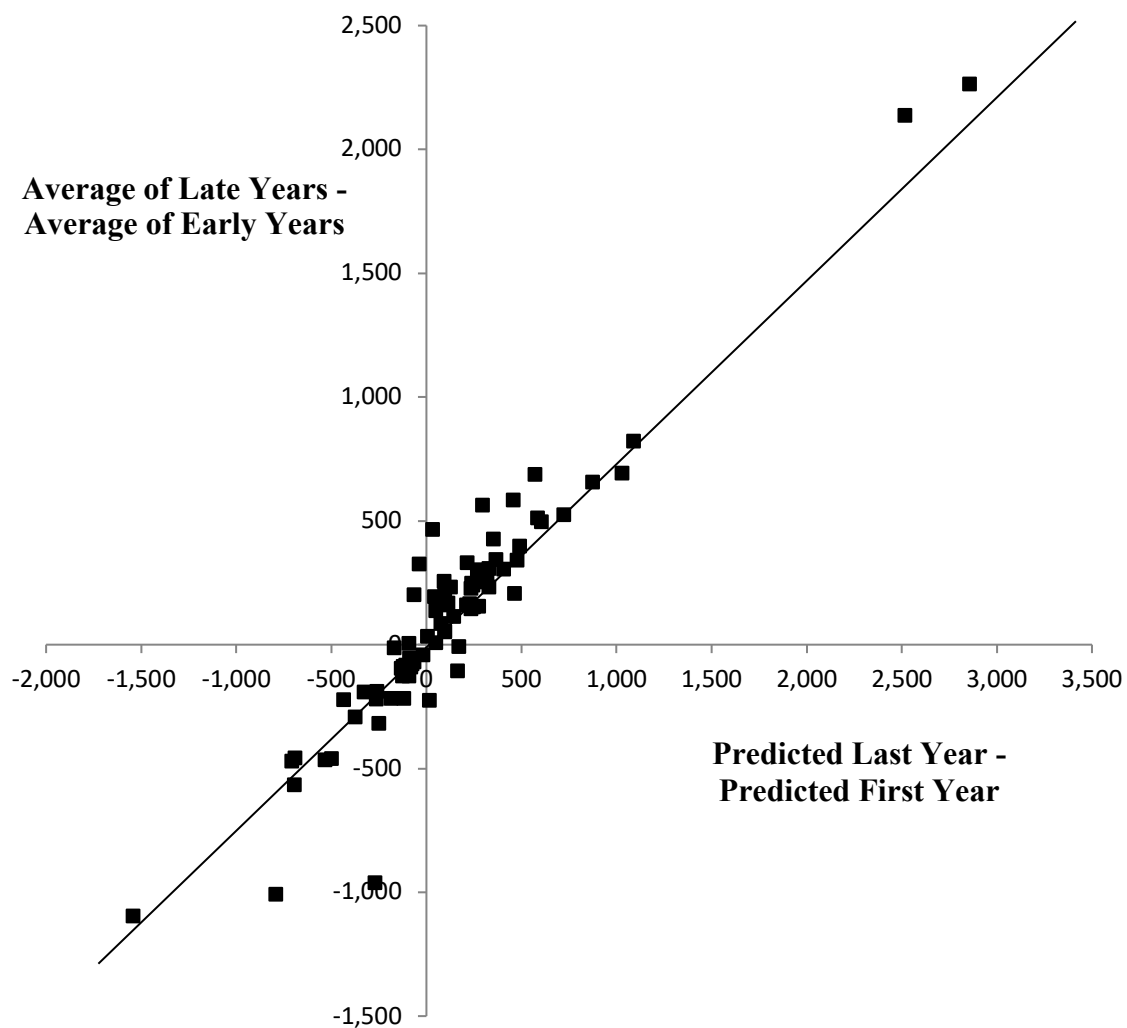

**Table C1: Net Value of Medical Care Per Capita Using Life Expectancy Only (not QALE)**

| Condition                                | Spending Change | LE Change | Value of a Year of Life |           |           | Disc rate (3%) |
|------------------------------------------|-----------------|-----------|-------------------------|-----------|-----------|----------------|
|                                          |                 |           | \$100,000               | \$50,000  | \$200,000 |                |
| <b>Overall</b>                           | \$57,893        | 2.47      | \$188,727               | \$65,417  | \$435,348 | \$108,327      |
| <b>Cardiovascular diseases</b>           | \$5,157         | 1.38      | \$133,175               | \$64,009  | \$271,506 | \$124,003      |
| Ischemic heart disease                   | \$5,054         | 1.26      | \$120,888               | \$57,917  | \$246,830 | \$92,879       |
| Congestive heart failure                 | \$13,569        | 0.57      | \$43,156                | \$14,793  | \$99,880  | \$50,458       |
| Other heart and vascular disease         | -\$1,573        | 0.60      | \$61,250                | \$31,412  | \$120,927 | \$64,695       |
| Strokes and cerebrovascular disease      | \$4,354         | 0.65      | \$60,367                | \$28,007  | \$125,088 | \$57,288       |
| <b>Cardiovascular risk factors</b>       | \$15,439        | 0.36      | \$20,423                | \$2,492   | \$56,285  | \$36,853       |
| <b>Cancers</b>                           | -\$80           | 0.60      | \$60,095                | \$30,087  | \$120,110 | \$52,384       |
| Lung cancer                              | \$24,099        | 0.28      | \$3,668                 | -\$10,216 | \$31,435  | \$43,430       |
| Colorectal cancer                        | -\$2,196        | 0.59      | \$61,444                | \$31,820  | \$120,692 | \$51,631       |
| Prostate cancer                          | \$9,211         | 0.17      | \$7,580                 | -\$815    | \$24,371  | \$14,661       |
| Breast cancer                            | \$1,272         | 0.40      | \$38,650                | \$18,689  | \$78,571  | \$27,761       |
| Other cancers and neoplasm               | -\$2,423        | 0.56      | \$58,193                | \$30,308  | \$113,963 | \$48,767       |
| <b>Mental Health</b>                     |                 |           |                         |           |           |                |
| Dementia                                 | \$5,568         | 0.14      | \$8,916                 | \$1,674   | \$23,399  | \$35,744       |
| Mental health and tobacco/drug abuse     | \$6,355         | 0.28      | \$21,723                | \$7,684   | \$49,800  | \$43,648       |
| <b>Central Nervous System (CNS)</b>      | \$3,446         | 0.07      | \$4,028                 | \$291     | \$11,502  | \$21,220       |
| Major disease of the CNS                 | \$4,213         | 0.14      | \$9,642                 | \$2,715   | \$23,497  | \$24,064       |
| Eye, ear, other disease of the CNS       | \$1,484         | 0.01      | -\$910                  | -\$1,197  | -\$335    | \$10,190       |
| <b>Respiratory System</b>                |                 |           |                         |           |           |                |
| Respiratory symptoms, COPD, asthma       | \$3,815         | 0.19      | \$15,575                | \$5,880   | \$34,966  | \$45,614       |
| Infectious disease                       | \$3,828         | 0.32      | \$28,157                | \$12,164  | \$60,142  | \$47,229       |
| <b>Kidney Disease</b>                    | \$1,082         | -0.15     | -\$16,336               | -\$8,709  | -\$31,589 | \$10,523       |
| Chronic renal failure or ESRD            |                 |           |                         |           |           |                |
| Acute renal failure                      | \$7,286         | 0.08      | \$1,060                 | -\$3,113  | \$9,406   | \$19,346       |
| Other genitourinary disease              | -\$645          | 0.19      | \$19,963                | \$10,304  | \$39,280  | \$31,230       |
| <b>Frailty</b>                           | \$4,168         | 0.41      | \$37,162                | \$16,497  | \$78,492  | \$50,668       |
| <b>Musculoskeletal</b>                   |                 |           |                         |           |           |                |
| Arthritis and musculoskeletal            | \$14,172        | 0.01      | -\$13,255               | -\$13,714 | -\$12,338 | \$27,454       |
| Injury                                   | \$14,416        | 0.055     | -\$8,926                | -\$11,671 | -\$3,437  | \$18,931       |
| <b>Endocrine, GI, Liver, Hematologic</b> | \$1,375         | -0.08     | -\$9,200                | -\$5,288  | -\$17,025 | \$18,286       |
| Other endocrine                          |                 |           |                         |           |           |                |
| Gastrointestinal and liver disease       | \$10,012        | 0.37      | \$26,635                | \$8,312   | \$63,282  | \$48,578       |
| Hematologic                              | \$5,525         | 0.30      | \$24,127                | \$9,301   | \$53,780  | \$31,721       |
| <b>Miscellaneous</b>                     | \$10,660        | 0.06      | -\$4,706                | -\$7,683  | \$1,248   | \$28,305       |
| After care                               | \$14,564        | 0.05      | -\$9,953                | -\$12,258 | -\$5,341  | \$15,389       |
| General symptoms and other disease       | \$4,365         | 0.04      | -\$243                  | -\$2,304  | \$3,880   | \$22,723       |
| <b>Prevention and screening</b>          |                 |           |                         |           |           |                |
| Immunizations and infectious screening   | -\$2,557        | 0.01      | \$3,206                 | \$2,881   | \$3,855   | \$5,899        |
| Cancer screening                         | -\$134          | 0.01      | \$1,497                 | \$816     | \$2,861   | \$4,116        |
| Well care                                | -\$519          | -0.05     | -\$4,576                | -\$2,028  | -\$9,671  | -\$4,825       |

Note: Spending change uses the present value of expected lifetime costs for each disease per person in the population. LE change is expected Life Expectancy at age 65 for each disease per person in the population. The discount rate is 0% in the columns varying the value of a year of life. The value of a year of life is \$100,000 in the column varying the discount rate.

**Table C2: Change in QALE and Net Value Using Mortality from Propensity Score Method in MCBS vs. Vital Statistics Data**

| <b>Condition</b>                     | <b>Propensity Score Data</b> |                   | <b>Vital Statistics Data</b> |                   |
|--------------------------------------|------------------------------|-------------------|------------------------------|-------------------|
|                                      | <b>QALE Change</b>           | <b>Net Value*</b> | <b>QALE Change</b>           | <b>Net Value*</b> |
| <b>Cardiovascular diseases</b>       | <b>0.94</b>                  | <b>\$89,327</b>   | <b>0.81</b>                  | <b>\$76,941</b>   |
| Ischemic Heart Disease               | 0.86                         | \$80,888          | 1.00                         | \$95,365          |
| Congestive heart failure             | 0.35                         | \$21,395          | -0.04                        | -\$17,360         |
| Other heart and vascular disease     | 0.41                         | \$43,058          | 0.21                         | \$23,694          |
| Strokes and cerebrovascular diseases | 0.45                         | \$40,750          | 0.66                         | \$61,491          |

\*Net value using the value of \$100,000 for a quality-adjusted year of life.

## Appendix D: Comparison to Disease Models

To benchmark our estimates of the impact of cardiovascular disease treatment trends on mortality among elderly people, we compare our estimates to a version of the IMPACT model (Ford et al., 2007; Capewell et al., 1999; Capewell et al., 2010; Ogata et al., 2019). The IMPACT model is a multistate model explaining coronary heart disease mortality. The model divides the population into seven groups: those in a hospital for a heart attack; those with angina pectoris; those who are post-heart attack; those who have had bypass surgery or a stent but have not had a heart attack; those with chronic angina; those with hypertension; and those with high cholesterol. It then estimates the contribution of treatment and risk factor changes to mortality. Within each disease state, clinical literature is used to parameterize the impact of different treatments and risk factors on mortality. For example, one element of the model is the impact of anti-hypertensive agents on the risk of death for people with prior heart disease.

The model was developed for the population as a whole (ages 25-84); we parameterize the model to estimate the sources of mortality reduction in the elderly (see Cutler et al., 2019). We assume the relative risks are the same for the elderly as for the non-elderly, but that the share of people receiving different treatments differs.

In addition, we extend the impact model to medical care for people with congestive heart failure and cerebrovascular disease. **Table D1** shows the sources we use for this.

**Table D1: Relative Risks for Cardiovascular Disease**

**Ischemic Heart Disease and Other Heart and Vascular Disease**

|                                                 | <b>Primary</b>              | <b>Secondary</b>            |
|-------------------------------------------------|-----------------------------|-----------------------------|
| ACE Inhibitors                                  | 0.80 (Yusuf et al., 2000)   |                             |
| ARBs                                            | 0.62 (Turnbull, 2007)       |                             |
| Beta blockers                                   | 0.62 (Psaty et al., 1989)   |                             |
| Statins                                         | 0.73 (Vreecer et al., 2003) |                             |
| Aspirin                                         | 0.73 (Hennekens, 2002)      | 0.79 (Hennekens, 2002)      |
| Metformin                                       | 0.89 (Griffin et al., 2017) | 0.89 (Griffin et al., 2017) |
| Insulin, Others diabetes meds                   | 0.89 (Griffin et al., 2017) | 0.89 (Griffin et al., 2017) |
| <b>Non-pharma impacts (Relative risk rates)</b> |                             |                             |
| Resuscitation in the community – AMI            | 0.05 (Nichol, 1999)         |                             |
| Resuscitation in the hospital – AMI             | 0.33 (Nadkarni, 2006)       |                             |
| Primary PCI – AMI                               | 0.32 (Cucherat, 2000)       |                             |
| Primary CABG – AMI                              | 0.39 (Yusuf, 1994)          |                             |
| CABG – Coronary heart disease                   | 0.43 (Yusuf, 1994)          |                             |
| Angioplasty - Coronary heart disease            | 0.32 (Fox, 2005)            |                             |
| Rehabilitation - AMI                            | 0.26 (Taylor, 2004)         |                             |
| Angioplasty - Chronic angina                    | 0.13 (Kaiser, 2005)         |                             |
| CABG – Chronic angina                           | 0.36 (Yusuf, 1994)          |                             |

**Congestive Heart Failure**

|                                         | <b>Primary</b>               | <b>Secondary</b> |
|-----------------------------------------|------------------------------|------------------|
| ACE Inhibitors                          | 0.77 (Fonarow, 2003, HOPE)   |                  |
| ARBs                                    | 0.68 (Fonarow, 2003, RENAAL) |                  |
| Beta blockers                           | 0.64 (Fonarow, 2003, SOLVD)  |                  |
| Statins                                 | 0.81 (Fonarow, 2003, 4S)     |                  |
| Aspirin                                 | 0.59 (Fonarow, 2003)         |                  |
| Metformin, Insulin Others diabetes meds | 0.81 (Romero, et al., 2013)  |                  |

**Stroke/Cerebrovascular**

|                                            | Primary                       | Secondary                     |
|--------------------------------------------|-------------------------------|-------------------------------|
| Antihypertensives                          | 0.58 (Ezekowitz, et al, 2003) | 0.72 (Ezekowitz, et al, 2003) |
| Statins                                    | 0.75 (Ezekowitz, et al, 2003) |                               |
| Aspirin                                    | 0.90 (Hennekens, 2002)        |                               |
| Metformin, Insulin Others diabetes meds    | 0.58 (Cheng et al., 2014)     |                               |
| <b>Non-pharma impacts (Relative risks)</b> |                               |                               |
| Carotid endarterectomy                     | 0.52 (Rothwell et al., 2003)  |                               |

## References

- Agency for Healthcare Research and Quality (AHRQ). 2004. "MEPS 2002 Full Year Consolidated Data File."  
[https://meps.ahrq.gov/mepsweb/data\\_stats/download\\_data\\_files\\_detail.jsp?cboPufNumber=HC-070](https://meps.ahrq.gov/mepsweb/data_stats/download_data_files_detail.jsp?cboPufNumber=HC-070) (accessed August 27, 2021).
- Aune, Dagfinn, S. Schlesinger, M. Neuenschwander, T. Feng, I. Janszky, T. Norat, and E. Riboli. "Diabetes Mellitus, Blood Glucose and the Risk of Heart Failure: A Systematic Review and Meta-Analysis of Prospective Studies." *Nutrition, Metabolism and Cardiovascular Diseases* 28, no. 11 (2018): 1081–91. <https://doi.org/10.1016/j.numecd.2018.07.005>.
- Austin, Peter C., "Balance diagnostics for comparing the distribution of baseline covariates between treatment groups in propensity-score matched samples" *Statistics in Medicine*, 2009, 28:3083–3107.
- Biessels, Geert Jan, Salka Staekenborg, Eric Brunner, Carol Brayne, and Philip Scheltens. "Risk of Dementia in Diabetes Mellitus: a Systematic Review." *The Lancet Neurology* 5, no. 1 (2006): 64–74. [https://doi.org/10.1016/s1474-4422\(05\)70284-2](https://doi.org/10.1016/s1474-4422(05)70284-2).
- Bozkurt, Biykem, D Aguilar, and A Deswal. "Hypertension, Obesity, Diabetes, Hyperlipidemia, and Metabolic Syndrome in Heart Failure." *Circulation* 134 (October 2016): e535–e578. <https://doi.org/https://doi.org/10.1161/CIR.0000000000000450>.
- Brunström, Mattias, and Bo Carlberg. "Association of Blood Pressure Lowering With Mortality and Cardiovascular Disease Across Blood Pressure Levels." *JAMA Internal Medicine* 178, no. 1 (January 2018): 28. <https://doi.org/10.1001/jamainternmed.2017.6015>.
- Capewell S, Morrison CE, McMurray JJ, "Contribution of modern cardiovascular treatment and risk factor changes to the decline in coronary heart disease mortality in Scotland between 1975 and 1994," *Heart* 1999;81:380-386.
- Capewell S, Ford ES, Croft JB, Critchley JA, Greenlund KJ, Labarthe DR. "Cardiovascular risk factor trends and potential for reducing coronary heart disease mortality in the United States of America." *Bull World Health Organ*. 2010;88(2):120–130.
- Carod-Artal, Francisco Javier. "Are Mood Disorders a Stroke Risk Factor?" *Stroke* 38, no. 1 (2007): 1–3. <https://doi.org/10.1161/01.str.0000251674.14708.9b>.
- Centers for Disease Control and Prevention. 1999-2012. "National Health and Nutrition Examination Survey" years 1999-2012.  
<https://wwwn.cdc.gov/nchs/nhanes> (accessed August 27, 2021).
- Centers for Disease Control and Prevention (CDC). 2002-2016. "National Vital Statistics report United States Life Tables," years 1999-2012.  
[https://www.cdc.gov/nchs/products/life\\_tables.htm#life](https://www.cdc.gov/nchs/products/life_tables.htm#life) (accessed August 27, 2021).

- Centers for Disease Control and Prevention (CDC, US). “The Health Consequences of Smoking—50 Years of Progress: A Report of the Surgeon General”. National Center for Chronic Disease Prevention and Health Promotion (US); Office on Smoking and Health (US). Atlanta (GA); 2014.
- Centers for Disease Control and Prevention, National Center for Health Statistics. 1999-2012. “Underlying Cause of Death 1999-2019 on CDC WONDER Online Database, released in 2020. Data are from the Multiple Cause of Death Files, 1999-2019, as compiled from data provided by the 57 vital statistics jurisdictions through the Vital Statistics Cooperative Program.” <http://wonder.cdc.gov/ucd-icd10.html> (accessed Sept 1, 2021).
- Centers for Medicare and Medicaid Services (CMS). 1999-2012a. “Medicare Current Beneficiary Survey (MCBS),” years 1999-2012. <https://www.cms.gov/Research-Statistics-Data-and-systems/Research/MCBS> (accessed August 27, 2021).
- Centers for Medicare and Medicaid Services (CMS). 1999–2012b. “National Health Expenditure Accounts.” Centers for Medicare and Medicaid Services. <https://www.cms.gov/Research-Statistics-Data-and-Systems/Statistics-Trends-and-Reports/NationalHealthExpendData/NationalHealthAccountsHistorical> (accessed June 9, 2021).
- Cheng YY, Leu HB, Chen TJ, Chen CL, Kuo CH, Lee SD, Kao C. “Metformin-inclusive Therapy Reduces the Risk of Stroke in Patients with Diabetes: A 4-Year Follow-up Study.” *Journal of Stroke and Cerebrovascular Diseases*. 2014 February; Volume 23, Issue 2, Pages e99-e105.
- Cheng, G., C. Huang, H. Deng, and H. Wang. “Diabetes as a Risk Factor for Dementia and Mild Cognitive Impairment: a Meta-Analysis of Longitudinal Studies.” *Internal Medicine Journal* 42, no. 5 (2012): 484–91. <https://doi.org/10.1111/j.1445-5994.2012.02758.x>.
- Chou, Roger, Tracy Dana, Ian Blazina, Monica Daeges, and Thomas L. Jeanne. “Statins for Prevention of Cardiovascular Disease in Adults.” *Jama* 316, no. 19 (2016): 2008. <https://doi.org/10.1001/jama.2015.15629>.
- Cohen, Jacob. *Statistical Power Analysis for the Behavioral Sciences (2nd ed)*. Hillsdale, NJ: Lawrence Erlbaum Associates, 1988.
- Correll, Christoph U., Marco Solmi, Nicola Veronese, Beatrice Bortolato, Stella Rosson, Paolo Santonastaso, Nita Thapa-Chhetri, et al. “Prevalence, Incidence and Mortality from Cardiovascular Disease in Patients with Pooled and Specific Severe Mental Illness: a Large-Scale Meta-Analysis of 3,211,768 Patients and 113,383,368 Controls.” *World Psychiatry* 16, no. 2 (December 2017): 163–80. <https://doi.org/10.1002/wps.20420>.
- Cucherat M, Bonnefoy E, Tremeau G. “Primary angioplasty versus intravenous thrombolysis for acute myocardial infarction.” *Cochrane Database Syst Rev* 2000; CD001560.

- Curry, Susan J., Alex H. Krist, Douglas K. Owens, Michael J. Barry, Aaron B. Caughey, Karina W. Davidson, Chyke A. Doubeni, et al. "Screening for Cervical Cancer." *Jama* 320, no. 7 (2018): 674. <https://doi.org/10.1001/jama.2018.10897>.
- Cutler, David M, Ghosh K, Messer K, Raghunathan TE, Stewart ST, Rosen AB, "Explaining the slowdown in medical spending growth among the elderly, 1999–2012." *Health Aff*(Millwood), 38(2), February 2019, 222-229.
- da Silva, Joaquim, Manuel Gonçalves-Pereira, Miguel Xavier, and Elizabeta B. Mukaetova-Ladinska. "Affective Disorders and Risk of Developing Dementia: Systematic Review." *British Journal of Psychiatry* 202, no. 3 (2013): 177–86. <https://doi.org/10.1192/bjp.bp.111.101931>.
- De Hert, Marc, Johan Detraux, and Davy Vancampfort. "The Intriguing Relationship between Coronary Heart Disease and Mental Disorders." *Dialogues in Clinical Neuroscience* 20, no. 1 (2018): 31–40. <https://doi.org/10.31887/dcns.2018.20.4/fthibaut>.
- Dunlop, Dorothy D., Pamela Semanik, Jing Song, Larry M. Manheim, Vivian Shih, and Rowland W. Chang. "Risk Factors for Functional Decline in Older Adults with Arthritis." *Arthritis & Rheumatism* 52, no. 4 (2005): 1274–82. <https://doi.org/10.1002/art.20968>.
- Elixhauser A, Steiner C, Palmer L. "Clinical Classifications Software (CCS)," U.S. Agency for Healthcare Research and Quality, Available: <http://www.hcup-us.ahrq.gov/toolssoftware/ccs/ccs.jsp>.
- Emdin, Connor A., Ayodele Odutayo, Christopher X. Wong, Jenny Tran, Allan J. Hsiao, and Benjamin H.m. Hunn. "Meta-Analysis of Anxiety as a Risk Factor for Cardiovascular Disease." *The American Journal of Cardiology* 118, no. 4 (2016): 511–19. <https://doi.org/10.1016/j.amjcard.2016.05.041>.
- Eraso, Luis H, Eri Fukaya, Emile R Mohler, Dawei Xie, Daohang Sha, and Jeffrey S Berger. "Peripheral Arterial Disease, Prevalence and Cumulative Risk Factor Profile Analysis." *European Journal of Preventive Cardiology* 21, no. 6 (2012): 704–11. <https://doi.org/10.1177/2047487312452968>.
- Ettehad, Dena, Connor A Emdin, Amit Kiran, Simon G Anderson, Thomas Callender, Jonathan Emberson, John Chalmers, Anthony Rodgers, and Kazem Rahimi. "Blood Pressure Lowering for Prevention of Cardiovascular Disease and Death: a Systematic Review and Meta-Analysis." *The Lancet* 387, no. 10022 (2016): 957–67. [https://doi.org/10.1016/s0140-6736\(15\)01225-8](https://doi.org/10.1016/s0140-6736(15)01225-8).
- Ezekowitz JA, Straus SE, Majumdar SR, McAlister FA. "Stroke: strategies for primary prevention." *American Family Physician*. 2003 December 15; 68(12):2379-86.
- Fenton, Joshua J., Meghan S. Weyrich, Shauna Durbin, Yu Liu, Heejung Bang, and Joy Melnikow. "Prostate-Specific Antigen–Based Screening for Prostate Cancer." *Jama* 319, no. 18 (August 2018): 1914. <https://doi.org/10.1001/jama.2018.3712>.

- Ferketich, Amy K., Judith A. Schwartzbaum, David J. Frid, and Melvin L. Moeschberger. "Depression as an Antecedent to Heart Disease Among Women and Men in the NHANES I Study." *Archives of Internal Medicine* 160, no. 9 (August 2000): 1261. <https://doi.org/10.1001/archinte.160.9.1261>.
- Fonarow C, "Prevention of Heart Failure: Effective Strategies to Combat the Growing Epidemic." *Rev Cardiovasc Med*. 2003;4(1):8–17.
- Ford ES, Ajani UA, Croft JB, Critchley JA, Labarthe DR, et al. "Explaining the decrease in U.S. deaths from coronary disease, 1980–2000." *N. Engl. J. Med.*, 2007, 356:2388-98.
- Fox KA, Poole-Wilson P, Clayton TC et al. "5-year outcome of an interventional strategy in non-ST-elevation acute coronary syndrome: the British Heart Foundation RITA 3 randomised trial." *Lancet* 2005;366:914-20.
- Fox, Caroline S, Kunihiro Matsushita, Mark Woodward, Henk Jg Bilo, John Chalmers, Hiddo J Lambers Heerspink, Brian J Lee, et al. "Associations of Kidney Disease Measures with Mortality and End-Stage Renal Disease in Individuals with and without Diabetes: a Meta-Analysis." *The Lancet* 380, no. 9854 (2012): 1662–73. [https://doi.org/10.1016/s0140-6736\(12\)61350-6](https://doi.org/10.1016/s0140-6736(12)61350-6).
- Gan, Yong, Yanhong Gong, Xinyue Tong, Huilian Sun, Yingjie Cong, Xiaoxin Dong, Yunxia Wang, et al. "Depression and the Risk of Coronary Heart Disease: a Meta-Analysis of Prospective Cohort Studies." *BMC Psychiatry* 14, no. 1 (2014). <https://doi.org/10.1186/s12888-014-0371-z>.
- Garfield, Lauren D., Jeffrey F. Scherrer, Paul J. Hauptman, Kenneth E. Freedland, Tim Chrusciel, Sumitra Balasubramanian, Robert M. Carney, et al. "Association of Anxiety Disorders and Depression With Incident Heart Failure." *Psychosomatic Medicine* 76, no. 2 (2014): 128–36. <https://doi.org/10.1097/psy.0000000000000027>.
- Gopal, Deepa M., Andreas P. Kalogeropoulos, Vasiliki V. Georgiopoulou, Andrew L. Smith, Douglas C. Bauer, Anne B. Newman, Lauren Kim, et al. "Cigarette Smoking Exposure and Heart Failure Risk in Older Adults: The Health, Aging, and Body Composition Study." *American Heart Journal* 164, no. 2 (2012): 236–42. <https://doi.org/10.1016/j.ahj.2012.05.013>.
- Greendale, Gail A, Elizabeth Barrett-Connor, Sue Ingles, and Robert Haile. "Late Physical and Functional Effects of Osteoporotic Fracture in Women: The Rancho Bernardo Study." *Journal of the American Geriatrics Society* 43, no. 9 (1995): 955–61. <https://doi.org/10.1111/j.1532-5415.1995.tb05557.x>.
- Grenon, S. Marlene, Jade Hiramoto, Kim G. Smolderen, Eric Vittinghoff, Mary A. Whooley, and Beth E. Cohen. "Association Between Depression and Peripheral Artery Disease: Insights From the Heart and Soul Study." *Journal of the American Heart Association* 1, no. 4 (June 2012). <https://doi.org/10.1161/jaha.112.002667>.

- Griffin SJ, Leaver JK, Irving GJ. “Impact of metformin on cardiovascular disease: a meta-analysis of randomised trials among people with type 2 diabetes.” *Diabetologia* September 2017;Volume 60, Issue 9, pp 1620–1629.
- Hennekens C. “Update on Aspirin in the Treatment and Prevention of Cardiovascular Disease.” *The American Journal of Managed Care*, Vol. 8, No. 22, SUP., 2002.
- Hosmer DW, Lemeshow S, “Goodness of fit tests for the multiple logistic regression model,” *Communications in Statistics - Theory and Methods*, 1980, 9:10, 1043-1069.
- Health and Retirement Study (HRS) public use datasets, 1998-2012. Produced and distributed by the University of Michigan with funding from the National Institute on Aging (grant number NIA U01AG009740). Ann Arbor, MI. <https://hrs.isr.umich.edu/> (accessed August 27, 2021).
- Htar, Myint Tin Tin, Anke L. Stuurman, Germano Ferreira, Cristiano Alicino, Kaatje Bollaerts, Chiara Paganino, Ralf René Reinert, et al. “Effectiveness of Pneumococcal Vaccines in Preventing Pneumonia in Adults, a Systematic Review and Meta-Analyses of Observational Studies.” *Plos One* 12, no. 5 (2017). <https://doi.org/10.1371/journal.pone.0177985>.
- Huxley, Rachel, Federica Barzi, and Mark Woodward. “Excess Risk of Fatal Coronary Heart Disease Associated with Diabetes in Men and Women: Meta-Analysis of 37 Prospective Cohort Studies.” *Bmj* 332, no. 7533 (2005): 73–78. <https://doi.org/10.1136/bmj.38678.389583.7c>.
- Jafar, Tazeen H., Paul C. Stark, Christopher H. Schmid, Marcia Landa, Giuseppe Maschio, Paul E. De Jong, Dick De Zeeuw, Shahnaz Shahinfar, Robert Toto, and Andrew S. Levey. “Progression of Chronic Kidney Disease: The Role of Blood Pressure Control, Proteinuria, and Angiotensin-Converting Enzyme Inhibition: A Patient-Level Meta-Analysis.” *Annals of Internal Medicine* 139, no. 4 (2003): 244. <https://doi.org/10.7326/0003-4819-139-4-200308190-00006>.
- James, M T, M E Grams, M R Woodward, C A Elley, J C Green, D T Wheeler, P S do Jong, et al. “Select A Meta-Analysis Of the Association Of Estimated Gfr, Albuminuria, Diabetes Mellitus, and Hypertension With Acute Kidney Injury.” *American Journal of Kidney Diseases* 66, no. 4 (October 2015): 602–12. <https://doi.org/10.1053/j.ajkd.2015.02.338>.
- Kaiser C, Brunner-La Rocca HP, Buser PT et al. “Incremental cost-effectiveness of drug-eluting stents compared with a third-generation bare-metal stent in a real-world setting: randomised Basel Stent Kosten Effektivitats Trial (BASKET).” *Lancet* 2005;366:921-9.
- Kenchaiah, Satish, Jane C Evans, Daniel Levy, Peter W F Wilson, Emelia J Benjamin, Martin G Larson, William B Kannel, and Ramachandran S Vasan. “Obesity and the Risk of Heart Failure.” *New England Journal of Medicine* 347, no. 23 (May 2002): 1887–89. <https://doi.org/10.1056/nejm200212053472314>.

- Kreuter F, Olson K, Wagner J, Yan T, Ezzati-Rice TB, Casas-Codero C, Lemay M, Pitches A, Groves RM, Raghunathan T, “Using Proxy Measures and Other Correlates of Survey Outcomes to Adjust for Nonresponse: Examples from Multiple Surveys,” *Journal of the Royal Statistical Society: Series A (Statistics in Society)*, 2010; 173(2):389-407.
- Langa KM, Larson EB, Crimmins EM, et al. “A Comparison of the Prevalence of Dementia in the United States in 2000 and 2012.” *JAMA Intern Med.* 2017; 177(1):51–58.
- Lastrucci, Vieri, Chiara Lorini, Giada Rinaldi, and Guglielmo Bonaccorsi. “Identification of Fall Predictors in the Active Elderly Population from the Routine Medical Records of General Practitioners.” *Primary Health Care Research & Development* 19, no. 02 (May 2017): 131–39. <https://doi.org/10.1017/s146342361700055x>.
- Lin, Jennifer S., Margaret A. Piper, Leslie A. Perdue, Carolyn M. Rutter, Elizabeth M. Webber, Elizabeth O’Connor, Ning Smith, and Evelyn P. Whitlock. “Screening for Colorectal Cancer.” *Jama* 315, no. 23 (2016): 2576. <https://doi.org/10.1001/jama.2016.3332>.
- Little RJ. “Survey non-response adjustments,” *International Statistical Review*, 1986; 54(2):139-157.
- Little, R, and T. Raghunathan, “Should Imputation of Missign Data Condition on All Observed Variables?” Proceedings of the Section on Survey Research Methods of the American Statistical Association, Alexandria, VA: American Statistical Association, 1997, 617–22.
- Lobstein, Tim and J. Leach. Data documentation for the Dynamic Modelling for Health Impact Assessment (DYNAMO-HIA) Project. Workpackage 7: Overweight and obesity report on data collection for overweight and obesity prevalence and related relative risks. International Association for the Study of Obesity, London; 2010. Available online [accessed on 15 June 2016]): [https://www.dynamo-hia.eu/sites/default/files/2018-04/BMI\\_WP7-](https://www.dynamo-hia.eu/sites/default/files/2018-04/BMI_WP7-)
- Meara, Ellen., White, C., & Cutler, D. M., “Trends In Medical Spending By Age, 1963-2000,” *Health Affairs*, 2004, 23(4), 176-183.
- Nadkarni VM, Larkin GL, Peberdy MA et al. “First documented rhythm and clinical outcome from in-hospital cardiac arrest among children and adults.” *JAMA* 2006;295:50-7.
- Nelson, Heidi D., Rochelle Fu, Amy Cantor, Miranda Pappas, Monica Daeges, and Linda Humphrey. “Effectiveness of Breast Cancer Screening: Systematic Review and Meta-Analysis to Update the 2009 U.S. Preventive Services Task Force Recommendation.” *Annals of Internal Medicine* 164, no. 4 (December 2016): 244. <https://doi.org/10.7326/m15-0969>.
- Nichol MB, Venturini F, Sung JC. “A critical evaluation of the methodology of the literature on medication compliance”. *Ann Pharmacother* 1999;33:531-40.

- Normand, Sharon-Lise T., Mary Beth Landrum, Edward Guadagnoli, John Z. Ayanian, Thomas J. Ryan, Paul D. Cleary, Barbara J. McNeil, “Validating recommendations for coronary angiography following an acute myocardial infarction in the elderly: A matched analysis using propensity scores.” *Journal of Clinical Epidemiology*. 2001, 54:387–398.
- O'Donnell, Martin J, Denis Xavier, Lisheng Liu, Hongye Zhang, Siu Lim Chin, Purnima Rao-Melacini, Sumathy Rangarajan, et al. “Risk Factors for Ischaemic and Intracerebral Haemorrhagic Stroke in 22 Countries (the INTERSTROKE Study): a Case-Control Study.” *The Lancet* 376, no. 9735 (2010): 112–23. [https://doi.org/10.1016/s0140-6736\(10\)60834-3](https://doi.org/10.1016/s0140-6736(10)60834-3).
- Ogata S, Nishimura K, Guzman-Castillo M, Sumita Y, Nakai M, Nakao YM, et al. “Explaining the decline in coronary heart disease mortality rates in Japan: Contributions of changes in risk factors and evidence-based treatments between 1980 and 2012.” *International Journal of Cardiology*. 2019 Sep 15;291:183-188.
- Ogilvie, Rachel P., Susan A. Everson-Rose, W.t. Longstreth, Carlos J. Rodriguez, Ana V. Diez-Roux, and Pamela L. Lutsey. “Psychosocial Factors and Risk of Incident Heart Failure.” *Circulation: Heart Failure* 9, no. 1 (2016). <https://doi.org/10.1161/circheartfailure.115.002243>.
- Osterholm, Michael T, Nicholas S Kelley, Alfred Sommer, and Edward A Belongia. “Efficacy and Effectiveness of Influenza Vaccines: a Systematic Review and Meta-Analysis.” *The Lancet Infectious Diseases* 12, no. 1 (2012): 36–44. [https://doi.org/10.1016/s1473-3099\(11\)70295-x](https://doi.org/10.1016/s1473-3099(11)70295-x).
- Owsley, Cynthia, Gerald McGwin Jr, and Karlene Ball. “Vision Impairment, Eye Disease, and Injurious Motor Vehicle Crashes in the Elderly.” *Ophthalmic Epidemiology* 5, no. 2 (1998): 101–13. <https://doi.org/10.1076/oep.5.2.101.1574>.
- Owsley, Cynthia. “Impact of Cataract Surgery on Motor Vehicle Crash Involvement by Older Adults.” *Jama* 288, no. 7 (2002): 841. <https://doi.org/10.1001/jama.288.7.841>.
- O'Regan, Christopher, Ping Wu, Paul Arora, Dan Perri, and Edward J. Mills. “Statin Therapy in Stroke Prevention: A Meta-Analysis Involving 121,000 Patients.” *The American Journal of Medicine* 121, no. 1 (2008): 24–33. <https://doi.org/10.1016/j.amjmed.2007.06.033>.
- Pesch B, Kendzia B, Gustavsson P, Jöckel KH, Johnen G, Pohlabein H, Olsson A, Ahrens W, Gross IM, Bröske I, Wichmann HE, Merletti F, Richiardi L, Simonato L, Fortes C, Siemiatycki J, Parent ME, Consonni D, Landi MT, Caporaso N, Zaridze D, Cassidy A, Szeszenia-Dabrowska N, Rudnai P, Lissowska J, Stücker I, Fabianova E, Dumitru RS, Bencko V, Foretova L, Janout V, Rudin CM, Brennan P, Boffetta P, Straif K, Brüning T. Cigarette smoking and lung cancer—relative risk estimates for the major histological types from a pooled analysis of case-control studies. *Int J Cancer*. 2012 Sep 1;131(5):1210-9. doi: 10.1002/ijc.27339. Epub 2011 Dec 14.

- Profenno, Louis A., Anton P. Porsteinsson, and Stephen V. Faraone. "Meta-Analysis of Alzheimers Disease Risk with Obesity, Diabetes, and Related Disorders." *Biological Psychiatry* 67, no. 6 (2010): 505–12. <https://doi.org/10.1016/j.biopsych.2009.02.013>.
- Psaty Bruce M, et al. Blockers and Primary Prevention of Coronary Heart Disease in Patients With High Blood Pressure. *JAMA*. 1989 Apr 14;261(14):2087-94.
- Raghunathan, Trivellore E, and Paulin, GS, "Multiple imputation of income in the Consumer Expenditure Survey: Evaluation of statistical inference. *Proceedings of the Section on Business and Economic Statistics, American Statistical Association*, 1998, 110.
- Raghunathan, Trivellore E, Lepkowski JM, Hoewyk JV, Solenberger P, "A Multivariate Technique for Multiply Imputing Missing Values Using a Sequence of Regression Models," *Survey Methodology*, 2001; 27(1):85-95.
- Raghunathan, Trivellore E, Kaushik Ghosh, Allison Rosen, Paul Imbriano, Susan Stewart, Irina Bondarenko, Cassandra Messer, Patricia Berglund, James Shaffer, and David Cutler, "Combining Information from Multiple Data Sources to Assess Population Health," *Journal of Survey Statistics and Methodology*, March 2020, smz047, <https://doi.org/10.1093/jssam/smz047>
- RAND HRS Longitudinal File 2018 (Feb 2021 (V1) and RAND HRS Fat Files, 1998-2012. Produced by the RAND Center for the Study of Aging, with funding from the National Institute on Aging and the Social Security Administration. Santa Monica, CA. <https://www.rand.org/well-being/social-and-behavioral-policy/centers/aging/dataproduct.html> <https://hrsdata.isr.umich.edu/data-products/rand> (accessed August 27, 2021).
- Rice, Dorothy P., "Estimating the Cost of Illness," *American Journal of Public Health*, 1967, 57(3): 424–440.
- Rondy, Marc, Nathalie El Omeiri, Mark G. Thompson, Alain Levêque, Alain Moren, and Sheena G. Sullivan. "Effectiveness of Influenza Vaccines in Preventing Severe Influenza Illness among Adults: A Systematic Review and Meta-Analysis of Test-Negative Design Case-Control Studies." *Journal of Infection* 75, no. 5 (2017): 381–94. <https://doi.org/10.1016/j.jinf.2017.09.010>.
- Romero, SP, Andrey JL, Garcia-Egido A, Escobar MA, Perez V, Corzo R, Garcia-Domiguez GJ, Gomez F. "Metformin therapy and prognosis of patients with heart failure and new-onset diabetes mellitus. A propensity-matched study in the community." *International Journal of Cardiology*. 20 June 2013; Volume 166, Issue 2, Pages 404-412.
- Rosen, Allison B, Kaushik Ghosh, Emily S. Pape, Marcelo Coca Perrailon, Irina Bondarenko, Cassandra L. Messer, Trivellore Raghunathan, Susan T. Stewart, and David M. Cutler, "Strengthening National Data to Better Measure What We Are Buying in Health Care: Reconciling National Health Expenditures with Detailed Survey Data", NBER Working Paper No. 23290, March 2017.

- Rosenbaum, P. R. and Rubin, D. B. “The Central Role of the Propensity Score in Observational Studies for Causal Effects,” *Biometrika*, 1983, 70:41–55.
- Rosenbaum P. R., and Rubin, D. B. “Reducing bias in observational studies using subclassification on the propensity score,” *Journal of the American Statistical Association*, 1984, 79(387): 516-524.
- Rothwell, PM et al., “Analysis of pooled data from the randomised controlled trials of endarterectomy for symptomatic carotid stenosis.” *Lancet*. 2003; 361: 107–116
- Roy, Samit S., Randi E. Foraker, Richard A. Gorton, and Alyssa J. Mansfield. “Posttraumatic Stress Disorder and Incident Heart Failure Among a Community-Based Sample of US Veterans.” *American Journal of Public Health* 105, no. 4 (2015): 757–63.  
<https://doi.org/10.2105/ajph.2014.302342>.
- Sakatani, Tomohiko, Takeshi Shirayama, Yoko Suzaki, Taku Yamamoto, Hiroki Mani, Tatsuya Kawasaki, Hiroki Sugihara, and Hiroaki Matsubara. “The Association Between Cholesterol and Mortality in Heart Failure.” *International Heart Journal* 46, no. 4 (2005): 619–29.  
<https://doi.org/10.1536/ihj.46.619>.
- Sanikini, Harinakshi, Jian-Min Yuan, Lesley M. Butler, Woon-Puay Koh, Yu-Tang Gao, Annika Steffen, Mattias Johansson, et al. “Body Mass Index and Lung Cancer Risk: a Pooled Analysis Based on Nested Case-Control Studies from Four Cohort Studies.” *BMC Cancer* 18, no. 1 (2018).  
<https://doi.org/10.1186/s12885-018-4124-0>.
- Sciarretta, Sebastiano, Francesca Palano, Giuliano Tocci, Rossella Baldini, and Massimo Volpe. “Antihypertensive Treatment and Development of Heart Failure in Hypertension.” *Archives of Internal Medicine* 171, no. 5 (2011).  
<https://doi.org/10.1001/archinternmed.2010.427>.
- Shah, Anoop Dinesh, Claudia Langenberg, Eleni Rapsomaniki, Spiros Denaxas, Mar Pujades-Rodriguez, Chris P Gale, John Deanfield, Liam Smeeth, Adam Timmis, and Harry Hemingway. “Type 2 Diabetes and Incidence of a Wide Range of Cardiovascular Diseases: a Cohort Study in 1·9 Million People.” *The Lancet* 385 (2015).  
[https://doi.org/10.1016/s0140-6736\(15\)60401-9](https://doi.org/10.1016/s0140-6736(15)60401-9).
- Shen, Yanjue, Rongrong Cai, Jie Sun, Xue Dong, Rong Huang, Sai Tian, and Shaohua Wang. “Diabetes Mellitus as a Risk Factor for Incident Chronic Kidney Disease and End-Stage Renal Disease in Women Compared with Men: a Systematic Review and Meta-Analysis.” *Endocrine* 55, no. 1 (January 2016): 66–76. <https://doi.org/10.1007/s12020-016-1014-6>.

- Sherwood, Andrew, J A Blumenthal, and R Trivedi. "Relationship of Depression to Death or Hospitalization in Patients With Heart Failure." *Archives of Internal Medicine* 167, no. 4 (2007): 367. <https://doi.org/10.1001/archinte.167.4.367>.
- Sing, Merrile et al., "Reconciling Medical Expenditure Estimates from the MEPS and NHEA, 2002." *Health Care Financing Review* 28, no. 1 (2006): 25–40.
- Stewart Susan T, RM Woodward, AB Rosen, and DM Cutler. The impact of symptoms and impairments on overall health in US national health data. *Med Care*. 2008;46(9):954-62.
- Taylor Rod S, Brown A, Ebrahim S et al. "Exercise-based rehabilitation for patients with coronary heart disease: systematic review and meta-analysis of randomized controlled trials." *Am J Med* 2004;116:682-92.
- Trogdon, Justin, Eric A. Finkelstein, and Thomas J. Hoerger, "Use of Econometric Models to Estimate Expenditure Shares." *Health Services Research*, August 2008, 43(4): 1442–1452.
- Turnbull F. Blood Pressure Lowering Treatment Trialists' Collaboration "Blood pressure-dependent and independent effects of agents that inhibit the renin–angiotensin system." *Journal of Hypertension* 2007, 25:951–958.
- Velagaleti, Raghava S., Joseph Massaro, Ramachandran S. Vasan, Sander J. Robins, William B. Kannel, and Daniel Levy. "Relations of Lipid Concentrations to Heart Failure Incidence." *Circulation* 120, no. 23 (August 2009): 2345–51. <https://doi.org/10.1161/circulationaha.109.830984>.
- Vreecer M, Turk S, Drinovec J, Mrhar A. "Use of statins in primary and secondary prevention of coronary heart disease and ischemic stroke. Meta-analysis of randomized trials." *Int J Clin Pharmacol Ther*. 2003 Dec; 41(12):567-77.
- Wang, Jiayang, Wenyuan Yu, Ye Zhou, Yong Yang, Chenglong Li, Nan Liu, Xiaotong Hou, and Longfei Wang. "Independent Risk Factors Contributing to Acute Kidney Injury According to Updated Valve Academic Research Consortium-2 Criteria After Transcatheter Aortic Valve Implantation: A Meta-Analysis and Meta-Regression of 13 Studies." *Journal of Cardiothoracic and Vascular Anesthesia* 31, no. 3 (2017): 816–26. <https://doi.org/10.1053/j.jvca.2016.12.021>.
- Wang, Juan, Dan Chen, Da-Bing Li, Xin Yu, and Guo-Bing Shi. "Comparison of the Efficacy and Safety of Intensive-Dose and Standard-Dose Statin Treatment for Stroke Prevention." *Medicine* 95, no. 39 (2016). <https://doi.org/10.1097/md.00000000000004950>.
- Wei, Eric X., and Yuri Agrawal. "Association Between Vestibular Vertigo and Motor Vehicle Accidents." *Ear and Hearing* 39, no. 6 (2018): 1232–35. <https://doi.org/10.1097/aud.0000000000000602>.

- Williams, Setareh A., Stanislav V. Kasl, Asefeh Heiat, Jerome L. Abramson, Harlan M. Krumholz, and Viola Vaccarino. "Depression and Risk of Heart Failure Among the Elderly: A Prospective Community-Based Study." *Psychosomatic Medicine* 64, no. 1 (2002): 6–12. <https://doi.org/10.1097/00006842-200201000-00002>.
- Young, J. Hunter, M J Klag, P L Munter, J undefined Whyte, M undefined Pahor, and J undefined Coresh. "Blood Pressure and Decline in Kidney Function: Findings from the Systolic Hypertension in the Elderly Program (SHEP)." *Journal of the American Society of Nephrology* 13, no. 11 (January 2002): 2776–82. <https://doi.org/10.1097/01.asn.00000031805.09178.37>.
- Yusuf S, Zucker D, Peduzzi P et al. "Effect of coronary artery bypass graft surgery on survival: overview of 10-year results from randomised trials by the Coronary Artery Bypass Graft Surgery Trialists Collaboration." *Lancet* 1994; 344:563-70
- Yusuf S, Sleight P, Pogue J, Bosch J, Davies R, Dagenais G. Heart Outcomes Prevention Evaluation Study Investigators. "Effects of an angiotensin-converting-enzyme inhibitor, ramipril, on cardiovascular events in high-risk patients." *The New England Journal of Medicine*. 2000. 342(3):145-153.
